# Supplementary material for: Structural and functional characterization of G protein–coupled receptors with deep mutational scanning
Source: eLife. 2020 Oct 21;9:e54895. doi: 10.7554/eLife.54895 (PMC7707821; doi:10.7554/eLife.54895)
Supplement: Supplementary file 1. — A table describing the list of 55 species used for the analysis of evolutionary constraint of residues from the OMA database. [file elife-54895-supp1.xls]

## Sheet: Supplementary Table 1
OMA_ID	Cross_Ref	Relation	Taxon
HUMAN24043	ADRB2_HUMAN	self	Homo sapiens
LEPOC14861	W5MSP8	1:1 ortholog	Lepisosteus oculatus
GASAC21100	G3Q3E6	1:1 ortholog	Gasterosteus aculeatus
TETNG00185	H3DI49	1:1 ortholog	Tetraodon nigroviridis
ORENI11267	I3KXN6	1:1 ortholog	Oreochromis niloticus
GADMO11017	ENSGMOG00000001811	1:1 ortholog	Gadus morhua
PROCA07275	ENSPCAG00000013986	1:1 ortholog	Procavia capensis
LOXAF20150	G3U0G1	1:1 ortholog	Loxodonta africana
ECHTE05861	ENSETEG00000014449	1:1 ortholog	Echinops telfairi
RABIT09463	G1TAV7	1:1 ortholog	Oryctolagus cuniculus
CAVPO16083	ADRB2_CAVPO	1:1 ortholog	Cavia porcellus
CHILA04763	ENSCLAG00000017769.1	1:1 ortholog	Chinchilla lanigera
MOUSE19617	ADRB2_MOUSE	1:1 ortholog	Mus musculus
RATNO09651	Q8VBU7	1:1 ortholog	Rattus norvegicus
ICTTR07475	I3MUE3	1:1 ortholog	Ictidomys tridecemlineatus
CHLSB11093	A0A0D9SEC3	1:1 ortholog	Chlorocebus sabaeus
MACMU19127	ADRB2_MACMU	1:1 ortholog	Macaca mulatta
PAPAN15167	ENSPANG00000025700	1:1 ortholog	Papio anubis
GORGO16803	G3QRR6	1:1 ortholog	Gorilla gorilla gorilla
PANPA32880	ENSPPAG00000036592.1	1:1 ortholog	Pan paniscus
PANTR36517	H2QRR3	1:1 ortholog	Pan troglodytes
PONAB12729	H2PH05	1:1 ortholog	Pongo abelii
CALJA10440	F7IE74	1:1 ortholog	Callithrix jacchus
TARSY03310	ENSTSYG00000011842	1:1 ortholog	Tarsius syrichta
MICMU14831	ENSMICG00000002569	1:1 ortholog	Microcebus murinus
OTOGA18390	Q71BQ2	1:1 ortholog	Otolemur garnettii
TUPBE05641	ENSTBEG00000004064	1:1 ortholog	Tupaia belangeri
CANLF14941	G1K2D2	1:1 ortholog	Canis lupus familiaris
MUSPF19799	M3YS74	1:1 ortholog	Mustela putorius furo
AILME13894	D2H8N7	1:1 ortholog	Ailuropoda melanoleuca
FELCA01090	ADRB2_FELCA	1:1 ortholog	Felis catus
TURTR16281	ENSTTRG00000008381	1:1 ortholog	Tursiops truncatus
BOVIN18143	ADRB2_BOVIN	1:1 ortholog	Bos taurus
SHEEP16911	W5PY67	1:1 ortholog	Ovis aries
PIGXX19998	ENSSSCG00000021165.1	1:1 ortholog	Sus scrofa
VICPA03220	ENSVPAG00000000389	1:1 ortholog	Vicugna pacos
PTEVA03318	ENSPVAG00000017405	1:1 ortholog	Pteropus vampyrus
MYOLU10668	G1P6Q9	1:1 ortholog	Myotis lucifugus
SORAR08388	ENSSARG00000005581	1:1 ortholog	Sorex araneus
HORSE05320	F6SWV0	1:1 ortholog	Equus caballus
DASNO11156	ENSDNOG00000040642	1:1 ortholog	Dasypus novemcinctus
SARHA10210	G3WFD5	1:1 ortholog	Sarcophilus harrisii
MACEU07753	ENSMEUG00000007636	1:1 ortholog	Macropus eugenii
ANAPL05774	R0M2P4	1:1 ortholog	Anas platyrhynchos
FICAL06023	U3KJ44	1:1 ortholog	Ficedula albicollis
PELSI15532	K7FNJ9	1:1 ortholog	Pelodiscus sinensis
ANOCA03190	ENSACAG00000015418	1:1 ortholog	Anolis carolinensis
IXOSC13027	B7PX95	1:1 ortholog	Ixodes scapularis
HYDVU14616	XP_012561946	1:1 ortholog	Hydra vulgaris
ASTMX14953	W5LUC3	1:n ortholog	Astyanax mexicanus
ASTMX15212	W5LTS1	1:n ortholog	Astyanax mexicanus
DANRE07052	E7EYN4	1:n ortholog	Danio rerio
DANRE20213	F1QBF9	1:n ortholog	Danio rerio
NEMVE03072	A7S8K5	1:n ortholog	Nematostella vectensis
NEMVE00175	A7RG65	1:n ortholog	Nematostella vectensis
CIOIN05049	F7BLL2	m:1 ortholog	Ciona intestinalis
HUMAN03664	P08588	close paralog	Homo sapiens
