# Supplementary material for: Structural and functional characterization of G protein–coupled receptors with deep mutational scanning
Source: eLife. 2020 Oct 21;9:e54895. doi: 10.7554/eLife.54895 (PMC7707821; doi:10.7554/eLife.54895)
Supplement: Supplementary file 2. — A table with the processed data used in this study. Includes the position, mutation, min activity, max activity, average activity, propagated uncertainty, coefficient of variation, number of barcodes for that mutation, mutation class, and an annotation of where in the β2AR the position is. [file elife-54895-supp2.xls]

## Sheet: SupplementaryTable2
Condition	Pos	AA	Min	Max	Norm	N	Uncert	PCV	Class	Struct
0	2	A	2.54992	3.33924	2.94458	1	NA	NA	Small	N-term
0	2	C	1.09746	1.93245	1.51495	7	0.960299	0.63388	Nucleophilic	N-term
0	2	D	2.07879	2.47656	2.27767	5	1.05519	0.463274	(-)	N-term
0	2	E	3.28192	3.53176	3.40684	4	1.89233	0.55545	(-)	N-term
0	2	F	0.311217	0.940785	0.626001	3	0.836628	1.33646	Aromatic	N-term
0	2	H	1.37888	2.67875	2.02882	6	1.98986	0.9808	(+)	N-term
0	2	I	2.31681	2.55787	2.43734	6	0.70965	0.291158	Hydrophobic	N-term
0	2	K	1.52266	1.62195	1.57231	10	0.497453	0.316384	(+)	N-term
0	2	L	2.27489	2.39822	2.33655	4	0.702286	0.300565	Hydrophobic	N-term
0	2	M	0.779736	2.22493	1.50233	5	1.44539	0.962096	Hydrophobic	N-term
0	2	N	2.54877	3.14734	2.84805	3	1.59931	0.561545	Amide	N-term
0	2	P	1.60278	2.14218	1.87248	6	1.17925	0.629779	Proline	N-term
0	2	Q	1.01636	1.59133	1.30384	7	0.88071	0.675472	Amide	N-term
0	2	R	0.533305	0.887145	0.710225	5	0.487544	0.686464	(+)	N-term
0	2	S	2.20761	2.66659	2.4371	10	1.59934	0.656246	Nucleophilic	N-term
0	2	T	2.22833	3.03838	2.63335	4	1.85082	0.702836	Nucleophilic	N-term
0	2	V	1.61322	2.024	1.81861	2	0.328117	0.180422	Hydrophobic	N-term
0	2	W	3.63675	4.55196	4.09436	2	0.742611	0.181374	Aromatic	N-term
0	2	Y	2.51969	5.15113	3.83541	2	2.70981	0.706524	Aromatic	N-term
0	3	A	1.6843	3.24248	2.46339	9	2.14561	0.870998	Small	N-term
0	3	C	1.2217	1.57415	1.39792	6	1.18209	0.845604	Nucleophilic	N-term
0	3	D	1.95227	2.08409	2.01818	13	1.44524	0.716108	(-)	N-term
0	3	E	1.36299	1.76538	1.56419	9	0.536619	0.343066	(-)	N-term
0	3	F	3.74886	4.36015	4.0545	4	3.61098	0.89061	Aromatic	N-term
0	3	G	2.43993	3.05495	2.74744	6	0.868274	0.31603	Small	N-term
0	3	H	2.83295	3.34114	3.08704	9	1.74038	0.563769	(+)	N-term
0	3	I	1.67634	3.40626	2.5413	4	0.375845	0.147895	Hydrophobic	N-term
0	3	K	1.61731	1.99803	1.80767	11	0.949886	0.525476	(+)	N-term
0	3	L	2.19647	2.86817	2.53232	10	1.40855	0.556231	Hydrophobic	N-term
0	3	M	1.27819	1.30036	1.28927	1	NA	NA	Hydrophobic	N-term
0	3	N	1.43411	1.54346	1.48878	11	1.0779	0.724017	Amide	N-term
0	3	P	0.643568	0.669294	0.656431	4	0.382446	0.582615	Proline	N-term
0	3	R	1.14055	1.67162	1.40608	3	1.09718	0.780309	(+)	N-term
0	3	S	1.41208	1.44445	1.42826	6	0.713283	0.499406	Nucleophilic	N-term
0	3	T	1.97581	2.12279	2.0493	9	0.865416	0.422299	Nucleophilic	N-term
0	3	V	0.929266	1.19136	1.06031	5	0.298119	0.281161	Hydrophobic	N-term
0	3	W	3.87268	5.81724	4.84496	6	3.46413	0.714996	Aromatic	N-term
0	3	Y	3.1851	4.2018	3.69345	9	2.65538	0.718942	Aromatic	N-term
0	4	A	1.97227	2.31678	2.14453	8	0.558092	0.26024	Small	N-term
0	4	C	2.65452	2.82516	2.73984	9	1.71039	0.624268	Nucleophilic	N-term
0	4	D	0.8942	1.01917	0.956683	7	0.669805	0.700133	(-)	N-term
0	4	E	1.71833	2.62826	2.1733	9	2.28851	1.05301	(-)	N-term
0	4	F	2.03059	2.07672	2.05366	9	1.3105	0.638129	Aromatic	N-term
0	4	G	0.970196	0.987328	0.978762	4	0.695524	0.710616	Small	N-term
0	4	H	1.27377	2.31924	1.7965	5	1.05556	0.587564	(+)	N-term
0	4	I	0.973196	1.1207	1.04695	3	0.725278	0.692755	Hydrophobic	N-term
0	4	K	1.73397	1.8058	1.76989	9	0.776899	0.438954	(+)	N-term
0	4	L	3.13237	3.39265	3.26251	9	1.63984	0.50263	Hydrophobic	N-term
0	4	M	1.06405	1.81587	1.43996	4	1.14083	0.792267	Hydrophobic	N-term
0	4	N	1.31736	1.75187	1.53462	7	1.02228	0.666147	Amide	N-term
0	4	Q	1.71053	2.47392	2.09222	5	1.02651	0.490631	Amide	N-term
0	4	R	2.18212	3.07391	2.62802	7	1.80923	0.688439	(+)	N-term
0	4	S	1.96671	3.00293	2.48482	6	0.93451	0.376087	Nucleophilic	N-term
0	4	T	1.17284	2.43368	1.80326	8	1.33523	0.740452	Nucleophilic	N-term
0	4	V	2.58763	2.88321	2.73542	6	2.29902	0.84046	Hydrophobic	N-term
0	4	W	1.86651	1.99234	1.92942	5	1.35747	0.703562	Aromatic	N-term
0	4	Y	2.12854	2.27107	2.19981	7	1.50933	0.686118	Aromatic	N-term
0	5	A	0.95342	2.15198	1.5527	6	1.35864	0.875018	Small	N-term
0	5	C	2.26897	2.50752	2.38824	6	1.20774	0.505701	Nucleophilic	N-term
0	5	D	1.81023	2.25265	2.03144	9	1.25987	0.620186	(-)	N-term
0	5	E	1.00156	1.60262	1.30209	6	0.859527	0.660115	(-)	N-term
0	5	F	2.05787	2.07493	2.0664	9	1.12663	0.545213	Aromatic	N-term
0	5	H	2.25388	2.33531	2.2946	13	1.10659	0.482259	(+)	N-term
0	5	I	1.25077	3.11893	2.18485	6	1.61204	0.737827	Hydrophobic	N-term
0	5	K	1.95279	2.37108	2.16193	6	0.464031	0.214637	(+)	N-term
0	5	L	1.48478	1.56762	1.5262	2	1.50475	0.985948	Hydrophobic	N-term
0	5	M	1.13253	1.7851	1.45881	6	1.10395	0.756745	Hydrophobic	N-term
0	5	N	1.06808	1.79479	1.43143	6	0.748175	0.522676	Amide	N-term
0	5	P	1.90418	2.0094	1.95679	6	1.18531	0.605741	Proline	N-term
0	5	Q	1.29405	2.86264	2.07834	8	1.51505	0.728968	Amide	N-term
0	5	R	1.93829	2.89252	2.41541	4	0.419677	0.17375	(+)	N-term
0	5	S	1.43645	2.2254	1.83093	8	1.2217	0.667258	Nucleophilic	N-term
0	5	T	1.71887	1.82132	1.7701	13	0.889665	0.502608	Nucleophilic	N-term
0	5	V	1.70702	2.24218	1.9746	7	0.854722	0.432858	Hydrophobic	N-term
0	5	W	1.00388	1.78683	1.39535	6	1.17441	0.84166	Aromatic	N-term
0	5	Y	1.74385	2.35085	2.04735	12	1.10401	0.539241	Aromatic	N-term
0	6	A	1.90565	1.94556	1.92561	5	1.28277	0.666163	Small	N-term
0	6	C	2.03021	3.15312	2.59166	6	1.84527	0.712002	Nucleophilic	N-term
0	6	D	0.685801	0.905365	0.795583	4	0.653134	0.82095	(-)	N-term
0	6	E	1.18044	1.69057	1.4355	7	1.43017	0.996286	(-)	N-term
0	6	F	1.87486	2.75509	2.31498	5	1.32873	0.573973	Aromatic	N-term
0	6	G	1.20244	1.90552	1.55398	3	0.963508	0.620027	Small	N-term
0	6	H	1.33779	1.62934	1.48356	8	0.730035	0.492082	(+)	N-term
0	6	I	2.10048	3.18942	2.64495	4	0.814323	0.307878	Hydrophobic	N-term
0	6	K	2.74554	2.74598	2.74576	6	0.994273	0.362112	(+)	N-term
0	6	L	3.089	3.24426	3.16663	8	3.20361	1.01168	Hydrophobic	N-term
0	6	M	2.30764	2.67948	2.49356	6	1.86563	0.748179	Hydrophobic	N-term
0	6	P	0.279184	2.19924	1.23921	4	1.88189	1.51862	Proline	N-term
0	6	Q	1.48756	1.6953	1.59143	7	0.995345	0.625439	Amide	N-term
0	6	R	1.42898	2.09669	1.76283	7	0.760931	0.431652	(+)	N-term
0	6	S	1.70868	1.87731	1.793	6	0.727248	0.405605	Nucleophilic	N-term
0	6	T	1.09817	1.33498	1.21657	7	0.779464	0.640704	Nucleophilic	N-term
0	6	V	0.57662	0.588036	0.582328	6	0.578834	0.994	Hydrophobic	N-term
0	6	W	3.02642	3.51808	3.27225	7	2.00597	0.613024	Aromatic	N-term
0	6	Y	2.39273	3.26743	2.83008	4	1.24673	0.440528	Aromatic	N-term
0	7	A	1.74728	2.13261	1.93994	9	1.35171	0.696777	Small	N-term
0	7	D	1.68598	1.76617	1.72608	11	0.916508	0.530978	(-)	N-term
0	7	E	1.88584	2.0148	1.95032	5	0.897637	0.460251	(-)	N-term
0	7	F	0.579372	0.796066	0.687719	9	0.720259	1.04731	Aromatic	N-term
0	7	H	1.98732	3.61981	2.80356	4	1.9243	0.686376	(+)	N-term
0	7	I	2.56823	3.91377	3.241	3	1.02287	0.315603	Hydrophobic	N-term
0	7	K	1.44591	1.64959	1.54775	10	0.70652	0.456482	(+)	N-term
0	7	L	1.75751	2.53422	2.14587	7	1.66943	0.777976	Hydrophobic	N-term
0	7	M	1.35865	5.00953	3.18409	6	4.70157	1.47658	Hydrophobic	N-term
0	7	N	2.04791	2.63834	2.34313	10	1.01704	0.434051	Amide	N-term
0	7	P	2.16896	3.27628	2.72262	4	3.65259	1.34157	Proline	N-term
0	7	Q	1.21902	1.69939	1.45921	6	0.705378	0.483398	Amide	N-term
0	7	R	2.07434	2.08694	2.08064	15	0.889	0.427272	(+)	N-term
0	7	S	1.23719	2.00197	1.61958	4	0.857309	0.529341	Nucleophilic	N-term
0	7	T	1.72646	2.50543	2.11594	6	1.02919	0.486396	Nucleophilic	N-term
0	7	V	2.45941	3.40629	2.93285	5	1.35089	0.460605	Hydrophobic	N-term
0	7	W	2.23648	2.74948	2.49298	1	NA	NA	Aromatic	N-term
0	7	Y	1.64672	1.96737	1.80704	8	1.19693	0.662368	Aromatic	N-term
0	8	A	1.12447	1.52957	1.32702	6	0.66811	0.503466	Small	N-term
0	8	C	2.46118	2.51372	2.48745	13	0.863607	0.347186	Nucleophilic	N-term
0	8	D	0.928499	1.00861	0.968554	8	0.633105	0.65366	(-)	N-term
0	8	E	1.47853	1.58001	1.52927	10	0.831692	0.543849	(-)	N-term
0	8	F	2.26885	3.31627	2.79256	7	2.0056	0.718193	Aromatic	N-term
0	8	G	1.47345	1.63332	1.55339	8	0.462315	0.297617	Small	N-term
0	8	H	1.08028	1.36494	1.22261	6	0.759365	0.6211	(+)	N-term
0	8	I	2.60536	6.71053	4.65794	3	0.972827	0.208853	Hydrophobic	N-term
0	8	K	1.27775	2.03049	1.65412	12	1.01613	0.614305	(+)	N-term
0	8	L	1.74418	2.82817	2.28618	9	1.79586	0.78553	Hydrophobic	N-term
0	8	M	3.51535	3.80322	3.65929	7	3.82438	1.04512	Hydrophobic	N-term
0	8	N	1.88918	2.38765	2.13841	5	1.08305	0.506472	Amide	N-term
0	8	P	3.56611	4.56586	4.06598	7	3.24941	0.79917	Proline	N-term
0	8	Q	0.843274	1.29474	1.06901	8	1.03313	0.96644	Amide	N-term
0	8	R	2.0921	2.14416	2.11813	8	0.89589	0.422962	(+)	N-term
0	8	T	1.07519	1.55596	1.31557	13	1.18374	0.899788	Nucleophilic	N-term
0	8	V	1.01921	1.36591	1.19256	9	0.962716	0.807268	Hydrophobic	N-term
0	8	W	1.38083	1.92203	1.65143	4	1.61263	0.976503	Aromatic	N-term
0	8	Y	1.23477	1.36362	1.29919	6	1.81433	1.39651	Aromatic	N-term
0	9	C	1.76573	2.4743	2.12002	10	1.60142	0.75538	Nucleophilic	N-term
0	9	D	1.28919	2.5079	1.89855	6	1.15652	0.609161	(-)	N-term
0	9	E	2.00104	2.37959	2.19032	6	1.43251	0.65402	(-)	N-term
0	9	F	2.07347	4.04468	3.05907	16	2.41218	0.788535	Aromatic	N-term
0	9	G	1.2611	1.59956	1.43033	9	0.507207	0.354609	Small	N-term
0	9	H	1.77252	3.12619	2.44936	8	1.7198	0.702141	(+)	N-term
0	9	I	2.19375	2.30492	2.24934	3	0.286024	0.127159	Hydrophobic	N-term
0	9	K	1.85157	1.98169	1.91663	8	0.583443	0.304411	(+)	N-term
0	9	L	3.69299	4.12654	3.90977	6	1.32425	0.338704	Hydrophobic	N-term
0	9	M	1.9417	2.64456	2.29313	7	0.842106	0.36723	Hydrophobic	N-term
0	9	N	1.19376	1.68901	1.44138	8	0.995576	0.690709	Amide	N-term
0	9	P	1.33893	2.80527	2.0721	6	1.1194	0.540225	Proline	N-term
0	9	Q	2.44632	3.36929	2.90781	9	2.49089	0.856621	Amide	N-term
0	9	R	1.60783	1.91989	1.76386	10	1.37561	0.779885	(+)	N-term
0	9	S	1.84777	2.5999	2.22383	6	1.30847	0.588383	Nucleophilic	N-term
0	9	T	0.888328	1.96968	1.42901	4	1.19238	0.834412	Nucleophilic	N-term
0	9	V	1.98505	2.34256	2.16381	4	0.578299	0.26726	Hydrophobic	N-term
0	9	W	1.58434	1.77091	1.67763	4	0.911237	0.543171	Aromatic	N-term
0	9	Y	1.92614	2.71234	2.31924	5	1.57725	0.680071	Aromatic	N-term
0	10	A	1.67318	2.49874	2.08596	7	0.641125	0.307353	Small	N-term
0	10	C	1.11933	1.12858	1.12396	4	0.876865	0.780159	Nucleophilic	N-term
0	10	D	1.27381	1.47754	1.37568	11	0.689003	0.500847	(-)	N-term
0	10	E	1.6728	1.78008	1.72644	9	0.53467	0.309695	(-)	N-term
0	10	G	1.58602	2.16508	1.87555	5	0.914342	0.487507	Small	N-term
0	10	H	0.542842	0.86532	0.704081	2	0.712323	1.01171	(+)	N-term
0	10	I	2.34885	2.80857	2.57871	9	0.588699	0.228292	Hydrophobic	N-term
0	10	K	1.39308	1.51747	1.45527	4	0.371598	0.255346	(+)	N-term
0	10	L	1.46934	1.54915	1.50925	11	1.13879	0.754543	Hydrophobic	N-term
0	10	M	1.96569	2.60498	2.28534	5	1.17029	0.512086	Hydrophobic	N-term
0	10	N	1.59801	1.85327	1.72564	6	0.935077	0.541872	Amide	N-term
0	10	P	0.887366	0.987596	0.937481	7	0.487704	0.520228	Proline	N-term
0	10	Q	1.75755	1.84648	1.80202	10	0.972348	0.539589	Amide	N-term
0	10	R	1.4257	1.74875	1.58723	8	0.966068	0.608651	(+)	N-term
0	10	S	1.50126	2.92972	2.21549	6	0.884599	0.399279	Nucleophilic	N-term
0	10	T	0.867555	1.27144	1.0695	5	0.545265	0.509833	Nucleophilic	N-term
0	10	V	1.46566	1.66368	1.56467	11	0.990214	0.632858	Hydrophobic	N-term
0	10	W	1.82302	1.98718	1.9051	8	1.0048	0.527424	Aromatic	N-term
0	10	Y	1.40164	1.92447	1.66306	9	1.11339	0.669486	Aromatic	N-term
0	11	A	1.69882	1.86452	1.78167	8	0.617159	0.346394	Small	N-term
0	11	C	1.06478	1.08868	1.07673	12	0.547271	0.508272	Nucleophilic	N-term
0	11	D	0.735057	0.861034	0.798046	7	0.674496	0.845184	(-)	N-term
0	11	E	1.28966	1.6729	1.48128	6	0.878074	0.59278	(-)	N-term
0	11	F	1.89374	2.19191	2.04283	8	0.81739	0.400127	Aromatic	N-term
0	11	G	0.343001	0.735348	0.539174	4	0.733999	1.36134	Small	N-term
0	11	H	1.46048	3.45617	2.45832	6	1.20837	0.491544	(+)	N-term
0	11	I	1.60763	2.30563	1.95663	7	1.09585	0.560072	Hydrophobic	N-term
0	11	K	1.39459	2.07154	1.73307	10	0.776371	0.447975	(+)	N-term
0	11	M	1.34685	3.12084	2.23385	8	2.05831	0.92142	Hydrophobic	N-term
0	11	N	1.30494	1.39003	1.34749	8	0.955173	0.708856	Amide	N-term
0	11	P	1.31725	1.76531	1.54128	6	0.611738	0.396901	Proline	N-term
0	11	Q	1.67042	2.51941	2.09492	3	0.946041	0.451589	Amide	N-term
0	11	R	3.91085	5.09567	4.50326	3	2.84697	0.632203	(+)	N-term
0	11	S	1.23913	1.87263	1.55588	6	0.81994	0.526994	Nucleophilic	N-term
0	11	T	1.87897	2.07093	1.97495	11	1.22177	0.618634	Nucleophilic	N-term
0	11	V	2.32141	3.61437	2.96789	6	1.99764	0.673083	Hydrophobic	N-term
0	11	W	2.93976	3.40159	3.17067	3	1.31127	0.413563	Aromatic	N-term
0	11	Y	1.59015	1.6239	1.60703	5	0.924478	0.575272	Aromatic	N-term
0	12	A	1.40902	2.40444	1.90673	5	1.01132	0.530396	Small	N-term
0	12	C	1.2633	1.66539	1.46435	8	0.686124	0.468553	Nucleophilic	N-term
0	12	D	1.64959	1.88331	1.76645	8	0.659112	0.373128	(-)	N-term
0	12	E	1.30234	1.92114	1.61174	6	0.814856	0.505576	(-)	N-term
0	12	F	2.18031	2.25425	2.21728	5	1.25193	0.564623	Aromatic	N-term
0	12	G	1.10317	1.23667	1.16992	7	0.827771	0.707543	Small	N-term
0	12	H	1.63295	2.19957	1.91626	16	1.03089	0.537971	(+)	N-term
0	12	I	0.974979	1.6632	1.31909	8	0.793054	0.601213	Hydrophobic	N-term
0	12	K	1.00835	1.7216	1.36498	9	0.718656	0.526497	(+)	N-term
0	12	M	1.84004	2.33642	2.08823	8	1.11394	0.533436	Hydrophobic	N-term
0	12	N	1.20437	1.3511	1.27774	10	0.394405	0.308674	Amide	N-term
0	12	P	2.34964	3.9813	3.16547	9	2.39178	0.755584	Proline	N-term
0	12	Q	0.757408	0.851068	0.804238	11	0.622775	0.774366	Amide	N-term
0	12	R	1.18676	1.31034	1.24855	11	0.953426	0.763626	(+)	N-term
0	12	S	1.51698	2.04736	1.78217	6	1.46864	0.824074	Nucleophilic	N-term
0	12	T	1.20801	1.59913	1.40357	7	0.682879	0.48653	Nucleophilic	N-term
0	12	V	1.35061	1.55952	1.45506	9	0.77965	0.535819	Hydrophobic	N-term
0	12	W	1.78396	2.2646	2.02428	5	0.814518	0.402374	Aromatic	N-term
0	12	Y	2.10173	2.2719	2.18681	12	0.995703	0.455321	Aromatic	N-term
0	13	C	1.29906	1.8417	1.57038	13	1.28617	0.819015	Nucleophilic	N-term
0	13	D	1.57392	1.81307	1.69349	10	0.668248	0.394597	(-)	N-term
0	13	E	1.70778	1.94912	1.82845	6	1.02941	0.562999	(-)	N-term
0	13	F	1.83783	2.96114	2.39949	10	1.77965	0.741678	Aromatic	N-term
0	13	G	1.05364	1.472	1.26282	7	0.972534	0.770128	Small	N-term
0	13	H	1.96584	3.09427	2.53006	6	1.50595	0.595222	(+)	N-term
0	13	I	1.515	2.16082	1.83791	7	1.73053	0.941573	Hydrophobic	N-term
0	13	K	1.45029	1.61957	1.53493	7	1.14373	0.745134	(+)	N-term
0	13	L	2.45332	3.27845	2.86588	9	1.40307	0.489578	Hydrophobic	N-term
0	13	M	2.05521	2.22044	2.13782	11	1.50867	0.705705	Hydrophobic	N-term
0	13	N	1.58433	2.1718	1.87806	9	1.30133	0.69291	Amide	N-term
0	13	P	1.92473	2.10334	2.01404	14	1.03457	0.513682	Proline	N-term
0	13	Q	1.33626	2.23937	1.78781	3	1.58923	0.888923	Amide	N-term
0	13	R	1.73261	1.85374	1.79317	5	1.32797	0.740568	(+)	N-term
0	13	S	2.73103	5.69721	4.21412	6	3.9549	0.938486	Nucleophilic	N-term
0	13	T	1.2083	1.97316	1.59073	6	1.11249	0.69936	Nucleophilic	N-term
0	13	V	2.06479	2.29456	2.17968	6	0.645189	0.296002	Hydrophobic	N-term
0	13	W	1.63815	2.4294	2.03378	8	1.69582	0.833829	Aromatic	N-term
0	13	Y	1.04303	1.05959	1.05131	9	0.901527	0.857527	Aromatic	N-term
0	14	A	1.4634	2.04985	1.75662	5	0.863285	0.491445	Small	N-term
0	14	C	2.27155	2.6123	2.44193	3	0.719423	0.294613	Nucleophilic	N-term
0	14	D	1.86082	2.01347	1.93714	15	1.20292	0.620978	(-)	N-term
0	14	E	1.44454	1.57019	1.50737	8	0.894145	0.593183	(-)	N-term
0	14	F	1.75805	2.50029	2.12917	7	1.46286	0.687057	Aromatic	N-term
0	14	G	0.890917	1.48628	1.1886	4	0.764009	0.642782	Small	N-term
0	14	H	1.20564	1.59386	1.39975	6	0.966663	0.690598	(+)	N-term
0	14	I	0.593466	1.2777	0.935583	7	0.965563	1.03204	Hydrophobic	N-term
0	14	K	3.11957	3.2272	3.17338	6	1.26534	0.398736	(+)	N-term
0	14	L	1.89795	2.64931	2.27363	5	1.75162	0.770409	Hydrophobic	N-term
0	14	M	1.96888	2.11935	2.04412	2	0.950237	0.464865	Hydrophobic	N-term
0	14	N	2.30372	2.89392	2.59882	13	1.66963	0.642456	Amide	N-term
0	14	Q	1.21889	1.95443	1.58666	7	0.858197	0.540882	Amide	N-term
0	14	R	1.74828	1.75688	1.75258	9	1.17194	0.668693	(+)	N-term
0	14	S	2.49205	2.83887	2.66546	5	1.2676	0.475566	Nucleophilic	N-term
0	14	T	2.15075	2.45914	2.30495	11	1.38984	0.602982	Nucleophilic	N-term
0	14	V	1.28823	2.6973	1.99276	7	2.00206	1.00466	Hydrophobic	N-term
0	14	W	1.87203	2.46902	2.17053	6	1.47868	0.681256	Aromatic	N-term
0	14	Y	2.80709	3.49431	3.1507	4	2.13218	0.676734	Aromatic	N-term
0	15	A	2.13575	2.90671	2.52123	5	0.669961	0.265727	Small	N-term
0	15	C	1.93352	2.38607	2.1598	18	1.40884	0.6523	Nucleophilic	N-term
0	15	D	1.37699	1.47477	1.42588	11	0.649197	0.455296	(-)	N-term
0	15	E	1.41192	2.28198	1.84695	6	1.069	0.57879	(-)	N-term
0	15	F	2.52336	3.50144	3.0124	4	1.52235	0.505361	Aromatic	N-term
0	15	G	2.00646	2.89545	2.45095	10	1.4935	0.609355	Small	N-term
0	15	H	1.51749	2.37615	1.94682	12	1.38834	0.713132	(+)	N-term
0	15	I	1.12359	1.43167	1.27763	6	0.921893	0.721564	Hydrophobic	N-term
0	15	K	1.33564	1.81052	1.57308	13	1.21394	0.771696	(+)	N-term
0	15	L	3.48839	3.55673	3.52256	8	1.57385	0.446792	Hydrophobic	N-term
0	15	M	2.05882	2.09967	2.07924	3	0.840394	0.404182	Hydrophobic	N-term
0	15	P	1.68981	1.76218	1.726	10	0.828242	0.479862	Proline	N-term
0	15	Q	1.74713	2.19238	1.96976	3	0.854331	0.433724	Amide	N-term
0	15	R	2.17837	2.66472	2.42155	8	0.821256	0.339145	(+)	N-term
0	15	S	2.10866	2.36036	2.23451	7	0.916192	0.410019	Nucleophilic	N-term
0	15	T	1.47976	2.12404	1.8019	7	0.991429	0.550213	Nucleophilic	N-term
0	15	V	1.22466	1.38814	1.3064	11	0.80306	0.614714	Hydrophobic	N-term
0	15	W	3.02888	3.05573	3.0423	10	1.92046	0.631252	Aromatic	N-term
0	15	Y	1.7648	2.35188	2.05834	2	2.07289	1.00707	Aromatic	N-term
0	16	A	1.78914	3.00947	2.39931	13	1.38781	0.57842	Small	N-term
0	16	C	1.79128	1.96946	1.88037	6	1.22528	0.651619	Nucleophilic	N-term
0	16	D	1.85132	4.23145	3.04139	4	3.64401	1.19814	(-)	N-term
0	16	E	2.79021	4.20716	3.49868	5	2.69879	0.771374	(-)	N-term
0	16	F	2.24271	3.01744	2.63007	6	2.40233	0.913411	Aromatic	N-term
0	16	H	2.125	2.44034	2.28267	5	1.0729	0.470017	(+)	N-term
0	16	I	2.07716	2.64236	2.35976	7	1.04029	0.440847	Hydrophobic	N-term
0	16	K	1.2872	1.49898	1.39309	5	0.636521	0.456913	(+)	N-term
0	16	L	3.39484	3.45358	3.42421	5	0.671398	0.196074	Hydrophobic	N-term
0	16	M	1.7866	2.46188	2.12424	11	1.05149	0.494995	Hydrophobic	N-term
0	16	N	1.93426	2.3422	2.13823	4	0.997473	0.466495	Amide	N-term
0	16	P	1.30417	1.70581	1.50499	6	0.988063	0.656526	Proline	N-term
0	16	Q	0.725575	1.44571	1.08564	4	1.25133	1.15262	Amide	N-term
0	16	R	1.16233	1.56185	1.36209	8	0.654966	0.480854	(+)	N-term
0	16	S	0.968034	1.80785	1.38794	4	0.858095	0.61825	Nucleophilic	N-term
0	16	T	0.917665	1.15241	1.03504	4	0.987552	0.954123	Nucleophilic	N-term
0	16	V	1.32927	1.73276	1.53101	3	0.990286	0.646817	Hydrophobic	N-term
0	16	W	1.04589	1.09512	1.07051	4	0.630546	0.589016	Aromatic	N-term
0	16	Y	0.163064	0.585447	0.374256	2	0.408001	1.09017	Aromatic	N-term
0	17	A	0.930151	1.47104	1.20059	3	0.742452	0.618404	Small	N-term
0	17	C	1.37179	1.5618	1.46679	15	0.955837	0.651652	Nucleophilic	N-term
0	17	D	2.08178	2.23765	2.15971	9	1.01782	0.471277	(-)	N-term
0	17	E	1.15094	1.88791	1.51942	7	0.866811	0.570487	(-)	N-term
0	17	F	2.15567	4.42276	3.28921	8	3.69162	1.12234	Aromatic	N-term
0	17	G	1.89568	2.09984	1.99776	3	0.785621	0.393251	Small	N-term
0	17	H	1.74869	3.52709	2.63789	9	1.99728	0.757151	(+)	N-term
0	17	I	3.07761	3.36251	3.22006	11	2.01448	0.625605	Hydrophobic	N-term
0	17	K	1.51746	3.21681	2.36713	7	1.26774	0.53556	(+)	N-term
0	17	L	1.8821	2.22732	2.05471	5	0.949681	0.462198	Hydrophobic	N-term
0	17	M	0.434964	0.569572	0.502268	2	0.440118	0.876261	Hydrophobic	N-term
0	17	N	2.09496	2.78559	2.44028	13	1.73416	0.710641	Amide	N-term
0	17	P	1.97058	2.96886	2.46972	12	1.38567	0.561065	Proline	N-term
0	17	Q	1.81992	2.29551	2.05771	6	0.949974	0.461665	Amide	N-term
0	17	R	1.28814	1.99445	1.6413	9	0.817143	0.497865	(+)	N-term
0	17	T	2.15313	2.35461	2.25387	8	1.0774	0.478022	Nucleophilic	N-term
0	17	V	1.79924	1.80343	1.80134	7	1.22774	0.681573	Hydrophobic	N-term
0	17	W	1.92783	2.64832	2.28808	8	1.26762	0.55401	Aromatic	N-term
0	17	Y	0.801362	2.35298	1.57717	4	1.46648	0.929815	Aromatic	N-term
0	18	A	1.20752	1.50471	1.35611	10	1.01236	0.746514	Small	N-term
0	18	C	1.22612	1.50879	1.36746	10	1.03929	0.760018	Nucleophilic	N-term
0	18	D	0.656618	0.911585	0.784101	9	0.628409	0.801438	(-)	N-term
0	18	E	1.0787	1.59471	1.3367	7	0.365026	0.273079	(-)	N-term
0	18	F	2.19333	2.33223	2.26278	4	1.67349	0.739572	Aromatic	N-term
0	18	G	1.74552	3.331	2.53826	4	1.81426	0.714767	Small	N-term
0	18	I	1.48884	2.37637	1.9326	5	0.977611	0.505852	Hydrophobic	N-term
0	18	K	1.13004	1.91784	1.52394	2	0.534772	0.350914	(+)	N-term
0	18	L	2.64503	3.23727	2.94115	5	1.93825	0.659011	Hydrophobic	N-term
0	18	M	1.91051	3.01689	2.4637	6	0.950906	0.385967	Hydrophobic	N-term
0	18	P	1.55953	1.7592	1.65936	5	0.540506	0.325731	Proline	N-term
0	18	Q	1.68098	1.87381	1.7774	12	0.721597	0.405985	Amide	N-term
0	18	R	0.730029	1.06442	0.897225	4	0.801816	0.893662	(+)	N-term
0	18	S	1.09786	1.55828	1.32807	16	1.21264	0.913082	Nucleophilic	N-term
0	18	T	0.981526	1.98718	1.48435	9	1.36766	0.921383	Nucleophilic	N-term
0	18	V	1.99716	2.44096	2.21906	9	1.56009	0.70304	Hydrophobic	N-term
0	18	W	2.64942	3.0266	2.83801	4	1.3012	0.458489	Aromatic	N-term
0	18	Y	1.12182	1.3068	1.21431	4	0.523608	0.431197	Aromatic	N-term
0	19	C	1.77528	2.43385	2.10457	9	1.10844	0.526684	Nucleophilic	N-term
0	19	D	2.26329	2.28461	2.27395	9	1.54245	0.67831	(-)	N-term
0	19	E	1.79796	1.84964	1.8238	4	1.06089	0.581694	(-)	N-term
0	19	F	2.5565	2.9844	2.77045	10	1.64109	0.592356	Aromatic	N-term
0	19	G	1.42657	1.64695	1.53676	12	0.848048	0.551842	Small	N-term
0	19	H	2.65608	3.12172	2.8889	11	2.77241	0.959678	(+)	N-term
0	19	I	1.49017	2.25189	1.87103	12	1.40099	0.74878	Hydrophobic	N-term
0	19	K	1.85889	2.16729	2.01309	8	1.53437	0.762195	(+)	N-term
0	19	L	2.17405	2.21861	2.19633	5	0.387578	0.176466	Hydrophobic	N-term
0	19	M	0.869546	0.871828	0.870687	12	0.558034	0.640912	Hydrophobic	N-term
0	19	N	1.63937	1.92676	1.78306	9	1.22951	0.68955	Amide	N-term
0	19	P	1.32487	1.67606	1.50047	3	0.6582	0.438664	Proline	N-term
0	19	Q	1.55051	2.94735	2.24893	4	1.70367	0.757548	Amide	N-term
0	19	R	2.07335	3.39826	2.73581	8	0.971391	0.355066	(+)	N-term
0	19	S	1.77708	2.20081	1.98894	11	1.26977	0.638416	Nucleophilic	N-term
0	19	T	0.866102	1.15526	1.01068	9	0.596126	0.589826	Nucleophilic	N-term
0	19	V	1.5962	2.04729	1.82175	11	1.34269	0.737035	Hydrophobic	N-term
0	19	W	1.38153	2.92796	2.15475	9	1.68424	0.781641	Aromatic	N-term
0	19	Y	0.0632315	0.0637893	0.0635104	1	NA	NA	Aromatic	N-term
0	20	A	2.0539	3.34254	2.69822	11	2.30769	0.855265	Small	N-term
0	20	C	1.51659	1.69723	1.60691	10	1.0703	0.666058	Nucleophilic	N-term
0	20	D	0.580115	1.1971	0.888607	11	1.26173	1.4199	(-)	N-term
0	20	E	1.39144	1.60695	1.49919	9	0.758672	0.506054	(-)	N-term
0	20	F	2.57769	3.86447	3.22108	11	1.72946	0.536919	Aromatic	N-term
0	20	G	1.13526	2.96822	2.05174	7	1.83333	0.893547	Small	N-term
0	20	I	1.42792	3.32566	2.37679	6	1.92964	0.811867	Hydrophobic	N-term
0	20	K	2.64919	3.36933	3.00926	8	1.52518	0.506829	(+)	N-term
0	20	L	2.86256	3.48813	3.17535	8	1.77112	0.557773	Hydrophobic	N-term
0	20	M	0.514989	0.909343	0.712166	6	1.15397	1.62037	Hydrophobic	N-term
0	20	N	1.48082	1.64629	1.56355	10	1.00149	0.640523	Amide	N-term
0	20	Q	1.26358	2.50974	1.88666	4	1.11592	0.591482	Amide	N-term
0	20	R	1.77886	2.43193	2.10539	18	0.984954	0.467824	(+)	N-term
0	20	S	1.61243	1.71263	1.66253	9	0.9328	0.561072	Nucleophilic	N-term
0	20	T	1.31053	1.63151	1.47102	10	0.745105	0.506522	Nucleophilic	N-term
0	20	V	2.40907	2.83651	2.62279	10	1.25519	0.478571	Hydrophobic	N-term
0	20	W	1.6459	2.18458	1.91524	5	1.42322	0.743104	Aromatic	N-term
0	20	Y	2.28741	2.58747	2.43744	7	1.01136	0.414927	Aromatic	N-term
0	21	C	1.81994	2.59144	2.20569	16	1.52255	0.690282	Nucleophilic	N-term
0	21	E	1.20742	2.15258	1.68	9	1.67896	0.999383	(-)	N-term
0	21	F	1.51259	2.14895	1.83077	13	1.39768	0.763439	Aromatic	N-term
0	21	G	1.41225	3.13315	2.2727	6	1.55644	0.684844	Small	N-term
0	21	H	1.58031	2.32455	1.95243	4	1.74649	0.894524	(+)	N-term
0	21	I	1.66268	1.67412	1.6684	5	0.737879	0.442267	Hydrophobic	N-term
0	21	K	1.62338	1.74597	1.68467	4	0.773894	0.459373	(+)	N-term
0	21	L	1.89291	2.25974	2.07632	6	0.891854	0.429535	Hydrophobic	N-term
0	21	M	2.54409	4.5962	3.57015	3	1.2873	0.360573	Hydrophobic	N-term
0	21	N	2.25796	3.0498	2.65388	3	0.730253	0.275164	Amide	N-term
0	21	P	1.23794	1.37028	1.30411	5	0.778156	0.596693	Proline	N-term
0	21	Q	1.55987	1.85191	1.70589	8	0.817674	0.479324	Amide	N-term
0	21	R	0.889044	28.4003	14.6447	1	NA	NA	(+)	N-term
0	21	S	2.76161	3.99585	3.37873	8	1.54519	0.45733	Nucleophilic	N-term
0	21	T	1.37418	2.12664	1.75041	4	1.52379	0.870533	Nucleophilic	N-term
0	21	V	3.24179	3.33558	3.28869	8	1.67882	0.510485	Hydrophobic	N-term
0	21	W	4.64498	4.65762	4.6513	4	2.31717	0.498176	Aromatic	N-term
0	21	Y	1.43656	1.86187	1.64922	11	1.44187	0.874273	Aromatic	N-term
0	22	A	0.8199	1.02576	0.922829	9	0.938085	1.01653	Small	N-term
0	22	C	2.65599	3.32928	2.99264	11	2.76746	0.924758	Nucleophilic	N-term
0	22	D	1.58766	1.66314	1.6254	5	0.731144	0.449823	(-)	N-term
0	22	E	1.97221	2.59368	2.28295	4	0.666199	0.291815	(-)	N-term
0	22	F	2.68296	3.20216	2.94256	15	1.83641	0.624085	Aromatic	N-term
0	22	G	1.11695	1.75874	1.43784	2	0.332287	0.231101	Small	N-term
0	22	I	1.54735	1.84901	1.69818	10	0.915671	0.539207	Hydrophobic	N-term
0	22	K	2.05138	2.44346	2.24742	11	1.24488	0.553913	(+)	N-term
0	22	L	2.1903	2.31779	2.25405	15	1.65123	0.732563	Hydrophobic	N-term
0	22	M	2.41249	2.92291	2.6677	4	1.09352	0.409909	Hydrophobic	N-term
0	22	N	1.68119	1.89389	1.78754	5	0.683733	0.382499	Amide	N-term
0	22	P	0.977247	2.05709	1.51717	5	0.936189	0.617063	Proline	N-term
0	22	Q	2.35583	2.71854	2.53719	4	1.19167	0.469684	Amide	N-term
0	22	R	0.605611	1.72405	1.16483	8	1.12982	0.969945	(+)	N-term
0	22	S	1.70735	2.50059	2.10397	6	1.16333	0.55292	Nucleophilic	N-term
0	22	T	1.98565	3.30461	2.64513	4	0.531124	0.200793	Nucleophilic	N-term
0	22	V	2.20236	2.23234	2.21735	17	1.24911	0.563332	Hydrophobic	N-term
0	22	W	0.748609	1.10647	0.927541	5	1.04518	1.12683	Aromatic	N-term
0	22	Y	1.739	2.34465	2.04182	6	2.03127	0.994831	Aromatic	N-term
0	23	A	2.01308	2.59696	2.30502	6	0.83673	0.363004	Small	N-term
0	23	C	2.41832	2.57283	2.49557	7	1.22776	0.491974	Nucleophilic	N-term
0	23	E	1.51131	1.70322	1.60726	9	0.957099	0.595484	(-)	N-term
0	23	F	1.87427	2.14309	2.00868	17	1.32025	0.657272	Aromatic	N-term
0	23	G	1.13167	1.23032	1.18099	7	0.831556	0.704117	Small	N-term
0	23	H	1.97076	2.35027	2.16052	4	1.15643	0.535256	(+)	N-term
0	23	I	1.01086	1.30578	1.15832	5	0.866645	0.748191	Hydrophobic	N-term
0	23	K	2.56979	3.10064	2.83522	8	1.34456	0.474237	(+)	N-term
0	23	L	1.79205	1.93175	1.8619	16	1.19071	0.639513	Hydrophobic	N-term
0	23	M	1.54411	2.39943	1.97177	5	0.725646	0.368017	Hydrophobic	N-term
0	23	N	1.45126	2.0132	1.73223	11	0.833331	0.481074	Amide	N-term
0	23	Q	1.40919	1.63897	1.52408	4	1.05134	0.68982	Amide	N-term
0	23	R	1.94462	2.50318	2.2239	7	1.20372	0.541263	(+)	N-term
0	23	S	1.88698	2.38691	2.13695	9	1.09822	0.513918	Nucleophilic	N-term
0	23	T	1.19106	1.47964	1.33535	5	0.710254	0.531886	Nucleophilic	N-term
0	23	V	1.75314	2.37755	2.06535	4	1.72926	0.837274	Hydrophobic	N-term
0	23	W	1.67018	2.55929	2.11474	7	2.37176	1.12154	Aromatic	N-term
0	23	Y	1.29559	2.81518	2.05538	2	0.698301	0.339742	Aromatic	N-term
0	24	A	1.307	1.49012	1.39856	4	0.745484	0.533037	Small	N-term
0	24	C	1.31554	1.99443	1.65499	12	0.979171	0.591649	Nucleophilic	N-term
0	24	D	2.93823	3.18032	3.05927	8	2.053	0.671073	(-)	N-term
0	24	E	2.39495	2.64375	2.51935	6	0.537719	0.213436	(-)	N-term
0	24	F	2.05753	2.30715	2.18234	6	0.983445	0.450638	Aromatic	N-term
0	24	G	1.59955	2.63081	2.11518	4	1.06839	0.505106	Small	N-term
0	24	H	1.71754	3.06748	2.39251	7	1.47326	0.615779	(+)	N-term
0	24	I	2.70487	2.8077	2.75629	4	0.970532	0.352116	Hydrophobic	N-term
0	24	K	1.91682	2.43447	2.17564	12	1.96449	0.902945	(+)	N-term
0	24	L	1.40894	1.60283	1.50589	7	0.810821	0.538434	Hydrophobic	N-term
0	24	M	1.56998	2.56592	2.06795	6	0.674472	0.326155	Hydrophobic	N-term
0	24	N	1.77062	2.18263	1.97662	9	0.830646	0.420234	Amide	N-term
0	24	P	1.49814	1.79107	1.64461	13	1.31616	0.800287	Proline	N-term
0	24	Q	1.07032	1.38096	1.22564	8	0.871347	0.710931	Amide	N-term
0	24	R	2.05497	2.3108	2.18288	4	0.921635	0.42221	(+)	N-term
0	24	S	2.14748	3.76985	2.95866	6	1.43149	0.48383	Nucleophilic	N-term
0	24	T	1.02212	1.44684	1.23448	10	1.01654	0.823453	Nucleophilic	N-term
0	24	W	1.19057	1.19419	1.19238	5	0.930074	0.780015	Aromatic	N-term
0	24	Y	1.48504	1.97609	1.73056	5	1.12328	0.649085	Aromatic	N-term
0	25	A	1.18384	1.79432	1.48908	8	0.943366	0.633523	Small	N-term
0	25	C	2.24084	3.80639	3.02362	10	1.84437	0.609989	Nucleophilic	N-term
0	25	D	1.58262	1.63219	1.6074	9	0.518911	0.322825	(-)	N-term
0	25	E	1.47438	1.98472	1.72955	6	1.09824	0.634987	(-)	N-term
0	25	F	2.70053	5.04885	3.87469	8	2.6315	0.679151	Aromatic	N-term
0	25	G	1.50439	2.10945	1.80692	5	0.815869	0.451525	Small	N-term
0	25	H	1.17295	2.32412	1.74854	11	1.20676	0.690155	(+)	N-term
0	25	I	1.65825	1.77073	1.71449	6	0.581322	0.339065	Hydrophobic	N-term
0	25	K	1.68629	1.92226	1.80427	10	0.99848	0.553397	(+)	N-term
0	25	L	1.56781	2.18202	1.87491	12	0.963913	0.514111	Hydrophobic	N-term
0	25	M	1.83035	3.48477	2.65756	6	0.767398	0.28876	Hydrophobic	N-term
0	25	N	1.64046	3.85377	2.74711	4	2.00442	0.729646	Amide	N-term
0	25	P	1.58667	2.78082	2.18375	6	2.28413	1.04597	Proline	N-term
0	25	Q	1.75829	1.78257	1.77043	13	1.18937	0.6718	Amide	N-term
0	25	R	1.47419	2.31255	1.89337	6	0.692481	0.36574	(+)	N-term
0	25	S	1.41309	1.53871	1.4759	11	0.669712	0.453765	Nucleophilic	N-term
0	25	V	1.9663	2.7691	2.3677	10	1.26944	0.53615	Hydrophobic	N-term
0	25	W	1.94493	2.72243	2.33368	7	1.28006	0.548517	Aromatic	N-term
0	25	Y	2.12732	3.20115	2.66423	8	1.03804	0.38962	Aromatic	N-term
0	26	A	2.1069	2.18677	2.14684	11	0.728617	0.339391	Small	TM1
0	26	C	1.04085	2.18864	1.61475	5	0.659511	0.40843	Nucleophilic	TM1
0	26	D	1.60997	2.19899	1.90448	7	1.42443	0.747937	(-)	TM1
0	26	E	1.30683	1.76701	1.53692	7	0.822043	0.534863	(-)	TM1
0	26	F	1.69704	1.8237	1.76037	10	1.10565	0.628079	Aromatic	TM1
0	26	G	2.43607	2.62628	2.53118	6	1.22013	0.48204	Small	TM1
0	26	H	1.70808	1.78233	1.7452	1	NA	NA	(+)	TM1
0	26	I	1.99646	2.89089	2.44367	12	1.47562	0.603855	Hydrophobic	TM1
0	26	K	1.17434	1.55987	1.3671	6	0.439479	0.321467	(+)	TM1
0	26	L	1.92055	2.12597	2.02326	9	0.585733	0.289499	Hydrophobic	TM1
0	26	M	0.96743	1.14537	1.0564	7	0.803355	0.760466	Hydrophobic	TM1
0	26	N	1.64897	2.00947	1.82922	4	0.917932	0.501815	Amide	TM1
0	26	P	1.92159	2.1463	2.03395	5	0.896408	0.440723	Proline	TM1
0	26	R	2.32649	2.52589	2.42619	5	1.28045	0.52776	(+)	TM1
0	26	S	1.74687	2.14809	1.94748	5	1.32245	0.679059	Nucleophilic	TM1
0	26	T	1.49001	2.58453	2.03727	3	0.801525	0.39343	Nucleophilic	TM1
0	26	V	1.67971	2.51904	2.09937	9	1.69353	0.806681	Hydrophobic	TM1
0	26	W	1.96592	5.30079	3.63336	5	2.52286	0.694362	Aromatic	TM1
0	26	Y	2.48969	3.19741	2.84355	9	1.89981	0.668112	Aromatic	TM1
0	27	A	1.77118	3.77261	2.7719	7	1.34532	0.485342	Small	TM1
0	27	C	1.7636	2.03431	1.89896	8	1.28949	0.679053	Nucleophilic	TM1
0	27	D	1.36556	3.19752	2.28154	6	1.14386	0.501356	(-)	TM1
0	27	F	2.39392	2.6431	2.51851	16	1.4743	0.585386	Aromatic	TM1
0	27	G	1.67606	2.73386	2.20496	7	1.46485	0.664342	Small	TM1
0	27	H	2.09411	2.63514	2.36462	5	0.475316	0.201012	(+)	TM1
0	27	I	2.64474	3.03337	2.83905	6	0.974656	0.343303	Hydrophobic	TM1
0	27	K	0.406493	0.904225	0.655359	4	0.449533	0.685934	(+)	TM1
0	27	L	2.39578	4.65347	3.52463	8	2.885	0.818526	Hydrophobic	TM1
0	27	M	1.95088	3.28509	2.61798	8	1.94436	0.742695	Hydrophobic	TM1
0	27	N	1.26298	1.68094	1.47196	7	0.953065	0.647481	Amide	TM1
0	27	P	2.40428	2.71594	2.56011	15	1.55214	0.606278	Proline	TM1
0	27	Q	1.78157	3.17028	2.47593	7	1.41572	0.571794	Amide	TM1
0	27	R	1.6939	1.99594	1.84492	5	0.858972	0.465586	(+)	TM1
0	27	S	1.4225	1.54634	1.48442	5	0.511757	0.344752	Nucleophilic	TM1
0	27	T	1.30696	3.4959	2.40143	6	1.36817	0.569731	Nucleophilic	TM1
0	27	V	1.32476	1.33296	1.32886	6	0.997367	0.750543	Hydrophobic	TM1
0	27	W	2.43831	2.67735	2.55783	11	1.43239	0.560003	Aromatic	TM1
0	27	Y	3.88005	4.05661	3.96833	8	3.28186	0.827014	Aromatic	TM1
0	28	A	1.329	2.26345	1.79622	7	1.34968	0.7514	Small	TM1
0	28	C	1.43627	2.08159	1.75893	7	0.89306	0.507728	Nucleophilic	TM1
0	28	D	1.08295	1.44972	1.26634	4	0.953023	0.752582	(-)	TM1
0	28	E	1.39786	1.90322	1.65054	6	1.0983	0.665417	(-)	TM1
0	28	F	3.49071	4.8004	4.14556	7	2.61925	0.631821	Aromatic	TM1
0	28	G	1.55371	2.46446	2.00908	3	0.673361	0.335158	Small	TM1
0	28	H	1.46997	1.66785	1.56891	5	0.894087	0.569878	(+)	TM1
0	28	I	1.39404	2.08943	1.74173	4	0.974429	0.559459	Hydrophobic	TM1
0	28	K	1.67946	1.71825	1.69885	4	0.844532	0.497119	(+)	TM1
0	28	L	1.90915	2.48294	2.19604	7	1.37622	0.62668	Hydrophobic	TM1
0	28	M	2.28039	3.31745	2.79892	6	1.89412	0.676732	Hydrophobic	TM1
0	28	N	2.42992	3.62511	3.02752	5	2.81484	0.929753	Amide	TM1
0	28	P	2.44825	3.28776	2.868	10	1.89258	0.659895	Proline	TM1
0	28	Q	0.667289	1.01405	0.840668	5	0.669045	0.795849	Amide	TM1
0	28	S	2.21761	3.70372	2.96067	3	1.35649	0.458171	Nucleophilic	TM1
0	28	T	2.32907	5.03229	3.68068	5	3.27408	0.889532	Nucleophilic	TM1
0	28	V	1.45461	2.99316	2.22389	11	1.73288	0.779214	Hydrophobic	TM1
0	28	W	2.4893	3.75351	3.12141	6	2.03505	0.651966	Aromatic	TM1
0	28	Y	1.18256	1.37758	1.28007	4	1.10057	0.859772	Aromatic	TM1
0	29	A	1.63299	2.14199	1.88749	10	1.01066	0.53545	Small	TM1
0	29	C	1.21496	1.56906	1.39201	7	0.822868	0.591136	Nucleophilic	TM1
0	29	E	1.10702	1.45219	1.27961	3	0.770809	0.602379	(-)	TM1
0	29	F	3.02686	3.36496	3.19591	14	2.20381	0.689572	Aromatic	TM1
0	29	G	2.08061	3.40513	2.74287	8	1.78559	0.650994	Small	TM1
0	29	H	1.40026	3.2095	2.30488	9	2.13558	0.926545	(+)	TM1
0	29	I	1.88685	2.42876	2.1578	7	1.01062	0.468358	Hydrophobic	TM1
0	29	K	1.75829	2.44089	2.09959	9	0.988593	0.470851	(+)	TM1
0	29	L	2.07817	3.2525	2.66533	7	1.59096	0.596908	Hydrophobic	TM1
0	29	M	2.09805	2.67982	2.38893	8	1.36188	0.57008	Hydrophobic	TM1
0	29	N	1.36354	1.51636	1.43995	6	1.05821	0.734893	Amide	TM1
0	29	P	1.94263	3.09313	2.51788	11	3.00564	1.19372	Proline	TM1
0	29	Q	1.95383	2.34223	2.14803	6	1.01226	0.471251	Amide	TM1
0	29	R	2.10766	2.26954	2.1886	10	1.33383	0.609444	(+)	TM1
0	29	S	2.72184	3.93441	3.32813	3	1.5304	0.459838	Nucleophilic	TM1
0	29	T	1.72957	3.15815	2.44386	6	2.01892	0.82612	Nucleophilic	TM1
0	29	V	2.30476	3.13862	2.72169	9	1.4744	0.541724	Hydrophobic	TM1
0	29	W	2.33837	2.45839	2.39838	9	1.70126	0.709338	Aromatic	TM1
0	29	Y	1.49563	1.61568	1.55566	9	1.10169	0.708185	Aromatic	TM1
0	30	A	1.15396	1.50403	1.32899	9	0.932115	0.701369	Small	TM1
0	30	C	1.59906	1.69817	1.64862	19	0.866014	0.525297	Nucleophilic	TM1
0	30	D	1.28249	2.10049	1.69149	11	1.81675	1.07406	(-)	TM1
0	30	F	1.09646	2.2391	1.66778	7	2.26928	1.36066	Aromatic	TM1
0	30	G	2.37273	2.93762	2.65517	14	1.18544	0.446463	Small	TM1
0	30	H	2.39315	2.65597	2.52456	8	2.52027	0.9983	(+)	TM1
0	30	I	1.54472	1.94095	1.74284	6	1.18739	0.681296	Hydrophobic	TM1
0	30	K	1.74796	1.97119	1.85958	6	1.01774	0.547296	(+)	TM1
0	30	L	1.47107	3.41428	2.44267	8	1.50376	0.615621	Hydrophobic	TM1
0	30	M	1.74324	2.66431	2.20378	6	1.16945	0.530656	Hydrophobic	TM1
0	30	N	1.74505	4.52615	3.1356	6	2.10281	0.670624	Amide	TM1
0	30	P	2.02556	2.4512	2.23838	14	1.17706	0.525856	Proline	TM1
0	30	Q	1.06689	1.89535	1.48112	4	1.26686	0.855341	Amide	TM1
0	30	R	1.02568	2.02391	1.52479	8	0.902458	0.591856	(+)	TM1
0	30	S	1.40144	2.40473	1.90309	9	1.72803	0.908014	Nucleophilic	TM1
0	30	T	1.45719	3.01154	2.23437	10	1.88408	0.843228	Nucleophilic	TM1
0	30	V	2.27232	2.492	2.38216	16	1.4028	0.588876	Hydrophobic	TM1
0	30	W	1.73927	1.88463	1.81195	11	0.998866	0.551266	Aromatic	TM1
0	30	Y	1.6912	2.3387	2.01495	7	1.20733	0.599189	Aromatic	TM1
0	31	A	1.64039	2.24756	1.94398	3	0.540749	0.278166	Small	TM1
0	31	C	1.06066	1.18103	1.12085	3	0.717242	0.63991	Nucleophilic	TM1
0	31	D	1.51274	1.60121	1.55697	13	1.05655	0.67859	(-)	TM1
0	31	E	1.77946	2.56765	2.17356	8	1.59032	0.731667	(-)	TM1
0	31	F	2.444	2.93786	2.69093	5	0.534186	0.198513	Aromatic	TM1
0	31	G	0.823621	1.08796	0.955788	7	0.681391	0.71291	Small	TM1
0	31	H	1.82749	1.89421	1.86085	11	0.682548	0.366794	(+)	TM1
0	31	I	2.36894	2.5936	2.48127	6	1.98186	0.798728	Hydrophobic	TM1
0	31	K	1.13274	1.55323	1.34299	13	1.02589	0.763885	(+)	TM1
0	31	L	1.77106	3.28966	2.53036	8	1.04333	0.412324	Hydrophobic	TM1
0	31	M	1.1671	1.84677	1.50693	7	1.07492	0.713314	Hydrophobic	TM1
0	31	N	1.37667	2.50891	1.94279	6	1.19718	0.616218	Amide	TM1
0	31	P	2.42879	3.48257	2.95568	7	2.32356	0.786136	Proline	TM1
0	31	Q	2.04187	2.58127	2.31157	9	1.24162	0.537135	Amide	TM1
0	31	R	1.58091	1.98276	1.78184	8	0.515794	0.289473	(+)	TM1
0	31	S	2.32331	2.62007	2.47169	8	0.4653	0.188252	Nucleophilic	TM1
0	31	T	1.28705	1.3285	1.30777	5	0.894456	0.683955	Nucleophilic	TM1
0	31	W	1.34647	2.0745	1.71048	7	1.16994	0.683982	Aromatic	TM1
0	31	Y	1.89751	2.02978	1.96365	7	1.12466	0.572743	Aromatic	TM1
0	32	A	1.45765	1.65043	1.55404	5	0.788411	0.507331	Small	TM1
0	32	C	1.15915	1.22386	1.1915	13	0.578815	0.485786	Nucleophilic	TM1
0	32	D	1.59918	1.68474	1.64196	8	0.834472	0.508217	(-)	TM1
0	32	E	2.34696	2.36819	2.35758	11	1.19533	0.507016	(-)	TM1
0	32	F	1.22495	1.32409	1.27452	3	0.545578	0.428065	Aromatic	TM1
0	32	G	1.39544	1.58035	1.48789	10	0.402085	0.270238	Small	TM1
0	32	H	1.75786	2.06873	1.91329	13	0.741077	0.387331	(+)	TM1
0	32	I	1.57323	2.23104	1.90214	11	1.49101	0.783861	Hydrophobic	TM1
0	32	K	1.48936	2.95969	2.22452	13	2.54831	1.14555	(+)	TM1
0	32	L	0.910747	1.43516	1.17296	6	0.748934	0.638502	Hydrophobic	TM1
0	32	M	1.40621	2.08585	1.74603	7	1.37555	0.787815	Hydrophobic	TM1
0	32	N	0.767177	1.00655	0.886865	10	0.581259	0.655408	Amide	TM1
0	32	P	1.18843	1.20591	1.19717	13	0.647104	0.540529	Proline	TM1
0	32	Q	1.74179	2.01078	1.87628	4	0.916503	0.488467	Amide	TM1
0	32	R	1.5979	2.20152	1.89971	8	0.943182	0.496487	(+)	TM1
0	32	S	1.50574	4.02755	2.76664	14	4.25883	1.53935	Nucleophilic	TM1
0	32	T	1.87651	1.95722	1.91687	7	1.18554	0.618476	Nucleophilic	TM1
0	32	V	1.8982	2.54204	2.22012	8	1.02765	0.46288	Hydrophobic	TM1
0	32	Y	1.93792	2.02316	1.98054	5	1.00586	0.507872	Aromatic	TM1
0	33	A	1.41891	1.61002	1.51446	10	0.941264	0.621516	Small	TM1
0	33	C	1.55483	2.49902	2.02692	8	1.16925	0.576861	Nucleophilic	TM1
0	33	D	1.70654	2.93661	2.32157	8	2.47196	1.06478	(-)	TM1
0	33	E	1.29961	1.36392	1.33176	7	0.982965	0.738093	(-)	TM1
0	33	F	1.03243	3.15474	2.09358	4	1.69529	0.809756	Aromatic	TM1
0	33	G	0.770377	0.877729	0.824053	6	0.499804	0.606519	Small	TM1
0	33	H	1.0056	2.20314	1.60437	1	NA	NA	(+)	TM1
0	33	I	2.90903	3.80292	3.35598	6	1.52327	0.453898	Hydrophobic	TM1
0	33	K	1.12715	1.32605	1.2266	7	0.726128	0.591984	(+)	TM1
0	33	L	1.85052	2.00963	1.93008	9	1.04854	0.543264	Hydrophobic	TM1
0	33	M	1.7321	2.96477	2.34843	7	1.2984	0.552879	Hydrophobic	TM1
0	33	N	0.701452	0.729691	0.715572	4	0.617307	0.862676	Amide	TM1
0	33	P	1.68019	1.94025	1.81022	7	0.787839	0.435217	Proline	TM1
0	33	Q	2.14286	2.40018	2.27152	7	1.12857	0.496833	Amide	TM1
0	33	R	2.01362	3.3413	2.67746	7	1.34021	0.500555	(+)	TM1
0	33	S	2.03814	2.7398	2.38897	7	1.42111	0.594863	Nucleophilic	TM1
0	33	T	1.96599	2.12385	2.04492	2	1.2345	0.603691	Nucleophilic	TM1
0	33	W	0.985841	1.00916	0.997499	5	0.775749	0.777694	Aromatic	TM1
0	33	Y	0.988354	1.27476	1.13156	4	0.550957	0.486902	Aromatic	TM1
0	34	A	0.814179	1.24209	1.02813	9	0.990961	0.963845	Small	TM1
0	34	C	2.48142	2.97857	2.72999	5	1.19654	0.438294	Nucleophilic	TM1
0	34	D	1.25203	1.77179	1.51191	4	1.03258	0.682964	(-)	TM1
0	34	E	1.28879	1.52734	1.40806	3	0.341663	0.242648	(-)	TM1
0	34	F	2.12569	2.48603	2.30586	8	0.946475	0.410465	Aromatic	TM1
0	34	G	2.23848	2.42746	2.33297	8	1.50767	0.646246	Small	TM1
0	34	H	1.69129	2.19367	1.94248	7	1.16201	0.59821	(+)	TM1
0	34	I	1.67824	1.99874	1.83849	13	0.898927	0.488949	Hydrophobic	TM1
0	34	K	2.07965	2.32516	2.20241	5	0.487083	0.22116	(+)	TM1
0	34	L	0.965459	1.74408	1.35477	6	0.892251	0.6586	Hydrophobic	TM1
0	34	M	1.83226	1.93173	1.882	9	1.04873	0.557243	Hydrophobic	TM1
0	34	N	1.20275	1.91792	1.56034	5	0.590858	0.378673	Amide	TM1
0	34	P	0.988347	1.14249	1.06542	7	0.706288	0.662922	Proline	TM1
0	34	Q	2.32241	2.65805	2.49023	12	1.89738	0.761931	Amide	TM1
0	34	R	1.53778	1.80764	1.67271	18	0.789896	0.472226	(+)	TM1
0	34	S	0.944662	1.22504	1.08485	6	0.888934	0.819404	Nucleophilic	TM1
0	34	T	2.01785	2.34435	2.1811	10	1.09626	0.50262	Nucleophilic	TM1
0	34	W	1.83814	3.77367	2.8059	10	1.34968	0.481015	Aromatic	TM1
0	34	Y	1.24395	2.89548	2.06972	5	0.943327	0.455776	Aromatic	TM1
0	35	A	2.26551	3.22997	2.74774	9	2.42302	0.881822	Small	TM1
0	35	C	1.71812	1.91086	1.81449	6	0.765249	0.421743	Nucleophilic	TM1
0	35	D	1.40249	1.45014	1.42631	8	0.402442	0.282155	(-)	TM1
0	35	E	1.07115	1.52623	1.29869	9	0.794935	0.612105	(-)	TM1
0	35	F	2.37861	3.12644	2.75253	8	0.995739	0.361755	Aromatic	TM1
0	35	H	1.08412	2.52197	1.80305	9	1.3745	0.762318	(+)	TM1
0	35	I	2.40868	2.89886	2.65377	5	1.13669	0.42833	Hydrophobic	TM1
0	35	K	2.27553	2.46779	2.37166	8	1.31702	0.555316	(+)	TM1
0	35	L	0.963959	1.50511	1.23453	8	0.833161	0.67488	Hydrophobic	TM1
0	35	M	0.894205	1.32671	1.11046	7	0.821953	0.740192	Hydrophobic	TM1
0	35	N	1.15347	1.75428	1.45388	4	0.849043	0.583986	Amide	TM1
0	35	P	2.34646	3.11137	2.72892	12	2.6436	0.968735	Proline	TM1
0	35	Q	1.34076	1.34603	1.3434	4	0.812344	0.604695	Amide	TM1
0	35	R	1.20957	1.35971	1.28464	10	0.585201	0.455538	(+)	TM1
0	35	S	0.983734	1.13173	1.05773	9	0.788099	0.745082	Nucleophilic	TM1
0	35	T	1.72042	2.46853	2.09447	9	0.789733	0.377056	Nucleophilic	TM1
0	35	V	1.39299	1.61488	1.50393	3	0.982897	0.653551	Hydrophobic	TM1
0	35	W	2.16891	3.03914	2.60402	7	2.21801	0.851764	Aromatic	TM1
0	35	Y	1.60841	1.63223	1.62032	8	0.846413	0.522373	Aromatic	TM1
0	36	A	1.90221	3.42099	2.6616	2	1.57085	0.590192	Small	TM1
0	36	C	0.860834	1.62901	1.24492	5	1.28405	1.03143	Nucleophilic	TM1
0	36	D	1.25165	1.36055	1.3061	7	0.488308	0.373867	(-)	TM1
0	36	E	0.951951	1.14114	1.04654	8	0.825031	0.788339	(-)	TM1
0	36	F	1.47698	1.94487	1.71092	11	0.657082	0.384051	Aromatic	TM1
0	36	G	1.47034	2.2437	1.85702	6	1.13474	0.611054	Small	TM1
0	36	H	1.84982	1.8885	1.86916	11	1.15528	0.618077	(+)	TM1
0	36	I	1.71976	2.66345	2.19161	6	1.51253	0.690147	Hydrophobic	TM1
0	36	K	1.06197	2.11333	1.58765	9	0.971326	0.611801	(+)	TM1
0	36	L	0.164685	1.42578	0.795235	4	1.38662	1.74366	Hydrophobic	TM1
0	36	N	1.74735	2.65771	2.20253	8	1.71984	0.780849	Amide	TM1
0	36	P	0.919807	1.74232	1.33106	8	1.12059	0.841875	Proline	TM1
0	36	Q	1.00111	1.36393	1.18252	6	0.430317	0.363899	Amide	TM1
0	36	R	1.24931	1.38958	1.31944	7	0.537683	0.407508	(+)	TM1
0	36	S	1.74577	1.84163	1.7937	3	0.531237	0.296169	Nucleophilic	TM1
0	36	T	1.77938	1.82653	1.80295	7	1.0055	0.557697	Nucleophilic	TM1
0	36	V	2.13101	2.41877	2.27489	8	1.09635	0.481936	Hydrophobic	TM1
0	36	W	1.18304	1.80651	1.49478	10	0.714818	0.478211	Aromatic	TM1
0	36	Y	1.76655	1.86729	1.81692	12	1.00125	0.55107	Aromatic	TM1
0	37	A	1.32828	1.74605	1.53716	8	0.893196	0.581068	Small	TM1
0	37	C	2.93494	3.65089	3.29291	10	2.09183	0.635252	Nucleophilic	TM1
0	37	D	0.856564	1.05198	0.954271	10	0.506038	0.530287	(-)	TM1
0	37	E	1.82592	2.14191	1.98392	9	0.838956	0.422878	(-)	TM1
0	37	F	1.25729	1.33809	1.29769	5	1.253	0.965561	Aromatic	TM1
0	37	H	0.697977	0.726776	0.712377	2	0.689113	0.967344	(+)	TM1
0	37	I	1.79137	2.81016	2.30076	9	1.55845	0.677361	Hydrophobic	TM1
0	37	K	1.37684	2.3524	1.86462	10	2.28245	1.22409	(+)	TM1
0	37	M	0.209046	0.249547	0.229296	4	0.219441	0.957019	Hydrophobic	TM1
0	37	N	1.26868	1.73017	1.49942	12	0.764431	0.509817	Amide	TM1
0	37	Q	0.0700216	0.0706393	0.0703305	1	NA	NA	Amide	TM1
0	37	R	1.05814	1.73552	1.39683	8	0.726246	0.519925	(+)	TM1
0	37	S	2.16906	2.32916	2.24911	3	0.573469	0.254976	Nucleophilic	TM1
0	37	T	2.22371	2.35785	2.29078	8	0.960113	0.419121	Nucleophilic	TM1
0	37	V	1.89983	2.75204	2.32593	7	1.18126	0.507863	Hydrophobic	TM1
0	37	W	1.59103	2.05848	1.82475	5	0.494994	0.271267	Aromatic	TM1
0	37	Y	1.16343	1.85875	1.51109	10	1.00594	0.665707	Aromatic	TM1
0	38	C	2.71267	2.89459	2.80363	4	1.15131	0.410651	Nucleophilic	TM1
0	38	D	1.15072	1.21832	1.18452	16	0.547352	0.462087	(-)	TM1
0	38	E	0.830834	1.07034	0.950589	5	0.549763	0.578339	(-)	TM1
0	38	F	1.40539	2.34487	1.87513	12	1.06621	0.568606	Aromatic	TM1
0	38	G	1.20386	1.2419	1.22288	5	0.546862	0.447192	Small	TM1
0	38	H	1.1928	1.29149	1.24215	6	0.576229	0.463897	(+)	TM1
0	38	K	1.41137	1.58904	1.5002	3	0.387211	0.258106	(+)	TM1
0	38	L	1.81873	2.02811	1.92342	6	0.544423	0.283049	Hydrophobic	TM1
0	38	M	1.60882	1.93792	1.77337	11	0.799595	0.450891	Hydrophobic	TM1
0	38	N	2.40563	2.75076	2.57819	7	2.62626	1.01864	Amide	TM1
0	38	P	1.11964	1.38758	1.25361	8	0.672471	0.536429	Proline	TM1
0	38	Q	1.84941	1.97582	1.91262	11	0.847189	0.442947	Amide	TM1
0	38	R	1.36356	2.22104	1.7923	7	1.03527	0.577622	(+)	TM1
0	38	S	1.36089	2.47147	1.91618	7	1.47002	0.767159	Nucleophilic	TM1
0	38	T	1.59399	1.80715	1.70057	13	0.69528	0.40885	Nucleophilic	TM1
0	38	V	2.06088	2.96976	2.51532	5	2.43108	0.966508	Hydrophobic	TM1
0	38	W	1.35046	1.39088	1.37067	4	0.638254	0.465651	Aromatic	TM1
0	38	Y	1.24666	1.87294	1.5598	10	0.643279	0.412411	Aromatic	TM1
0	39	A	1.62181	2.30631	1.96406	9	0.840325	0.427851	Small	TM1
0	39	C	1.587	1.73305	1.66002	10	0.77729	0.468241	Nucleophilic	TM1
0	39	D	1.19491	1.99389	1.5944	9	0.648156	0.40652	(-)	TM1
0	39	E	0.879343	1.30544	1.09239	3	0.21958	0.201009	(-)	TM1
0	39	F	1.79389	1.86258	1.82823	9	1.02645	0.561447	Aromatic	TM1
0	39	G	1.42183	2.2517	1.83677	9	1.00316	0.546153	Small	TM1
0	39	H	1.30625	1.60708	1.45667	10	0.741334	0.508925	(+)	TM1
0	39	I	3.02988	3.11212	3.071	7	1.90236	0.619459	Hydrophobic	TM1
0	39	K	1.22108	1.47286	1.34697	12	0.688499	0.511146	(+)	TM1
0	39	L	1.62743	1.96785	1.79764	14	1.04127	0.579246	Hydrophobic	TM1
0	39	M	2.07272	2.15605	2.11438	4	1.23718	0.585125	Hydrophobic	TM1
0	39	N	1.30869	1.75511	1.5319	7	0.561413	0.366481	Amide	TM1
0	39	P	1.52507	1.54446	1.53476	8	0.594488	0.387348	Proline	TM1
0	39	Q	1.09864	1.24633	1.17248	13	0.443104	0.377919	Amide	TM1
0	39	R	1.21656	1.58387	1.40022	6	0.6638	0.47407	(+)	TM1
0	39	S	1.47118	1.91848	1.69483	6	0.941701	0.555631	Nucleophilic	TM1
0	39	T	1.99201	2.47272	2.23237	5	0.783918	0.35116	Nucleophilic	TM1
0	39	W	0.893969	1.91847	1.40622	4	0.695815	0.494813	Aromatic	TM1
0	39	Y	1.37943	1.88134	1.63039	7	0.770855	0.472805	Aromatic	TM1
0	40	A	1.791	1.8918	1.8414	13	1.0534	0.572064	Small	TM1
0	40	C	1.38817	2.2267	1.80744	3	1.18297	0.6545	Nucleophilic	TM1
0	40	D	1.10844	1.12068	1.11456	9	0.522224	0.468548	(-)	TM1
0	40	E	1.59036	2.11954	1.85495	10	1.59495	0.859834	(-)	TM1
0	40	F	1.79276	1.99563	1.89419	12	1.53432	0.810012	Aromatic	TM1
0	40	G	0.518356	0.791918	0.655137	6	0.48001	0.732686	Small	TM1
0	40	H	1.67539	4.6593	3.16735	7	3.32676	1.05033	(+)	TM1
0	40	I	0.983747	1.09314	1.03844	7	0.772433	0.743838	Hydrophobic	TM1
0	40	K	0.860421	4.59508	2.72775	7	4.95814	1.81767	(+)	TM1
0	40	L	1.16078	1.53717	1.34897	10	0.928001	0.687931	Hydrophobic	TM1
0	40	N	0.910655	1.15244	1.03155	3	0.651761	0.63183	Amide	TM1
0	40	P	1.36312	1.38071	1.37192	13	0.598269	0.436083	Proline	TM1
0	40	Q	1.69748	1.94407	1.82078	6	0.90282	0.495843	Amide	TM1
0	40	R	1.39759	1.83464	1.61612	5	0.520686	0.322184	(+)	TM1
0	40	S	1.86417	1.97115	1.91766	11	0.819924	0.427565	Nucleophilic	TM1
0	40	T	1.10202	2.17759	1.63981	10	1.20623	0.735592	Nucleophilic	TM1
0	40	V	1.47908	1.65842	1.56875	4	0.827747	0.527646	Hydrophobic	TM1
0	40	W	0.972053	1.0632	1.01763	6	0.55014	0.54061	Aromatic	TM1
0	40	Y	1.45059	1.78379	1.61719	3	0.256801	0.158795	Aromatic	TM1
0	41	A	1.2862	1.71035	1.49827	4	0.757718	0.505727	Small	TM1
0	41	C	1.79922	2.25294	2.02608	8	1.18441	0.584583	Nucleophilic	TM1
0	41	D	1.2947	1.33145	1.31308	11	0.596967	0.454633	(-)	TM1
0	41	E	1.48405	2.46221	1.97313	6	1.00118	0.507405	(-)	TM1
0	41	F	2.10988	2.28887	2.19938	9	1.24961	0.568164	Aromatic	TM1
0	41	G	3.19193	3.76867	3.4803	5	1.80196	0.51776	Small	TM1
0	41	H	0.891218	1.464	1.17761	6	0.636057	0.540127	(+)	TM1
0	41	I	1.02463	1.09059	1.05761	3	0.614527	0.581054	Hydrophobic	TM1
0	41	K	1.41126	1.41278	1.41202	8	0.391537	0.277289	(+)	TM1
0	41	L	1.56553	2.34441	1.95497	8	1.02455	0.524076	Hydrophobic	TM1
0	41	M	1.83229	2.65107	2.24168	8	2.0366	0.908514	Hydrophobic	TM1
0	41	N	1.11076	1.41859	1.26467	1	NA	NA	Amide	TM1
0	41	P	1.59191	1.7481	1.67	6	0.609643	0.365054	Proline	TM1
0	41	Q	1.61482	2.32933	1.97207	10	0.95894	0.48626	Amide	TM1
0	41	R	1.59261	1.82684	1.70973	5	1.04373	0.610464	(+)	TM1
0	41	T	1.60931	2.47198	2.04064	14	1.20038	0.588236	Nucleophilic	TM1
0	41	V	2.399	3.41893	2.90897	7	2.07676	0.713916	Hydrophobic	TM1
0	41	W	1.68064	2.30899	1.99482	13	1.13542	0.569186	Aromatic	TM1
0	41	Y	1.61877	1.76931	1.69404	8	1.091	0.644023	Aromatic	TM1
0	42	A	1.31903	1.69109	1.50506	5	1.24578	0.827728	Small	TM1
0	42	C	1.67301	2.02292	1.84796	10	0.828421	0.448288	Nucleophilic	TM1
0	42	D	1.05602	1.08882	1.07242	5	0.562091	0.524134	(-)	TM1
0	42	E	1.09578	1.17096	1.13337	11	0.491604	0.433754	(-)	TM1
0	42	F	0.795503	1.54642	1.17096	5	0.893039	0.762655	Aromatic	TM1
0	42	G	0.631542	1.42082	1.02618	7	1.03193	1.0056	Small	TM1
0	42	H	1.34045	1.53389	1.43717	6	0.67964	0.472901	(+)	TM1
0	42	I	1.88551	2.28623	2.08587	9	2.32214	1.11327	Hydrophobic	TM1
0	42	K	1.47248	1.55046	1.51147	10	0.736913	0.487547	(+)	TM1
0	42	M	2.01929	2.40916	2.21422	10	1.02828	0.464396	Hydrophobic	TM1
0	42	N	1.19963	1.64899	1.42431	10	0.85268	0.598662	Amide	TM1
0	42	P	1.44948	1.64299	1.54623	6	0.924039	0.597606	Proline	TM1
0	42	Q	0.870908	1.25836	1.06464	12	0.688162	0.646382	Amide	TM1
0	42	R	1.40717	1.42561	1.41639	9	0.729383	0.51496	(+)	TM1
0	42	S	2.2817	2.92282	2.60226	7	2.09664	0.805702	Nucleophilic	TM1
0	42	T	2.0379	2.70048	2.36919	9	1.11123	0.469033	Nucleophilic	TM1
0	42	V	1.34335	2.87876	2.11106	4	1.9727	0.934461	Hydrophobic	TM1
0	42	W	1.51716	1.83148	1.67432	9	0.730467	0.436277	Aromatic	TM1
0	42	Y	1.2018	1.38904	1.29542	5	0.861052	0.664691	Aromatic	TM1
0	43	A	1.80941	3.15803	2.48372	12	1.49834	0.603266	Small	TM1
0	43	C	1.23359	1.26643	1.25001	11	0.820878	0.656697	Nucleophilic	TM1
0	43	D	1.44716	4.45137	2.94927	6	3.41738	1.15872	(-)	TM1
0	43	E	2.12847	5.11847	3.62347	9	6.34586	1.75132	(-)	TM1
0	43	F	1.38486	2.27539	1.83012	6	1.10479	0.603672	Aromatic	TM1
0	43	G	1.20704	2.08559	1.64632	5	0.782367	0.475223	Small	TM1
0	43	H	0.466843	0.669645	0.568244	8	0.559631	0.984843	(+)	TM1
0	43	K	1.1113	1.39657	1.25393	14	0.43288	0.345218	(+)	TM1
0	43	L	1.45926	2.07043	1.76484	8	0.890366	0.504501	Hydrophobic	TM1
0	43	M	2.3836	3.13029	2.75694	4	1.14611	0.415718	Hydrophobic	TM1
0	43	N	1.50291	1.81865	1.66078	13	1.08237	0.651725	Amide	TM1
0	43	P	1.14061	1.57675	1.35868	5	0.768487	0.565611	Proline	TM1
0	43	Q	1.19892	1.20149	1.20021	13	0.495081	0.412497	Amide	TM1
0	43	R	1.04142	2.04243	1.54192	2	0.140269	0.09097	(+)	TM1
0	43	S	1.59071	1.7848	1.68775	10	1.13539	0.672722	Nucleophilic	TM1
0	43	T	1.43247	1.65919	1.54583	14	0.945748	0.611806	Nucleophilic	TM1
0	43	V	1.94895	2.50623	2.22759	8	1.29777	0.582591	Hydrophobic	TM1
0	43	W	1.68177	1.76771	1.72474	5	0.508543	0.294852	Aromatic	TM1
0	43	Y	2.49526	3.23836	2.86681	7	1.91364	0.667517	Aromatic	TM1
0	44	A	2.05604	2.82498	2.44051	4	0.802816	0.328954	Small	TM1
0	44	C	1.79589	2.39563	2.09576	8	1.03643	0.494537	Nucleophilic	TM1
0	44	D	2.15356	2.31112	2.23234	7	1.37707	0.616873	(-)	TM1
0	44	E	1.10748	1.53831	1.3229	4	1.01871	0.770061	(-)	TM1
0	44	F	5.15681	5.22525	5.19103	6	4.49524	0.865963	Aromatic	TM1
0	44	G	2.45054	2.50804	2.47929	7	1.45926	0.588581	Small	TM1
0	44	H	1.87306	2.03907	1.95606	4	0.68549	0.350444	(+)	TM1
0	44	I	1.88907	1.91222	1.90065	11	1.0384	0.54634	Hydrophobic	TM1
0	44	K	1.43544	1.86005	1.64774	10	0.814175	0.494115	(+)	TM1
0	44	L	1.99804	2.62241	2.31023	9	2.10058	0.909254	Hydrophobic	TM1
0	44	M	1.22933	1.85007	1.5397	4	1.17067	0.760323	Hydrophobic	TM1
0	44	N	1.52443	3.29787	2.41115	9	1.22709	0.508924	Amide	TM1
0	44	P	2.4764	2.77346	2.62493	7	1.28443	0.489322	Proline	TM1
0	44	Q	1.66549	2.22891	1.9472	4	1.05217	0.540353	Amide	TM1
0	44	R	0.743359	0.961045	0.852202	4	0.397622	0.466582	(+)	TM1
0	44	S	4.87359	5.85953	5.36656	5	2.77931	0.517894	Nucleophilic	TM1
0	44	T	1.54513	2.10035	1.82274	6	1.35097	0.741176	Nucleophilic	TM1
0	44	W	1.4056	1.7331	1.56935	3	1.09622	0.698517	Aromatic	TM1
0	44	Y	1.54299	2.81626	2.17962	8	1.16467	0.534343	Aromatic	TM1
0	45	A	1.85085	2.043	1.94693	11	1.58259	0.812865	Small	TM1
0	45	C	0.780214	1.02335	0.901781	5	0.757312	0.839797	Nucleophilic	TM1
0	45	D	0.650213	0.740827	0.69552	5	0.558127	0.80246	(-)	TM1
0	45	E	1.02119	1.16916	1.09517	12	0.563744	0.514754	(-)	TM1
0	45	F	1.68554	2.3783	2.03192	6	1.00337	0.493804	Aromatic	TM1
0	45	G	1.25053	1.5498	1.40017	9	0.835846	0.596961	Small	TM1
0	45	H	0.938777	1.09143	1.01511	8	0.625247	0.615943	(+)	TM1
0	45	I	3.5685	4.23894	3.90372	10	3.93712	1.00856	Hydrophobic	TM1
0	45	K	1.47005	1.77007	1.62006	8	0.543452	0.335452	(+)	TM1
0	45	M	2.25957	2.46719	2.36338	8	1.12314	0.475224	Hydrophobic	TM1
0	45	N	1.34229	1.47983	1.41106	8	0.504829	0.357766	Amide	TM1
0	45	P	1.57811	1.938	1.75806	6	0.64695	0.367992	Proline	TM1
0	45	Q	1.80743	2.30424	2.05583	6	0.661622	0.321826	Amide	TM1
0	45	R	1.00801	1.02178	1.0149	7	0.317748	0.313085	(+)	TM1
0	45	S	1.83157	2.67989	2.25573	5	0.971179	0.430539	Nucleophilic	TM1
0	45	T	2.19948	2.81769	2.50858	6	1.48884	0.593498	Nucleophilic	TM1
0	45	V	2.03987	2.20364	2.12175	8	0.928158	0.437448	Hydrophobic	TM1
0	45	W	1.05789	1.14437	1.10113	6	0.737178	0.669472	Aromatic	TM1
0	45	Y	1.48664	1.64973	1.56818	9	0.564253	0.359813	Aromatic	TM1
0	46	C	1.76099	1.83342	1.79721	10	1.22402	0.681067	Nucleophilic	TM1
0	46	D	1.01548	1.03533	1.02541	10	0.539417	0.526052	(-)	TM1
0	46	E	1.16749	1.39227	1.27988	10	0.780354	0.609711	(-)	TM1
0	46	F	2.22166	3.20189	2.71178	10	1.62493	0.599213	Aromatic	TM1
0	46	G	1.63737	3.20681	2.42209	8	1.18073	0.487484	Small	TM1
0	46	H	1.37307	2.25742	1.81524	6	1.09859	0.605205	(+)	TM1
0	46	I	1.46773	2.00607	1.7369	6	1.02479	0.59001	Hydrophobic	TM1
0	46	K	1.38849	2.11618	1.75233	5	1.99928	1.14093	(+)	TM1
0	46	L	1.61053	2.45338	2.03196	9	1.28619	0.632982	Hydrophobic	TM1
0	46	M	0.9225	1.22165	1.07207	8	0.89675	0.836462	Hydrophobic	TM1
0	46	N	1.46952	1.58484	1.52718	5	0.813766	0.532854	Amide	TM1
0	46	P	1.28437	1.37021	1.32729	3	0.36143	0.272307	Proline	TM1
0	46	Q	2.1937	2.36253	2.27812	7	2.00767	0.881283	Amide	TM1
0	46	R	1.24043	1.74332	1.49188	7	0.407798	0.273346	(+)	TM1
0	46	S	0.826791	1.75859	1.29269	4	1.11708	0.864151	Nucleophilic	TM1
0	46	T	1.83365	2.19434	2.01399	13	1.1484	0.570211	Nucleophilic	TM1
0	46	V	1.1086	1.31007	1.20933	5	0.852947	0.705304	Hydrophobic	TM1
0	46	W	3.27467	6.73435	5.00451	4	4.49629	0.898448	Aromatic	TM1
0	46	Y	1.71324	2.09398	1.90361	6	1.2369	0.649762	Aromatic	TM1
0	47	A	1.48646	2.50734	1.9969	10	1.02007	0.510828	Small	TM1
0	47	C	1.26303	1.33858	1.30081	9	0.834613	0.641612	Nucleophilic	TM1
0	47	D	2.04488	3.30217	2.67352	7	1.33868	0.500715	(-)	TM1
0	47	E	1.17101	2.41015	1.79058	11	1.16686	0.651668	(-)	TM1
0	47	F	0.964815	1.11955	1.04218	11	0.471307	0.452231	Aromatic	TM1
0	47	G	1.73586	2.18818	1.96202	3	0.515421	0.262699	Small	TM1
0	47	H	0.612224	2.32328	1.46775	4	1.12795	0.768486	(+)	TM1
0	47	K	1.65218	1.87416	1.76317	4	0.620254	0.351783	(+)	TM1
0	47	L	2.06568	2.07097	2.06832	4	1.19443	0.577487	Hydrophobic	TM1
0	47	M	1.8161	2.25745	2.03677	6	0.613946	0.301431	Hydrophobic	TM1
0	47	N	2.13382	4.297	3.21541	1	NA	NA	Amide	TM1
0	47	P	1.01895	1.16324	1.0911	9	0.548473	0.50268	Proline	TM1
0	47	Q	2.48689	3.04283	2.76486	7	2.84246	1.02807	Amide	TM1
0	47	R	1.10032	1.11575	1.10804	7	0.526015	0.474728	(+)	TM1
0	47	S	1.30746	1.60188	1.45467	9	1.13411	0.779633	Nucleophilic	TM1
0	47	T	1.396	2.15504	1.77552	10	0.876875	0.493869	Nucleophilic	TM1
0	47	V	1.76679	2.06095	1.91387	9	1.29468	0.676472	Hydrophobic	TM1
0	47	W	0.817991	1.03793	0.927962	13	0.623581	0.67199	Aromatic	TM1
0	47	Y	1.14427	1.18215	1.16321	7	0.396895	0.341206	Aromatic	TM1
0	48	A	1.94795	2.46713	2.20754	11	0.816343	0.369797	Small	TM1
0	48	C	2.38355	2.48529	2.43442	10	1.25652	0.516149	Nucleophilic	TM1
0	48	D	1.01147	1.38786	1.19966	8	0.803255	0.669567	(-)	TM1
0	48	E	1.21369	1.31327	1.26348	10	0.613083	0.485233	(-)	TM1
0	48	F	1.07173	1.28376	1.17774	9	0.98148	0.833356	Aromatic	TM1
0	48	G	1.65736	2.24597	1.95167	8	1.29265	0.662332	Small	TM1
0	48	H	1.01985	1.24623	1.13304	10	0.596032	0.526047	(+)	TM1
0	48	I	3.04653	3.10301	3.07477	5	2.64684	0.860825	Hydrophobic	TM1
0	48	K	0.813392	0.881334	0.847363	4	0.427798	0.504859	(+)	TM1
0	48	L	1.41536	1.60585	1.51061	7	0.804736	0.532724	Hydrophobic	TM1
0	48	M	1.79217	2.10254	1.94736	5	1.03009	0.528968	Hydrophobic	TM1
0	48	N	1.44282	3.11807	2.28045	10	2.19715	0.963472	Amide	TM1
0	48	P	0.981197	1.18172	1.08146	8	0.559332	0.517201	Proline	TM1
0	48	Q	1.30128	1.48159	1.39143	6	0.696524	0.50058	Amide	TM1
0	48	R	0.595411	0.966966	0.781189	4	0.407028	0.521036	(+)	TM1
0	48	S	1.43403	1.59504	1.51454	11	0.749586	0.494927	Nucleophilic	TM1
0	48	T	3.41246	4.01709	3.71478	8	2.47292	0.665698	Nucleophilic	TM1
0	48	W	1.16233	1.21537	1.18885	11	0.589966	0.496249	Aromatic	TM1
0	48	Y	0.755981	1.27306	1.01452	9	0.648677	0.639392	Aromatic	TM1
0	49	A	1.47231	1.81918	1.64575	7	0.914785	0.555848	Small	TM1
0	49	C	1.8056	1.93383	1.86972	6	1.099	0.587787	Nucleophilic	TM1
0	49	D	1.0669	1.31272	1.18981	12	0.995624	0.836792	(-)	TM1
0	49	E	0.911122	1.21242	1.06177	10	0.85912	0.809137	(-)	TM1
0	49	G	1.55542	1.67416	1.61479	6	0.712982	0.441533	Small	TM1
0	49	H	2.39557	2.78632	2.59094	6	1.96316	0.757701	(+)	TM1
0	49	I	1.22525	1.85717	1.54121	4	0.840192	0.545151	Hydrophobic	TM1
0	49	K	1.73091	1.91364	1.82228	5	0.570152	0.312879	(+)	TM1
0	49	L	2.72502	3.13311	2.92907	6	1.15154	0.393142	Hydrophobic	TM1
0	49	M	1.47048	2.06468	1.76758	7	1.20078	0.679334	Hydrophobic	TM1
0	49	N	1.69476	1.74283	1.7188	8	1.23469	0.718345	Amide	TM1
0	49	P	2.13315	2.35347	2.24331	11	1.94771	0.868228	Proline	TM1
0	49	Q	2.08516	2.15906	2.12211	5	0.530851	0.250153	Amide	TM1
0	49	R	0.493517	1.17281	0.833163	3	0.346281	0.415623	(+)	TM1
0	49	S	2.03414	3.04312	2.53863	10	1.85159	0.729365	Nucleophilic	TM1
0	49	T	1.44644	1.96317	1.7048	9	1.07263	0.629182	Nucleophilic	TM1
0	49	V	1.30287	2.93592	2.1194	2	1.27487	0.601523	Hydrophobic	TM1
0	49	W	1.53676	2.71566	2.12621	10	1.79416	0.84383	Aromatic	TM1
0	49	Y	1.42383	2.064	1.74391	7	0.509604	0.292218	Aromatic	TM1
0	50	A	1.24172	1.64622	1.44397	13	1.07502	0.744488	Small	TM1
0	50	C	1.17795	1.3053	1.24162	12	0.818663	0.65935	Nucleophilic	TM1
0	50	D	1.76292	1.876	1.81946	9	0.608138	0.334241	(-)	TM1
0	50	E	2.80137	3.86526	3.33332	5	1.70639	0.511918	(-)	TM1
0	50	F	2.31586	2.48012	2.39799	10	1.52843	0.63738	Aromatic	TM1
0	50	H	0.939124	0.961189	0.950156	9	0.687868	0.723953	(+)	TM1
0	50	I	1.07627	1.2938	1.18504	8	0.668231	0.563891	Hydrophobic	TM1
0	50	K	1.19833	1.23728	1.2178	9	0.786313	0.645681	(+)	TM1
0	50	L	2.45597	2.78465	2.62031	5	0.938054	0.357994	Hydrophobic	TM1
0	50	M	2.16007	4.39366	3.27686	5	1.54478	0.471421	Hydrophobic	TM1
0	50	N	1.50781	4.17653	2.84217	8	3.57016	1.25614	Amide	TM1
0	50	P	2.24298	3.9725	3.10774	6	2.53824	0.816746	Proline	TM1
0	50	Q	1.95269	2.11837	2.03553	7	1.17911	0.579264	Amide	TM1
0	50	R	1.60285	1.63324	1.61805	7	0.613169	0.378956	(+)	TM1
0	50	S	1.83721	3.41779	2.6275	10	1.86696	0.710548	Nucleophilic	TM1
0	50	T	3.41687	3.60054	3.50871	3	0.648183	0.184735	Nucleophilic	TM1
0	50	V	1.2357	1.34885	1.29228	6	0.877044	0.678681	Hydrophobic	TM1
0	50	W	1.64512	1.76091	1.70301	11	0.885447	0.519929	Aromatic	TM1
0	50	Y	1.19403	1.47378	1.3339	7	0.741666	0.556012	Aromatic	TM1
0	51	A	1.60469	1.78194	1.69331	17	1.51086	0.89225	Small	TM1
0	51	C	1.32203	1.6233	1.47266	16	0.540106	0.366754	Nucleophilic	TM1
0	51	D	0.0220565	0.0405064	0.0312815	2	0.0204927	0.655108	(-)	TM1
0	51	E	0.873635	1.46982	1.17173	6	0.316922	0.270474	(-)	TM1
0	51	F	1.13153	1.21844	1.17499	13	0.59179	0.503657	Aromatic	TM1
0	51	G	0.784606	0.880826	0.832716	9	0.440812	0.529366	Small	TM1
0	51	H	1.53695	1.76015	1.64855	7	1.02474	0.621603	(+)	TM1
0	51	I	0.726631	1.18697	0.956802	12	0.62162	0.649685	Hydrophobic	TM1
0	51	K	1.23845	1.30669	1.27257	8	0.310902	0.24431	(+)	TM1
0	51	L	1.01933	1.19182	1.10557	14	0.662618	0.599344	Hydrophobic	TM1
0	51	M	0.966896	1.31606	1.14148	11	0.77261	0.676852	Hydrophobic	TM1
0	51	P	2.07416	2.17912	2.12664	14	2.36146	1.11042	Proline	TM1
0	51	Q	1.39788	1.52252	1.4602	9	0.630614	0.431868	Amide	TM1
0	51	R	0.773189	0.847653	0.810421	13	0.490365	0.605075	(+)	TM1
0	51	S	1.00227	1.21874	1.11051	8	0.77111	0.694377	Nucleophilic	TM1
0	51	T	1.61053	1.81186	1.7112	9	0.715633	0.418206	Nucleophilic	TM1
0	51	V	0.583922	0.667917	0.62592	8	0.579378	0.925643	Hydrophobic	TM1
0	51	W	1.31923	1.46825	1.39374	17	0.414193	0.297181	Aromatic	TM1
0	51	Y	1.07614	1.32215	1.19915	15	0.788935	0.657914	Aromatic	TM1
0	52	A	2.04991	3.20192	2.62591	9	1.31926	0.502402	Small	TM1
0	52	C	1.66251	3.07019	2.36635	8	1.98558	0.839091	Nucleophilic	TM1
0	52	D	1.08633	1.16932	1.12783	14	0.70904	0.628679	(-)	TM1
0	52	E	1.33713	1.53988	1.4385	5	0.389869	0.271024	(-)	TM1
0	52	F	0.330954	0.651046	0.491	8	0.584797	1.19103	Aromatic	TM1
0	52	G	2.11716	2.25356	2.18536	6	0.534175	0.244433	Small	TM1
0	52	H	0.662147	0.732041	0.697094	7	0.474691	0.680956	(+)	TM1
0	52	I	1.93811	2.51822	2.22817	8	1.01532	0.455674	Hydrophobic	TM1
0	52	K	1.29476	1.50861	1.40168	11	0.594206	0.423923	(+)	TM1
0	52	L	0.938	1.24778	1.09289	8	1.12374	1.02823	Hydrophobic	TM1
0	52	M	3.09841	3.9064	3.5024	7	1.57833	0.450642	Hydrophobic	TM1
0	52	N	1.39439	1.49053	1.44246	8	0.785868	0.544812	Amide	TM1
0	52	P	1.15093	1.28889	1.21991	5	0.354684	0.290746	Proline	TM1
0	52	Q	0.918628	1.5388	1.22871	8	0.580781	0.472674	Amide	TM1
0	52	R	1.32412	1.66676	1.49544	7	0.352441	0.235677	(+)	TM1
0	52	S	1.88374	2.52197	2.20285	8	0.993763	0.451126	Nucleophilic	TM1
0	52	T	2.40777	2.70356	2.55567	4	0.665847	0.260538	Nucleophilic	TM1
0	52	W	1.24221	2.47838	1.8603	13	1.18731	0.638238	Aromatic	TM1
0	52	Y	1.0495	1.4162	1.23285	4	1.32689	1.07628	Aromatic	TM1
0	53	A	1.50871	3.75795	2.63333	9	2.68743	1.02054	Small	TM1
0	53	C	1.75077	3.23566	2.49322	2	1.3275	0.532446	Nucleophilic	TM1
0	53	D	1.17053	1.34215	1.25634	9	0.429544	0.341902	(-)	TM1
0	53	E	0.837507	3.41429	2.1259	6	3.0036	1.41286	(-)	TM1
0	53	F	1.77086	2.08559	1.92823	9	1.08897	0.564753	Aromatic	TM1
0	53	G	1.93938	2.32934	2.13436	9	1.18578	0.555568	Small	TM1
0	53	H	0.802702	0.927007	0.864855	5	0.791201	0.914838	(+)	TM1
0	53	I	1.95311	2.07578	2.01445	7	0.372267	0.184799	Hydrophobic	TM1
0	53	K	1.33628	1.56394	1.45011	7	0.770106	0.531066	(+)	TM1
0	53	M	0.733671	0.940884	0.837278	4	0.597618	0.713763	Hydrophobic	TM1
0	53	N	1.61596	2.02483	1.8204	3	1.23434	0.678062	Amide	TM1
0	53	P	1.39733	1.7769	1.58712	7	0.683805	0.430847	Proline	TM1
0	53	Q	1.07031	1.1999	1.13511	8	0.680294	0.599322	Amide	TM1
0	53	R	1.0051	1.11561	1.06035	9	0.65568	0.618359	(+)	TM1
0	53	S	2.18046	2.30047	2.24046	5	0.817185	0.364739	Nucleophilic	TM1
0	53	T	2.18561	2.45651	2.32106	12	1.55947	0.671879	Nucleophilic	TM1
0	53	V	1.03468	1.89119	1.46294	6	0.927727	0.634153	Hydrophobic	TM1
0	53	W	2.67801	3.21447	2.94624	6	2.08668	0.708252	Aromatic	TM1
0	53	Y	1.4486	1.55963	1.50411	10	0.886303	0.589253	Aromatic	TM1
0	54	A	1.88683	2.48155	2.18419	11	1.04416	0.478053	Small	TM1
0	54	C	2.0227	2.04888	2.03579	6	0.818239	0.401927	Nucleophilic	TM1
0	54	D	0.647028	0.797629	0.722329	9	0.429103	0.594056	(-)	TM1
0	54	E	1.14746	1.33215	1.23981	10	0.579434	0.467358	(-)	TM1
0	54	F	0.961484	1.09805	1.02977	9	0.412218	0.400302	Aromatic	TM1
0	54	G	1.25088	2.31121	1.78104	13	2.14124	1.20224	Small	TM1
0	54	H	1.15745	1.26747	1.21246	6	0.442737	0.365157	(+)	TM1
0	54	I	1.69679	2.04659	1.87169	8	0.739569	0.395134	Hydrophobic	TM1
0	54	K	1.06893	1.39628	1.23261	18	0.636329	0.516246	(+)	TM1
0	54	L	1.14885	1.47539	1.31212	6	0.357922	0.27278	Hydrophobic	TM1
0	54	M	1.25009	1.5119	1.381	17	0.637192	0.461401	Hydrophobic	TM1
0	54	N	1.06391	1.32916	1.19653	10	0.651341	0.544357	Amide	TM1
0	54	P	1.37169	1.68783	1.52976	13	0.662142	0.43284	Proline	TM1
0	54	Q	0.685825	0.820242	0.753033	7	0.460374	0.611359	Amide	TM1
0	54	R	1.29195	1.31745	1.3047	20	0.835763	0.640579	(+)	TM1
0	54	S	1.42032	1.7405	1.58041	24	0.775377	0.490618	Nucleophilic	TM1
0	54	T	1.47397	1.54557	1.50977	15	0.66899	0.443108	Nucleophilic	TM1
0	54	W	1.17873	2.09648	1.6376	6	1.35519	0.827543	Aromatic	TM1
0	54	Y	0.768121	0.829812	0.798966	6	0.589045	0.737259	Aromatic	TM1
0	55	A	1.28757	1.29377	1.29067	7	0.752565	0.583083	Small	TM1
0	55	C	1.09749	1.37457	1.23603	4	0.266245	0.215404	Nucleophilic	TM1
0	55	D	1.35897	2.08733	1.72315	11	1.12056	0.650299	(-)	TM1
0	55	E	1.12426	1.29798	1.21112	10	0.306394	0.252984	(-)	TM1
0	55	F	1.09725	1.43065	1.26395	19	0.726776	0.575003	Aromatic	TM1
0	55	G	1.1522	1.26118	1.20669	9	0.45286	0.37529	Small	TM1
0	55	H	1.07575	1.15592	1.11584	14	0.375886	0.336864	(+)	TM1
0	55	K	0.995841	1.0105	1.00317	9	0.590845	0.588978	(+)	TM1
0	55	L	1.67669	1.84177	1.75923	9	0.852785	0.484749	Hydrophobic	TM1
0	55	M	2.44168	4.41565	3.42866	7	2.80078	0.816873	Hydrophobic	TM1
0	55	N	2.39492	2.45568	2.4253	17	2.74761	1.13289	Amide	TM1
0	55	P	1.10887	1.25515	1.18201	10	0.670943	0.567629	Proline	TM1
0	55	Q	0.945032	1.07326	1.00914	6	0.560178	0.555102	Amide	TM1
0	55	R	1.27401	1.49073	1.38237	9	0.652077	0.47171	(+)	TM1
0	55	S	1.62129	1.99299	1.80714	12	1.75632	0.971878	Nucleophilic	TM1
0	55	T	1.81546	3.52704	2.67125	12	3.94854	1.47816	Nucleophilic	TM1
0	55	V	1.53215	2.13148	1.83182	6	1.30089	0.710162	Hydrophobic	TM1
0	55	W	1.02159	1.19742	1.1095	9	0.541613	0.488158	Aromatic	TM1
0	55	Y	1.17469	1.45718	1.31593	5	0.138962	0.105599	Aromatic	TM1
0	56	A	1.41371	2.15042	1.78207	14	1.60226	0.899102	Small	TM1
0	56	C	1.82248	2.09614	1.95931	11	1.35225	0.690168	Nucleophilic	TM1
0	56	D	1.23974	1.57129	1.40552	17	0.870789	0.61955	(-)	TM1
0	56	E	1.04267	1.36868	1.20568	12	0.580948	0.481843	(-)	TM1
0	56	F	1.9312	2.31462	2.12291	14	1.42142	0.669564	Aromatic	TM1
0	56	G	1.14059	1.71981	1.4302	19	0.999476	0.698836	Small	TM1
0	56	H	1.26078	1.66446	1.46262	9	0.701813	0.479832	(+)	TM1
0	56	I	1.90751	2.54641	2.22696	16	1.43842	0.645912	Hydrophobic	TM1
0	56	K	2.48016	3.3438	2.91198	4	1.21752	0.418107	(+)	TM1
0	56	L	2.70361	3.98938	3.34649	4	0.826265	0.246905	Hydrophobic	TM1
0	56	M	1.51393	1.65501	1.58447	4	0.78673	0.496526	Hydrophobic	TM1
0	56	N	1.40174	1.4841	1.44292	12	0.774192	0.536544	Amide	TM1
0	56	P	1.02357	1.03028	1.02693	25	0.544937	0.530649	Proline	TM1
0	56	Q	0.91047	1.27753	1.094	7	0.483225	0.441705	Amide	TM1
0	56	R	1.77834	2.43917	2.10875	9	1.77823	0.84326	(+)	TM1
0	56	S	1.52489	2.57962	2.05225	13	1.2697	0.618685	Nucleophilic	TM1
0	56	V	1.648	1.67761	1.66281	18	0.717867	0.43172	Hydrophobic	TM1
0	56	W	2.12287	2.21944	2.17116	11	0.991779	0.456798	Aromatic	TM1
0	56	Y	1.86437	1.87309	1.86873	16	1.21626	0.650848	Aromatic	TM1
0	57	C	1.4229	1.62689	1.52489	19	0.785949	0.515413	Nucleophilic	TM1
0	57	D	0.768094	1.02633	0.897214	14	0.513456	0.572278	(-)	TM1
0	57	E	0.905145	1.30789	1.10652	12	0.518642	0.468715	(-)	TM1
0	57	F	0.977523	1.41587	1.1967	13	0.973664	0.813627	Aromatic	TM1
0	57	G	0.996282	1.32861	1.16245	9	0.709748	0.610564	Small	TM1
0	57	H	1.04503	1.33579	1.19041	13	0.563191	0.473106	(+)	TM1
0	57	I	1.08297	1.12607	1.10452	7	0.776175	0.702726	Hydrophobic	TM1
0	57	K	1.16077	1.46797	1.31437	15	0.492596	0.374777	(+)	TM1
0	57	L	1.51729	1.89058	1.70394	22	0.720148	0.422638	Hydrophobic	TM1
0	57	M	1.91018	2.00135	1.95576	11	0.617588	0.315779	Hydrophobic	TM1
0	57	N	1.12445	1.44267	1.28356	13	1.00495	0.782941	Amide	TM1
0	57	P	0.68232	1.04046	0.86139	13	0.547913	0.63608	Proline	TM1
0	57	Q	1.58953	1.84614	1.71783	11	0.723694	0.421283	Amide	TM1
0	57	R	1.3879	1.50708	1.44749	12	0.539317	0.372587	(+)	TM1
0	57	S	2.05862	2.33548	2.19705	14	1.116	0.507952	Nucleophilic	TM1
0	57	T	1.71374	2.25223	1.98299	14	0.798234	0.402541	Nucleophilic	TM1
0	57	V	2.86807	3.44295	3.15551	13	3.49801	1.10854	Hydrophobic	TM1
0	57	W	1.4481	1.67645	1.56228	12	0.685649	0.438878	Aromatic	TM1
0	57	Y	0.820638	0.954373	0.887506	10	0.444241	0.50055	Aromatic	TM1
0	58	A	1.10112	1.1067	1.10391	16	0.495505	0.448862	Small	TM1
0	58	C	1.63736	1.77675	1.70705	11	0.718272	0.420767	Nucleophilic	TM1
0	58	D	1.43158	1.58544	1.50851	12	0.534698	0.354454	(-)	TM1
0	58	E	1.23279	1.51004	1.37141	14	0.625234	0.455904	(-)	TM1
0	58	F	2.22074	2.26261	2.24167	11	1.81456	0.809466	Aromatic	TM1
0	58	G	1.7506	1.84781	1.79921	16	1.15987	0.644655	Small	TM1
0	58	H	2.19446	2.39691	2.29568	12	1.35297	0.589352	(+)	TM1
0	58	K	0.822509	0.864597	0.843553	11	0.503059	0.596357	(+)	TM1
0	58	L	0.985516	1.26531	1.12541	4	0.511257	0.454284	Hydrophobic	TM1
0	58	M	1.46319	2.27643	1.86981	10	1.00449	0.537215	Hydrophobic	TM1
0	58	N	1.43622	2.04284	1.73953	11	1.24607	0.716325	Amide	TM1
0	58	P	1.13144	1.24962	1.19053	16	0.446618	0.375141	Proline	TM1
0	58	Q	0.86269	1.2104	1.03654	17	0.928549	0.895812	Amide	TM1
0	58	R	1.00746	1.02619	1.01682	19	0.432466	0.42531	(+)	TM1
0	58	S	1.28584	2.17393	1.72988	8	0.860321	0.497329	Nucleophilic	TM1
0	58	T	2.25587	2.42058	2.33822	16	2.11916	0.90631	Nucleophilic	TM1
0	58	V	2.09828	2.16823	2.13325	8	1.10324	0.517165	Hydrophobic	TM1
0	58	W	1.58692	2.11947	1.8532	6	1.03952	0.560932	Aromatic	TM1
0	58	Y	2.80997	3.24377	3.02687	8	1.19024	0.393224	Aromatic	TM1
0	59	C	1.77921	3.30965	2.54443	7	1.85715	0.729888	Nucleophilic	TM1
0	59	D	0.926209	0.977911	0.95206	11	0.525953	0.552436	(-)	TM1
0	59	E	1.10675	2.28421	1.69548	11	1.45608	0.858802	(-)	TM1
0	59	F	2.57	2.79203	2.68101	10	1.60991	0.600485	Aromatic	TM1
0	59	G	1.11366	1.30328	1.20847	14	0.615711	0.509495	Small	TM1
0	59	H	1.82916	2.76142	2.29529	11	1.09841	0.478548	(+)	TM1
0	59	I	1.86696	1.94497	1.90597	12	1.21562	0.637798	Hydrophobic	TM1
0	59	K	2.46024	2.85438	2.65731	8	1.96174	0.738244	(+)	TM1
0	59	L	2.31688	2.84119	2.57904	10	2.43735	0.945064	Hydrophobic	TM1
0	59	M	1.90189	2.20981	2.05585	9	1.15325	0.560961	Hydrophobic	TM1
0	59	N	1.7342	2.35286	2.04353	15	2.01473	0.985908	Amide	TM1
0	59	P	1.23074	1.59347	1.41211	8	0.586658	0.415449	Proline	TM1
0	59	Q	1.10272	1.18122	1.14197	6	0.723992	0.633984	Amide	TM1
0	59	R	1.93581	2.03455	1.98518	4	1.26438	0.636911	(+)	TM1
0	59	S	1.44256	1.65514	1.54885	10	0.708038	0.457137	Nucleophilic	TM1
0	59	T	2.10511	2.35292	2.22902	15	1.52507	0.684189	Nucleophilic	TM1
0	59	V	2.43523	3.87677	3.156	4	1.23164	0.390252	Hydrophobic	TM1
0	59	W	1.89418	2.6713	2.28274	13	2.14598	0.940089	Aromatic	TM1
0	59	Y	2.28424	2.89249	2.58837	10	0.916671	0.35415	Aromatic	TM1
0	60	A	1.27716	1.41217	1.34467	16	0.559265	0.415914	Small	TM1
0	60	C	1.49725	1.74146	1.61936	10	0.453396	0.279986	Nucleophilic	TM1
0	60	D	1.38445	1.72156	1.55301	6	0.870806	0.560723	(-)	TM1
0	60	E	0.88723	0.93108	0.909155	12	0.637393	0.701083	(-)	TM1
0	60	F	1.47137	2.05251	1.76194	13	1.00118	0.568228	Aromatic	TM1
0	60	G	0.81023	0.84488	0.827555	10	0.53428	0.645613	Small	TM1
0	60	H	1.16677	1.52936	1.34806	12	0.470335	0.348897	(+)	TM1
0	60	I	0.876527	1.0633	0.969912	8	0.589746	0.608041	Hydrophobic	TM1
0	60	L	1.50213	1.84064	1.67138	14	0.698089	0.417672	Hydrophobic	TM1
0	60	M	1.53191	1.61532	1.57361	10	0.345228	0.219386	Hydrophobic	TM1
0	60	N	1.61352	1.77698	1.69525	16	1.06644	0.629076	Amide	TM1
0	60	P	1.38057	1.45713	1.41885	5	0.597431	0.421066	Proline	TM1
0	60	Q	1.27421	1.34879	1.3115	15	0.651777	0.496972	Amide	TM1
0	60	R	1.91429	2.19199	2.05314	18	1.51154	0.73621	(+)	TM1
0	60	S	1.4838	1.72054	1.60217	17	0.615095	0.383913	Nucleophilic	TM1
0	60	T	1.11658	2.16723	1.64191	9	1.20522	0.734038	Nucleophilic	TM1
0	60	V	1.43665	1.85653	1.64659	11	0.479674	0.291314	Hydrophobic	TM1
0	60	W	1.58377	1.59122	1.58749	17	0.688013	0.433396	Aromatic	TM1
0	60	Y	1.39649	1.49956	1.44803	10	0.785371	0.542373	Aromatic	TM1
0	61	A	1.6938	1.7183	1.70605	15	0.639721	0.374972	Small	TM1
0	61	C	2.01647	3.04188	2.52918	7	1.76493	0.697829	Nucleophilic	TM1
0	61	D	1.51063	1.72873	1.61968	14	0.919046	0.567426	(-)	TM1
0	61	E	0.817178	0.930307	0.873743	7	0.73307	0.839	(-)	TM1
0	61	G	1.23192	1.72978	1.48085	9	0.702536	0.474413	Small	TM1
0	61	H	1.27059	2.17322	1.72191	6	1.8796	1.09158	(+)	TM1
0	61	I	1.56061	1.86357	1.71209	8	0.609092	0.35576	Hydrophobic	TM1
0	61	K	0.934589	2.78419	1.85939	10	2.22612	1.19723	(+)	TM1
0	61	L	1.21873	1.88444	1.55158	15	0.848985	0.547174	Hydrophobic	TM1
0	61	M	1.69104	1.92381	1.80743	8	1.76201	0.974873	Hydrophobic	TM1
0	61	N	1.8832	2.4565	2.16985	4	1.04391	0.481098	Amide	TM1
0	61	P	1.06226	1.24871	1.15549	11	0.554129	0.479563	Proline	TM1
0	61	Q	2.01077	4.55463	3.2827	8	3.82307	1.16461	Amide	TM1
0	61	R	2.12742	3.21995	2.67368	10	3.52425	1.31813	(+)	TM1
0	61	S	2.33749	2.38635	2.36192	10	0.923345	0.39093	Nucleophilic	TM1
0	61	T	1.32937	2.3959	1.86263	7	0.910855	0.489015	Nucleophilic	TM1
0	61	V	1.43187	1.98233	1.7071	6	1.4386	0.842715	Hydrophobic	TM1
0	61	W	1.07504	1.37228	1.22366	12	0.680152	0.555834	Aromatic	TM1
0	61	Y	2.02305	2.17915	2.1011	11	1.28326	0.610755	Aromatic	TM1
0	62	A	1.65726	1.94836	1.80281	16	0.745056	0.413274	Small	IC1
0	62	C	1.40206	1.42885	1.41546	16	0.701378	0.495514	Nucleophilic	IC1
0	62	D	0.663235	0.742725	0.70298	7	0.538869	0.76655	(-)	IC1
0	62	F	1.21586	1.23165	1.22375	12	0.651202	0.532136	Aromatic	IC1
0	62	G	2.17695	3.22277	2.69986	12	1.26911	0.470064	Small	IC1
0	62	H	2.96251	3.12843	3.04547	14	1.87493	0.615646	(+)	IC1
0	62	I	1.26237	1.45714	1.35976	12	0.611409	0.449646	Hydrophobic	IC1
0	62	K	2.76484	3.7098	3.23732	8	3.08799	0.953873	(+)	IC1
0	62	L	1.03394	1.16133	1.09763	19	0.640838	0.583836	Hydrophobic	IC1
0	62	M	1.49001	1.76055	1.62528	19	0.985584	0.60641	Hydrophobic	IC1
0	62	N	1.65466	2.27043	1.96255	17	1.25736	0.640678	Amide	IC1
0	62	P	2.50404	6.24846	4.37625	8	3.2471	0.741984	Proline	IC1
0	62	Q	3.09667	4.28044	3.68855	10	2.9596	0.802375	Amide	IC1
0	62	R	7.07499	7.55486	7.31492	5	3.99758	0.546497	(+)	IC1
0	62	S	1.91285	2.58152	2.24718	9	1.37795	0.613188	Nucleophilic	IC1
0	62	T	1.34816	3.57072	2.45944	7	2.21263	0.899648	Nucleophilic	IC1
0	62	V	1.3121	1.71133	1.51172	13	1.16238	0.768916	Hydrophobic	IC1
0	62	W	1.49799	1.97633	1.73716	15	1.08886	0.626807	Aromatic	IC1
0	62	Y	1.39432	1.44892	1.42162	11	0.746555	0.525144	Aromatic	IC1
0	63	A	1.04124	1.14713	1.09419	15	0.724871	0.662474	Small	IC1
0	63	C	1.27229	1.56437	1.41833	18	0.549505	0.387431	Nucleophilic	IC1
0	63	D	1.39959	1.46783	1.43371	7	0.543974	0.379417	(-)	IC1
0	63	E	0.978938	1.49477	1.23685	14	1.09052	0.881691	(-)	IC1
0	63	F	1.24465	1.26724	1.25594	8	0.760703	0.605683	Aromatic	IC1
0	63	G	1.16952	1.48154	1.32553	11	0.623162	0.470123	Small	IC1
0	63	H	1.30692	1.99	1.64846	9	0.710309	0.430892	(+)	IC1
0	63	I	1.25369	1.28135	1.26752	11	0.604366	0.476808	Hydrophobic	IC1
0	63	K	1.78484	2.00147	1.89315	5	0.910493	0.48094	(+)	IC1
0	63	L	1.22217	1.36014	1.29116	12	0.444609	0.344349	Hydrophobic	IC1
0	63	M	1.20043	1.225	1.21272	14	0.593826	0.489665	Hydrophobic	IC1
0	63	N	1.2995	1.55904	1.42927	10	0.744718	0.521049	Amide	IC1
0	63	P	1.43585	1.69511	1.56548	10	0.514001	0.328334	Proline	IC1
0	63	Q	1.21896	1.60512	1.41204	25	1.04592	0.740714	Amide	IC1
0	63	S	1.07398	1.38546	1.22972	18	0.634569	0.516027	Nucleophilic	IC1
0	63	T	1.58251	1.67125	1.62688	12	0.734949	0.451754	Nucleophilic	IC1
0	63	V	1.11594	1.36568	1.24081	22	0.609523	0.49123	Hydrophobic	IC1
0	63	W	1.32657	1.33158	1.32907	11	0.455269	0.342546	Aromatic	IC1
0	63	Y	0.969992	1.03076	1.00038	15	0.481105	0.480925	Aromatic	IC1
0	64	A	0.939816	1.08236	1.01109	11	0.474839	0.469632	Small	IC1
0	64	C	1.34089	1.47333	1.40711	7	0.375953	0.26718	Nucleophilic	IC1
0	64	D	1.16923	1.28241	1.22582	18	0.550159	0.448809	(-)	IC1
0	64	E	1.42129	1.57315	1.49722	7	0.509077	0.340014	(-)	IC1
0	64	F	1.2222	1.41421	1.3182	11	0.793744	0.602141	Aromatic	IC1
0	64	G	1.09091	1.41388	1.2524	15	0.620677	0.495592	Small	IC1
0	64	H	0.850213	1.03257	0.94139	10	0.476487	0.506153	(+)	IC1
0	64	I	1.23774	1.52444	1.38109	18	0.783582	0.567364	Hydrophobic	IC1
0	64	K	1.35292	1.5622	1.45756	15	0.867013	0.594839	(+)	IC1
0	64	M	0.978865	1.29795	1.13841	9	0.570755	0.501363	Hydrophobic	IC1
0	64	N	1.45605	1.50326	1.47965	12	0.507969	0.343302	Amide	IC1
0	64	P	1.34596	1.65559	1.50077	14	0.807698	0.538188	Proline	IC1
0	64	Q	1.2842	1.67165	1.47793	14	0.99718	0.674714	Amide	IC1
0	64	R	1.48438	1.52291	1.50365	8	0.878062	0.583955	(+)	IC1
0	64	S	1.04907	1.40432	1.2267	8	0.428322	0.349167	Nucleophilic	IC1
0	64	T	1.11517	1.16608	1.14063	15	0.489553	0.429196	Nucleophilic	IC1
0	64	V	1.60755	1.60946	1.6085	18	1.01555	0.631366	Hydrophobic	IC1
0	64	W	1.06328	1.25773	1.16051	12	0.367379	0.316568	Aromatic	IC1
0	64	Y	1.08294	1.2681	1.17552	14	0.658247	0.559963	Aromatic	IC1
0	65	A	1.59931	2.07057	1.83494	13	1.17418	0.6399	Small	IC1
0	65	C	1.30422	1.77438	1.5393	15	0.942094	0.612027	Nucleophilic	IC1
0	65	D	0.74696	1.69711	1.22203	11	1.11498	0.912396	(-)	IC1
0	65	E	1.32426	1.32572	1.32499	14	0.625794	0.472301	(-)	IC1
0	65	F	1.46915	1.55696	1.51306	13	0.534399	0.353192	Aromatic	IC1
0	65	G	1.31896	1.33569	1.32733	17	0.654245	0.492905	Small	IC1
0	65	H	2.07463	2.23305	2.15384	13	0.77048	0.357724	(+)	IC1
0	65	I	1.05442	1.16334	1.10888	14	0.646574	0.583088	Hydrophobic	IC1
0	65	K	2.49746	2.51839	2.50793	9	1.45586	0.580504	(+)	IC1
0	65	L	1.2669	1.28263	1.27476	7	0.762353	0.598034	Hydrophobic	IC1
0	65	M	1.58174	1.63253	1.60714	13	0.478891	0.297978	Hydrophobic	IC1
0	65	N	1.38607	1.5729	1.47949	21	0.815273	0.551052	Amide	IC1
0	65	P	1.09683	1.28424	1.19053	16	0.416995	0.350259	Proline	IC1
0	65	R	2.56058	2.66118	2.61088	10	2.20528	0.844649	(+)	IC1
0	65	S	1.97246	2.63524	2.30385	10	2.25854	0.980333	Nucleophilic	IC1
0	65	T	1.62591	2.39758	2.01174	9	1.12412	0.558781	Nucleophilic	IC1
0	65	V	1.04047	1.12471	1.08259	16	0.506842	0.468174	Hydrophobic	IC1
0	65	W	1.25681	1.40558	1.3312	14	0.512957	0.385335	Aromatic	IC1
0	65	Y	1.20638	1.27021	1.23829	14	0.522532	0.421978	Aromatic	IC1
0	66	A	1.27002	1.42694	1.34848	14	0.748872	0.555345	Small	TM2
0	66	C	1.35277	1.48906	1.42091	11	0.634789	0.446746	Nucleophilic	TM2
0	66	D	1.25234	1.30645	1.2794	11	0.483198	0.377676	(-)	TM2
0	66	E	1.12539	1.37746	1.25142	14	0.478387	0.382274	(-)	TM2
0	66	F	1.22682	1.46902	1.34792	12	0.533655	0.395911	Aromatic	TM2
0	66	G	1.35101	1.43382	1.39241	7	0.724233	0.520127	Small	TM2
0	66	H	1.42065	1.52016	1.47041	10	0.486874	0.331115	(+)	TM2
0	66	I	1.63791	1.83254	1.73522	20	0.846417	0.487786	Hydrophobic	TM2
0	66	K	2.0177	2.36805	2.19288	8	1.17691	0.536696	(+)	TM2
0	66	L	1.25409	1.26661	1.26035	10	0.641	0.508589	Hydrophobic	TM2
0	66	M	0.798613	1.07771	0.938163	9	0.784154	0.83584	Hydrophobic	TM2
0	66	N	1.48552	2.09503	1.79027	9	1.0665	0.595717	Amide	TM2
0	66	P	1.10014	1.1806	1.14037	7	0.614449	0.538816	Proline	TM2
0	66	Q	2.00713	2.62654	2.31684	9	1.48012	0.638856	Amide	TM2
0	66	R	1.1979	1.52349	1.3607	9	0.835267	0.613853	(+)	TM2
0	66	S	1.90062	1.90248	1.90155	7	0.974539	0.512497	Nucleophilic	TM2
0	66	V	1.20572	1.22519	1.21545	8	0.446492	0.367346	Hydrophobic	TM2
0	66	W	1.15281	1.35944	1.25613	9	0.569026	0.453001	Aromatic	TM2
0	66	Y	1.3793	1.54674	1.46302	7	0.903235	0.617376	Aromatic	TM2
0	67	A	1.44385	1.78309	1.61347	10	1.06924	0.662696	Small	TM2
0	67	C	0.949899	1.1887	1.0693	9	0.706392	0.660612	Nucleophilic	TM2
0	67	D	1.22917	1.73141	1.48029	12	0.952705	0.643593	(-)	TM2
0	67	E	1.8261	2.33628	2.08119	10	0.936738	0.450097	(-)	TM2
0	67	F	1.47632	1.56889	1.5226	12	0.764971	0.502411	Aromatic	TM2
0	67	G	2.19352	2.19812	2.19582	13	1.18988	0.541883	Small	TM2
0	67	H	1.79002	2.28529	2.03765	10	1.04227	0.511504	(+)	TM2
0	67	I	1.75416	1.99829	1.87622	11	1.38703	0.739266	Hydrophobic	TM2
0	67	K	2.30855	2.58306	2.44581	6	1.40708	0.575304	(+)	TM2
0	67	L	1.8921	2.58502	2.23856	10	1.43186	0.639632	Hydrophobic	TM2
0	67	M	1.45025	1.67064	1.56045	9	1.17463	0.752752	Hydrophobic	TM2
0	67	N	1.49599	1.86263	1.67931	18	1.11632	0.664751	Amide	TM2
0	67	P	2.05858	2.64293	2.35076	6	2.19986	0.935809	Proline	TM2
0	67	Q	2.34362	2.89649	2.62005	9	1.07772	0.411334	Amide	TM2
0	67	R	1.83438	2.34094	2.08766	15	2.10897	1.01021	(+)	TM2
0	67	S	2.42986	2.80021	2.61503	11	1.72869	0.661058	Nucleophilic	TM2
0	67	T	2.13344	2.21305	2.17324	10	1.17898	0.542499	Nucleophilic	TM2
0	67	W	1.02682	1.35813	1.19247	8	0.619245	0.519294	Aromatic	TM2
0	67	Y	1.37931	1.38497	1.38214	12	0.995197	0.72004	Aromatic	TM2
0	68	A	2.18904	2.22537	2.2072	17	1.02706	0.465319	Small	TM2
0	68	C	1.46078	1.71221	1.58649	11	0.571996	0.360541	Nucleophilic	TM2
0	68	D	1.51767	2.66211	2.08989	7	1.10993	0.531094	(-)	TM2
0	68	E	0.909415	1.10673	1.00807	8	0.670276	0.664909	(-)	TM2
0	68	F	0.953968	1.16362	1.05879	12	0.480883	0.45418	Aromatic	TM2
0	68	G	3.0478	3.3498	3.1988	11	1.90113	0.594325	Small	TM2
0	68	H	0.924488	1.41629	1.17039	10	1.30445	1.11454	(+)	TM2
0	68	I	0.960537	0.96863	0.964583	13	0.437092	0.453141	Hydrophobic	TM2
0	68	K	1.40114	1.8696	1.63537	11	1.15923	0.708851	(+)	TM2
0	68	L	1.13778	1.51994	1.32886	15	0.664289	0.499894	Hydrophobic	TM2
0	68	M	1.29789	1.35831	1.3281	11	0.55139	0.415171	Hydrophobic	TM2
0	68	N	1.77815	3.01784	2.398	11	1.19724	0.499267	Amide	TM2
0	68	P	1.82948	2.1479	1.98869	10	1.20808	0.607474	Proline	TM2
0	68	Q	1.50727	2.00321	1.75524	12	1.47877	0.84249	Amide	TM2
0	68	R	2.87735	3.77149	3.32442	14	2.28962	0.688726	(+)	TM2
0	68	S	2.63962	2.70204	2.67083	16	1.75854	0.658426	Nucleophilic	TM2
0	68	V	1.30406	1.3459	1.32498	18	0.412463	0.311297	Hydrophobic	TM2
0	68	W	1.512	1.62278	1.56739	11	0.51447	0.328233	Aromatic	TM2
0	68	Y	1.0621	1.33785	1.19997	15	0.57504	0.47921	Aromatic	TM2
0	69	A	2.00872	2.4731	2.24091	15	1.33217	0.594477	Small	TM2
0	69	C	1.45864	1.91807	1.68835	15	0.616142	0.364937	Nucleophilic	TM2
0	69	D	1.13738	1.26263	1.2	10	0.641313	0.534425	(-)	TM2
0	69	E	1.18141	1.28193	1.23167	22	0.512677	0.416246	(-)	TM2
0	69	F	1.03143	1.46041	1.24592	12	1.0138	0.813695	Aromatic	TM2
0	69	G	1.61648	1.99335	1.80492	9	0.972374	0.538736	Small	TM2
0	69	H	1.12087	1.61362	1.36725	11	0.865213	0.632814	(+)	TM2
0	69	I	0.8981	1.01735	0.957724	8	0.572042	0.597293	Hydrophobic	TM2
0	69	K	1.03985	1.44842	1.24413	13	0.703626	0.565556	(+)	TM2
0	69	L	1.34917	1.47569	1.41243	16	0.736593	0.521507	Hydrophobic	TM2
0	69	M	1.47639	2.28648	1.88144	9	1.0216	0.542988	Hydrophobic	TM2
0	69	P	1.23335	1.37638	1.30487	17	0.780853	0.598416	Proline	TM2
0	69	Q	0.940531	1.14627	1.0434	13	0.724937	0.694782	Amide	TM2
0	69	R	0.969884	1.20248	1.08618	16	0.759514	0.69925	(+)	TM2
0	69	S	2.21637	2.27717	2.24677	14	1.02904	0.45801	Nucleophilic	TM2
0	69	T	1.2241	1.49377	1.35893	15	0.608469	0.447755	Nucleophilic	TM2
0	69	V	1.34966	1.58836	1.46901	24	1.00554	0.684504	Hydrophobic	TM2
0	69	W	1.10207	1.28093	1.1915	23	0.470635	0.394995	Aromatic	TM2
0	69	Y	0.90529	0.931084	0.918187	8	0.475413	0.517773	Aromatic	TM2
0	70	A	1.58114	3.66463	2.62289	7	2.48183	0.946221	Small	TM2
0	70	C	1.665	1.73058	1.69779	16	1.1421	0.672698	Nucleophilic	TM2
0	70	D	1.5037	1.92092	1.71231	16	1.53868	0.898598	(-)	TM2
0	70	E	1.37527	1.54984	1.46256	10	0.780948	0.533961	(-)	TM2
0	70	F	1.28502	1.83244	1.55873	9	0.757487	0.485965	Aromatic	TM2
0	70	G	1.24013	1.24426	1.24219	8	0.867849	0.698642	Small	TM2
0	70	H	1.65294	2.0441	1.84852	13	0.609753	0.329861	(+)	TM2
0	70	I	1.80679	2.09847	1.95263	11	1.71239	0.876962	Hydrophobic	TM2
0	70	K	1.50078	2.37314	1.93696	13	1.22882	0.634409	(+)	TM2
0	70	L	1.66929	1.9039	1.7866	8	0.728836	0.407947	Hydrophobic	TM2
0	70	M	1.44907	1.49248	1.47078	10	0.897598	0.610289	Hydrophobic	TM2
0	70	N	0.99296	1.91827	1.45562	7	1.30343	0.89545	Amide	TM2
0	70	P	1.08955	1.482	1.28577	10	0.6774	0.526843	Proline	TM2
0	70	Q	1.55753	1.91951	1.73852	10	0.929383	0.534584	Amide	TM2
0	70	R	1.58553	2.00006	1.79279	12	1.44922	0.80836	(+)	TM2
0	70	S	1.05781	1.38471	1.22126	11	0.988437	0.80936	Nucleophilic	TM2
0	70	T	1.51275	1.77766	1.6452	6	1.14598	0.696557	Nucleophilic	TM2
0	70	V	1.54905	1.79747	1.67326	8	1.36271	0.814402	Hydrophobic	TM2
0	70	W	1.35977	1.83243	1.5961	22	0.891184	0.558351	Aromatic	TM2
0	71	A	1.1179	1.34739	1.23265	14	0.617578	0.501019	Small	TM2
0	71	C	0.979249	1.11858	1.04892	14	1.00495	0.95808	Nucleophilic	TM2
0	71	D	1.15431	1.24324	1.19877	14	0.335694	0.280031	(-)	TM2
0	71	E	1.34296	1.42671	1.38484	10	0.298225	0.21535	(-)	TM2
0	71	G	1.09959	1.13644	1.11802	16	0.698432	0.624706	Small	TM2
0	71	H	1.241	1.38742	1.31421	7	0.567152	0.431554	(+)	TM2
0	71	I	1.21107	1.83138	1.52122	11	0.631935	0.415412	Hydrophobic	TM2
0	71	K	1.04489	1.14492	1.0949	16	0.321806	0.293912	(+)	TM2
0	71	L	1.38004	1.86909	1.62457	9	0.559008	0.344097	Hydrophobic	TM2
0	71	M	1.07334	1.17371	1.12352	17	0.568424	0.505931	Hydrophobic	TM2
0	71	N	1.1484	1.26518	1.20679	12	0.46993	0.389405	Amide	TM2
0	71	P	1.27133	1.44522	1.35828	14	0.874368	0.643734	Proline	TM2
0	71	Q	1.46111	1.52306	1.49209	17	0.299823	0.200942	Amide	TM2
0	71	R	1.34405	1.34577	1.34491	18	0.475742	0.353735	(+)	TM2
0	71	S	1.14047	1.62225	1.38136	15	0.691846	0.500844	Nucleophilic	TM2
0	71	T	1.67452	2.16266	1.91859	8	1.44652	0.753951	Nucleophilic	TM2
0	71	V	1.1606	1.19171	1.17616	11	0.669287	0.569045	Hydrophobic	TM2
0	71	W	1.38529	3.2309	2.30809	12	3.23419	1.40124	Aromatic	TM2
0	71	Y	1.28601	1.55766	1.42184	11	0.778685	0.547661	Aromatic	TM2
0	72	A	1.48745	1.74842	1.61794	11	0.720737	0.445466	Small	TM2
0	72	C	1.07018	2.05325	1.56172	10	1.02039	0.653376	Nucleophilic	TM2
0	72	D	1.11069	1.33681	1.22375	16	0.868866	0.710002	(-)	TM2
0	72	E	1.28294	1.41609	1.34951	15	0.689216	0.510715	(-)	TM2
0	72	F	1.28996	1.30195	1.29596	16	0.82432	0.636071	Aromatic	TM2
0	72	G	0.83222	1.12952	0.98087	16	0.643792	0.656348	Small	TM2
0	72	H	1.27123	1.32336	1.29729	14	0.732163	0.564377	(+)	TM2
0	72	K	1.32507	1.87524	1.60016	10	0.958662	0.599104	(+)	TM2
0	72	L	1.1348	1.87666	1.50573	16	0.783676	0.520463	Hydrophobic	TM2
0	72	M	1.17226	1.34808	1.26017	8	0.366353	0.290717	Hydrophobic	TM2
0	72	N	1.25468	1.35314	1.30391	11	0.672765	0.51596	Amide	TM2
0	72	P	1.27864	1.37166	1.32515	10	0.686488	0.518044	Proline	TM2
0	72	Q	1.23786	1.63214	1.435	14	0.706777	0.492528	Amide	TM2
0	72	R	2.12616	2.31903	2.22259	10	1.36166	0.612646	(+)	TM2
0	72	S	1.47737	1.56415	1.52076	12	0.425857	0.280029	Nucleophilic	TM2
0	72	T	1.25442	1.69915	1.47679	9	1.1504	0.778985	Nucleophilic	TM2
0	72	V	1.59888	1.6516	1.62524	14	1.08755	0.669166	Hydrophobic	TM2
0	72	W	0.78168	1.08835	0.935014	11	0.529133	0.565909	Aromatic	TM2
0	72	Y	1.1699	1.38821	1.27906	10	0.7045	0.550796	Aromatic	TM2
0	73	A	1.97545	3.24049	2.60797	7	2.57619	0.987814	Small	TM2
0	73	C	1.43518	1.53953	1.48735	8	1.01269	0.68087	Nucleophilic	TM2
0	73	D	1.07552	1.1364	1.10596	12	0.562338	0.508461	(-)	TM2
0	73	E	0.985074	1.16291	1.07399	15	0.62665	0.583477	(-)	TM2
0	73	F	1.96489	2.78244	2.37366	13	1.64476	0.69292	Aromatic	TM2
0	73	G	2.54406	2.80813	2.67609	9	1.5404	0.575617	Small	TM2
0	73	H	1.77552	2.14414	1.95983	18	0.89722	0.457806	(+)	TM2
0	73	I	1.48897	2.30889	1.89893	11	1.57329	0.828515	Hydrophobic	TM2
0	73	K	1.49849	1.55839	1.52844	13	0.775346	0.507278	(+)	TM2
0	73	L	1.12341	1.63484	1.37912	11	1.39978	1.01498	Hydrophobic	TM2
0	73	M	2.2653	3.19089	2.7281	6	1.57946	0.57896	Hydrophobic	TM2
0	73	N	0.936232	1.03688	0.986555	13	0.488772	0.495433	Amide	TM2
0	73	P	0.466259	0.57467	0.520465	5	0.418081	0.803285	Proline	TM2
0	73	Q	1.74107	2.17448	1.95778	12	1.09349	0.558538	Amide	TM2
0	73	R	1.93807	2.02252	1.9803	13	1.0359	0.523106	(+)	TM2
0	73	S	1.31627	1.6662	1.49124	15	0.743055	0.498282	Nucleophilic	TM2
0	73	V	1.87982	2.59961	2.23971	12	0.92022	0.410865	Hydrophobic	TM2
0	73	W	1.99803	2.92909	2.46356	7	1.27713	0.518407	Aromatic	TM2
0	73	Y	1.90664	2.34724	2.12694	14	1.31726	0.619323	Aromatic	TM2
0	74	A	1.7673	1.81608	1.79169	7	0.847989	0.473289	Small	TM2
0	74	C	2.41398	2.99472	2.70435	9	1.55997	0.576836	Nucleophilic	TM2
0	74	D	1.37956	1.67026	1.52491	11	0.577817	0.378919	(-)	TM2
0	74	E	0.982855	1.00606	0.994459	21	0.634178	0.637712	(-)	TM2
0	74	F	1.09691	1.17314	1.13503	11	0.628366	0.553614	Aromatic	TM2
0	74	G	1.33667	1.40814	1.3724	13	0.753848	0.54929	Small	TM2
0	74	H	1.21173	1.39446	1.30309	8	0.638461	0.489958	(+)	TM2
0	74	I	1.00152	1.24331	1.12241	20	0.582755	0.519197	Hydrophobic	TM2
0	74	K	1.56334	1.93494	1.74914	13	1.22688	0.70142	(+)	TM2
0	74	L	1.28131	1.52251	1.40191	10	0.483799	0.3451	Hydrophobic	TM2
0	74	M	2.36502	2.56825	2.46664	13	1.66555	0.67523	Hydrophobic	TM2
0	74	N	0.696567	0.72349	0.710028	8	0.720594	1.01488	Amide	TM2
0	74	P	0.457838	0.727293	0.592566	2	0.594149	1.00267	Proline	TM2
0	74	Q	1.29497	1.30862	1.3018	15	0.615159	0.472547	Amide	TM2
0	74	R	1.38021	1.98017	1.68019	11	0.685869	0.408209	(+)	TM2
0	74	T	1.37766	1.50403	1.44084	11	0.561846	0.389942	Nucleophilic	TM2
0	74	V	1.0734	1.21406	1.14373	11	0.507059	0.443339	Hydrophobic	TM2
0	74	W	1.54701	1.67808	1.61254	18	0.51623	0.320134	Aromatic	TM2
0	74	Y	1.18576	1.37337	1.27956	8	0.681604	0.532685	Aromatic	TM2
0	75	A	1.31742	1.75056	1.53399	18	0.735309	0.479344	Small	TM2
0	75	C	1.07156	1.55075	1.31116	10	0.759768	0.579465	Nucleophilic	TM2
0	75	D	1.18354	1.20355	1.19354	16	0.492888	0.412962	(-)	TM2
0	75	E	1.29661	1.37915	1.33788	8	0.58137	0.434546	(-)	TM2
0	75	F	1.1824	1.32928	1.25584	7	0.62871	0.500629	Aromatic	TM2
0	75	G	1.03805	1.05137	1.04471	15	0.499566	0.478187	Small	TM2
0	75	H	1.21199	1.3169	1.26444	12	0.489573	0.387184	(+)	TM2
0	75	I	1.04095	1.35342	1.19718	8	0.38667	0.322984	Hydrophobic	TM2
0	75	K	1.02652	1.04456	1.03554	17	0.513327	0.495708	(+)	TM2
0	75	M	1.67399	2.36204	2.01801	12	1.00094	0.496003	Hydrophobic	TM2
0	75	N	0.904255	0.910371	0.907313	14	0.550243	0.606453	Amide	TM2
0	75	P	0.74162	0.913123	0.827371	12	0.751291	0.908045	Proline	TM2
0	75	Q	1.32921	1.49164	1.41042	8	0.447843	0.317524	Amide	TM2
0	75	R	1.09862	1.29943	1.19903	10	0.399674	0.333333	(+)	TM2
0	75	S	1.3616	1.8956	1.6286	14	1.06951	0.656707	Nucleophilic	TM2
0	75	T	0.829202	1.15366	0.991431	15	0.660129	0.665835	Nucleophilic	TM2
0	75	V	0.941966	1.11594	1.02895	16	0.646782	0.628583	Hydrophobic	TM2
0	75	W	1.09826	1.49635	1.29731	18	1.0431	0.804051	Aromatic	TM2
0	75	Y	1.10203	1.75777	1.4299	13	1.13504	0.793792	Aromatic	TM2
0	76	C	2.05892	2.69157	2.37524	16	1.79869	0.757264	Nucleophilic	TM2
0	76	D	1.38564	1.41799	1.40181	7	0.612632	0.437028	(-)	TM2
0	76	E	0.976219	1.13134	1.05378	17	0.537722	0.510279	(-)	TM2
0	76	F	1.02307	1.07148	1.04728	9	0.40166	0.383528	Aromatic	TM2
0	76	G	1.09391	1.39517	1.24454	10	0.442405	0.355477	Small	TM2
0	76	H	1.15747	1.38865	1.27306	11	0.598607	0.470212	(+)	TM2
0	76	I	1.19968	1.7187	1.45919	17	0.638616	0.437651	Hydrophobic	TM2
0	76	K	1.27183	1.42987	1.35085	14	0.520426	0.385258	(+)	TM2
0	76	L	1.37534	2.12645	1.75089	10	1.68129	0.960245	Hydrophobic	TM2
0	76	M	0.698438	1.07208	0.885259	18	0.611342	0.69058	Hydrophobic	TM2
0	76	N	0.846476	1.20812	1.0273	8	0.556202	0.541422	Amide	TM2
0	76	P	1.25193	1.36565	1.30879	12	0.285586	0.218207	Proline	TM2
0	76	Q	1.02249	1.17083	1.09666	11	0.559218	0.509927	Amide	TM2
0	76	R	1.58793	1.70481	1.64637	18	0.705432	0.428476	(+)	TM2
0	76	S	1.46728	1.6915	1.57939	12	0.46727	0.295855	Nucleophilic	TM2
0	76	T	1.28209	1.31983	1.30096	10	0.544939	0.418875	Nucleophilic	TM2
0	76	V	1.91196	3.01993	2.46594	21	3.3951	1.37679	Hydrophobic	TM2
0	76	W	1.0583	1.10254	1.08042	12	0.406913	0.376624	Aromatic	TM2
0	76	Y	1.18556	1.26195	1.22375	9	0.543981	0.444519	Aromatic	TM2
0	77	A	1.54859	1.73702	1.64281	10	0.709993	0.432183	Small	TM2
0	77	D	0.877217	1.30952	1.09337	19	0.79747	0.729371	(-)	TM2
0	77	E	1.47149	1.48085	1.47617	13	0.451185	0.305647	(-)	TM2
0	77	F	2.00315	2.21701	2.11008	5	0.315979	0.149747	Aromatic	TM2
0	77	G	1.49278	2.20837	1.85058	13	0.63451	0.342872	Small	TM2
0	77	H	1.45653	1.79769	1.62711	9	0.715527	0.439754	(+)	TM2
0	77	I	1.49855	3.53053	2.51454	9	2.50848	0.99759	Hydrophobic	TM2
0	77	K	1.10205	1.27075	1.1864	14	0.942114	0.794096	(+)	TM2
0	77	L	2.00663	2.54531	2.27597	11	1.45791	0.640568	Hydrophobic	TM2
0	77	M	2.07564	3.07655	2.5761	13	2.51765	0.977311	Hydrophobic	TM2
0	77	N	1.3017	1.47594	1.38882	19	0.614568	0.442511	Amide	TM2
0	77	P	1.02449	1.07218	1.04833	14	0.291559	0.278117	Proline	TM2
0	77	Q	1.13644	1.38939	1.26291	11	0.595428	0.471471	Amide	TM2
0	77	R	1.04051	1.32825	1.18438	14	0.710748	0.6001	(+)	TM2
0	77	S	0.837926	1.12964	0.983783	8	0.915247	0.930334	Nucleophilic	TM2
0	77	T	1.86162	2.33833	2.09998	11	1.11393	0.530451	Nucleophilic	TM2
0	77	V	0.877379	1.49018	1.18378	8	0.800076	0.675867	Hydrophobic	TM2
0	77	W	1.09599	1.29095	1.19347	11	0.724149	0.606758	Aromatic	TM2
0	77	Y	1.3108	1.33289	1.32184	9	0.723316	0.547203	Aromatic	TM2
0	78	C	1.36243	1.37349	1.36796	13	0.568501	0.415583	Nucleophilic	TM2
0	78	D	1.39701	1.58068	1.48884	19	0.800544	0.537696	(-)	TM2
0	78	E	1.30989	1.37469	1.34229	11	0.496567	0.36994	(-)	TM2
0	78	F	0.884837	1.04401	0.964424	19	0.475935	0.493492	Aromatic	TM2
0	78	G	1.12188	1.29507	1.20848	12	0.546102	0.451893	Small	TM2
0	78	H	0.994656	1.08376	1.03921	17	0.687075	0.661153	(+)	TM2
0	78	I	1.17631	1.28296	1.22964	12	0.63462	0.516103	Hydrophobic	TM2
0	78	K	1.07555	1.88012	1.47784	15	1.6996	1.15006	(+)	TM2
0	78	L	1.21304	1.45862	1.33583	15	0.549931	0.411677	Hydrophobic	TM2
0	78	M	1.11878	1.28651	1.20264	14	0.578549	0.481064	Hydrophobic	TM2
0	78	N	1.20318	1.22845	1.21582	9	0.625915	0.514811	Amide	TM2
0	78	P	1.21238	1.44639	1.32938	13	0.327524	0.246373	Proline	TM2
0	78	Q	1.33094	1.63546	1.4832	15	1.07017	0.721524	Amide	TM2
0	78	R	1.08819	1.29835	1.19327	14	0.380518	0.318886	(+)	TM2
0	78	S	1.72195	2.33043	2.02619	12	0.854499	0.421727	Nucleophilic	TM2
0	78	T	1.41007	1.43432	1.42219	16	0.524544	0.368828	Nucleophilic	TM2
0	78	V	1.27531	1.43967	1.35749	11	0.709037	0.522315	Hydrophobic	TM2
0	78	W	1.16266	1.47058	1.31662	13	0.70265	0.533676	Aromatic	TM2
0	78	Y	1.13993	1.18718	1.16356	12	0.669165	0.575103	Aromatic	TM2
0	79	A	1.2333	1.54757	1.39043	4	1.10627	0.795632	Small	TM2
0	79	C	1.45211	1.57849	1.5153	14	0.719557	0.474862	Nucleophilic	TM2
0	79	E	1.33702	1.4294	1.38321	17	0.416443	0.30107	(-)	TM2
0	79	F	1.16067	1.19537	1.17802	12	0.606131	0.514534	Aromatic	TM2
0	79	G	0.716247	0.865632	0.79094	9	0.661389	0.836206	Small	TM2
0	79	H	1.01818	1.08811	1.05314	20	0.435364	0.413395	(+)	TM2
0	79	I	0.970999	1.49646	1.23373	10	0.6812	0.552146	Hydrophobic	TM2
0	79	K	0.859419	0.915034	0.887226	15	0.469154	0.528787	(+)	TM2
0	79	L	0.890462	1.23118	1.06082	12	0.603368	0.568774	Hydrophobic	TM2
0	79	M	1.04852	1.11713	1.08283	13	0.429256	0.396422	Hydrophobic	TM2
0	79	N	1.22275	1.25346	1.23811	8	0.433977	0.350517	Amide	TM2
0	79	P	1.36947	1.50176	1.43561	10	0.76913	0.535751	Proline	TM2
0	79	Q	1.02012	1.11079	1.06546	13	0.528953	0.496457	Amide	TM2
0	79	R	0.946182	1.29152	1.11885	9	0.703239	0.628537	(+)	TM2
0	79	S	1.21479	1.38439	1.29959	11	0.639447	0.492036	Nucleophilic	TM2
0	79	T	1.23978	1.36693	1.30335	8	0.535463	0.410835	Nucleophilic	TM2
0	79	V	1.1136	1.23964	1.17662	13	0.58719	0.499048	Hydrophobic	TM2
0	79	W	0.838774	1.2622	1.05049	13	0.655553	0.624047	Aromatic	TM2
0	79	Y	1.67408	1.8473	1.76069	16	1.18288	0.671829	Aromatic	TM2
0	80	A	1.8741	2.27812	2.07611	11	1.01797	0.490326	Small	TM2
0	80	C	1.46971	2.01202	1.74087	13	1.12175	0.644362	Nucleophilic	TM2
0	80	D	1.13752	2.07263	1.60507	6	0.97048	0.604633	(-)	TM2
0	80	E	0.89157	1.12173	1.00665	12	0.598944	0.594989	(-)	TM2
0	80	F	1.74279	1.76319	1.75299	13	1.05507	0.601869	Aromatic	TM2
0	80	G	1.41668	1.85974	1.63821	10	1.05169	0.641977	Small	TM2
0	80	H	0.989461	1.48515	1.2373	17	0.909343	0.73494	(+)	TM2
0	80	I	1.95403	2.32766	2.14084	17	0.83303	0.389113	Hydrophobic	TM2
0	80	K	1.07107	1.6543	1.36268	16	0.795782	0.583981	(+)	TM2
0	80	M	1.83871	3.46397	2.65134	9	1.36122	0.513409	Hydrophobic	TM2
0	80	N	1.06289	1.49428	1.27859	15	0.48933	0.382712	Amide	TM2
0	80	P	1.19962	1.25765	1.22863	13	0.523011	0.425686	Proline	TM2
0	80	Q	1.41781	1.66208	1.53994	13	0.750324	0.487241	Amide	TM2
0	80	R	1.18637	1.41055	1.29846	16	0.646667	0.498027	(+)	TM2
0	80	S	1.36911	1.42876	1.39893	16	0.586458	0.419218	Nucleophilic	TM2
0	80	T	1.30472	1.50353	1.40412	14	0.556553	0.39637	Nucleophilic	TM2
0	80	V	1.28047	2.20413	1.7423	13	1.12069	0.643225	Hydrophobic	TM2
0	80	W	1.66033	1.69285	1.67659	15	0.704086	0.419951	Aromatic	TM2
0	80	Y	1.04282	1.09522	1.06902	12	0.470677	0.440288	Aromatic	TM2
0	81	A	1.78164	1.86978	1.82571	13	1.04224	0.570871	Small	TM2
0	81	C	2.4154	3.18079	2.7981	10	1.06533	0.380735	Nucleophilic	TM2
0	81	D	1.31949	1.38342	1.35145	13	0.669301	0.495246	(-)	TM2
0	81	E	1.01288	1.04975	1.03132	14	0.537387	0.521069	(-)	TM2
0	81	F	1.38758	2.04968	1.71863	12	1.05762	0.615384	Aromatic	TM2
0	81	G	1.82453	3.2346	2.52956	11	1.65117	0.652749	Small	TM2
0	81	H	1.1435	1.15928	1.15139	10	0.371265	0.32245	(+)	TM2
0	81	I	1.48363	1.51715	1.50039	5	0.826435	0.550815	Hydrophobic	TM2
0	81	K	1.34077	1.47799	1.40938	15	0.402158	0.285344	(+)	TM2
0	81	L	1.57379	1.68719	1.63049	8	1.12388	0.689289	Hydrophobic	TM2
0	81	M	1.74488	2.06797	1.90642	10	1.48198	0.77736	Hydrophobic	TM2
0	81	N	1.04084	1.18348	1.11216	10	0.292379	0.262893	Amide	TM2
0	81	P	1.01242	1.22224	1.11733	16	0.903196	0.80835	Proline	TM2
0	81	Q	1.11291	1.39199	1.25245	10	0.70657	0.564151	Amide	TM2
0	81	R	1.09334	1.83776	1.46555	5	0.667885	0.455724	(+)	TM2
0	81	S	1.80096	1.91947	1.86022	15	0.509602	0.273948	Nucleophilic	TM2
0	81	T	1.54545	1.64741	1.59643	14	0.704947	0.441577	Nucleophilic	TM2
0	81	W	1.18633	1.34104	1.26369	15	0.765102	0.605451	Aromatic	TM2
0	81	Y	1.24973	1.30346	1.2766	21	0.638494	0.500153	Aromatic	TM2
0	82	A	1.31755	1.9578	1.63768	16	1.3299	0.812063	Small	TM2
0	82	C	1.14463	1.27225	1.20844	15	0.492535	0.407578	Nucleophilic	TM2
0	82	D	0.908085	1.0823	0.995192	13	0.481637	0.483963	(-)	TM2
0	82	E	1.47128	1.56927	1.52028	12	0.548086	0.360517	(-)	TM2
0	82	F	0.858146	1.03967	0.948909	13	0.385024	0.405754	Aromatic	TM2
0	82	G	1.2899	1.43136	1.36063	13	0.614123	0.451352	Small	TM2
0	82	H	1.32961	1.39626	1.36294	19	0.550285	0.40375	(+)	TM2
0	82	I	1.37703	2.35003	1.86353	5	1.30339	0.699424	Hydrophobic	TM2
0	82	K	1.56941	1.57984	1.57462	15	0.671579	0.426501	(+)	TM2
0	82	L	1.91803	2.00492	1.96148	7	1.24633	0.635402	Hydrophobic	TM2
0	82	N	0.93392	1.6167	1.27531	9	0.347906	0.2728	Amide	TM2
0	82	P	1.02016	1.11985	1.07	13	0.475838	0.444707	Proline	TM2
0	82	Q	1.15586	1.16592	1.16089	6	0.703658	0.606136	Amide	TM2
0	82	R	1.09649	1.66863	1.38256	16	0.642948	0.465042	(+)	TM2
0	82	S	1.08285	1.4714	1.27713	6	0.310876	0.243418	Nucleophilic	TM2
0	82	T	1.49064	1.91109	1.70086	7	0.709029	0.416864	Nucleophilic	TM2
0	82	V	1.69897	2.86165	2.28031	11	1.70533	0.747849	Hydrophobic	TM2
0	82	W	1.46064	2.17228	1.81646	12	1.12399	0.618781	Aromatic	TM2
0	82	Y	1.17958	1.35165	1.26562	11	0.415174	0.328041	Aromatic	TM2
0	83	A	0.871244	1.16495	1.0181	15	0.741178	0.728004	Small	TM2
0	83	C	1.16831	1.46326	1.31578	12	0.609964	0.463575	Nucleophilic	TM2
0	83	D	1.09647	1.31408	1.20527	16	0.400566	0.332346	(-)	TM2
0	83	E	0.838626	1.02456	0.931595	10	0.448429	0.481356	(-)	TM2
0	83	F	1.49535	1.62605	1.5607	11	0.400116	0.25637	Aromatic	TM2
0	83	H	1.34016	1.56572	1.45294	11	0.875346	0.602466	(+)	TM2
0	83	I	1.12104	1.50268	1.31186	12	0.42263	0.32216	Hydrophobic	TM2
0	83	K	1.0435	1.05894	1.05122	8	0.679489	0.646382	(+)	TM2
0	83	L	1.02403	1.0702	1.04711	12	0.523736	0.500171	Hydrophobic	TM2
0	83	M	1.06109	1.18603	1.12356	14	0.726591	0.646684	Hydrophobic	TM2
0	83	N	1.4956	2.08986	1.79273	14	0.821798	0.458406	Amide	TM2
0	83	P	1.34201	1.45409	1.39805	12	0.48433	0.346433	Proline	TM2
0	83	Q	1.23118	1.30262	1.2669	15	0.840866	0.663719	Amide	TM2
0	83	R	1.10849	1.44467	1.27658	20	0.910634	0.713339	(+)	TM2
0	83	S	1.31356	1.42047	1.36702	23	0.546373	0.399682	Nucleophilic	TM2
0	83	T	1.16861	3.25218	2.2104	11	3.16023	1.42971	Nucleophilic	TM2
0	83	V	0.931609	1.15364	1.04263	16	0.536404	0.514474	Hydrophobic	TM2
0	83	W	1.51034	1.69631	1.60333	12	0.985911	0.614916	Aromatic	TM2
0	83	Y	1.35139	1.54884	1.45011	14	0.792707	0.546651	Aromatic	TM2
0	84	A	1.64086	2.38259	2.01172	16	2.11828	1.05297	Small	TM2
0	84	C	2.195	2.31555	2.25528	10	0.980769	0.434877	Nucleophilic	TM2
0	84	D	1.21556	1.23478	1.22517	18	0.476214	0.388692	(-)	TM2
0	84	E	0.80944	0.818123	0.813781	10	0.465092	0.571519	(-)	TM2
0	84	F	1.79743	2.93617	2.3668	15	1.51244	0.639024	Aromatic	TM2
0	84	G	1.80648	2.01332	1.9099	11	0.913758	0.478432	Small	TM2
0	84	H	1.20956	1.25919	1.23438	9	0.446063	0.361367	(+)	TM2
0	84	I	1.84617	3.0764	2.46128	7	2.36057	0.95908	Hydrophobic	TM2
0	84	K	1.35189	1.42298	1.38743	7	0.528182	0.38069	(+)	TM2
0	84	M	1.55652	1.7803	1.66841	11	0.974492	0.584084	Hydrophobic	TM2
0	84	N	1.43627	1.77052	1.6034	21	0.896113	0.558885	Amide	TM2
0	84	P	1.67598	1.90724	1.79161	6	0.696602	0.388813	Proline	TM2
0	84	Q	1.0364	1.31606	1.17623	14	0.598717	0.509015	Amide	TM2
0	84	R	1.13064	1.19851	1.16458	13	0.583333	0.500897	(+)	TM2
0	84	S	1.68354	1.72322	1.70338	12	0.955885	0.561169	Nucleophilic	TM2
0	84	T	1.49436	1.77173	1.63304	19	0.680953	0.416984	Nucleophilic	TM2
0	84	V	1.43514	2.10404	1.76959	12	1.4534	0.82132	Hydrophobic	TM2
0	84	W	1.13652	1.20102	1.16877	16	0.58587	0.501269	Aromatic	TM2
0	84	Y	1.19358	1.39679	1.29518	9	0.472299	0.364658	Aromatic	TM2
0	85	C	1.22231	1.52338	1.37285	8	0.717367	0.52254	Nucleophilic	TM2
0	85	D	1.0115	1.14084	1.07617	11	0.612825	0.569449	(-)	TM2
0	85	E	1.09251	1.29898	1.19574	14	0.430291	0.359852	(-)	TM2
0	85	F	1.66915	1.8802	1.77467	7	0.87557	0.493371	Aromatic	TM2
0	85	G	1.67841	2.0296	1.854	13	0.911027	0.491384	Small	TM2
0	85	H	0.751094	0.938272	0.844683	10	0.464941	0.550433	(+)	TM2
0	85	I	2.54141	2.66105	2.60123	15	1.29189	0.496646	Hydrophobic	TM2
0	85	K	1.44835	1.48713	1.46774	22	0.748426	0.509918	(+)	TM2
0	85	L	1.75136	1.89847	1.82491	17	1.08895	0.59671	Hydrophobic	TM2
0	85	M	1.53469	2.29994	1.91732	9	1.48551	0.774788	Hydrophobic	TM2
0	85	N	1.06268	1.12048	1.09158	14	0.523238	0.47934	Amide	TM2
0	85	P	1.26766	1.29762	1.28264	8	0.557384	0.43456	Proline	TM2
0	85	Q	1.42275	1.8498	1.63627	7	0.859653	0.525372	Amide	TM2
0	85	R	1.0889	1.14731	1.1181	15	0.439262	0.392863	(+)	TM2
0	85	S	2.42536	2.73732	2.58134	19	1.57137	0.608743	Nucleophilic	TM2
0	85	T	3.04389	3.2259	3.13489	13	1.9628	0.626116	Nucleophilic	TM2
0	85	V	1.79769	2.21278	2.00524	15	1.2241	0.61045	Hydrophobic	TM2
0	85	W	1.04014	1.99881	1.51948	11	1.21556	0.799984	Aromatic	TM2
0	85	Y	1.59583	2.8444	2.22011	16	2.27508	1.02476	Aromatic	TM2
0	86	A	1.23259	1.44055	1.33657	10	0.957041	0.716044	Small	TM2
0	86	C	1.57077	2.25367	1.91222	7	1.25483	0.656213	Nucleophilic	TM2
0	86	D	1.38662	1.84305	1.61484	9	1.5415	0.954585	(-)	TM2
0	86	E	1.23037	1.23949	1.23493	14	0.555924	0.450167	(-)	TM2
0	86	F	1.36049	1.55065	1.45557	11	0.533089	0.36624	Aromatic	TM2
0	86	G	1.26108	1.29238	1.27673	14	0.519159	0.406631	Small	TM2
0	86	H	1.05442	1.10184	1.07813	4	0.268802	0.249322	(+)	TM2
0	86	I	1.25071	1.35484	1.30278	19	0.743538	0.570734	Hydrophobic	TM2
0	86	K	1.03163	1.12259	1.07711	17	0.375686	0.348791	(+)	TM2
0	86	L	1.01114	1.09436	1.05275	18	0.567334	0.538907	Hydrophobic	TM2
0	86	M	1.11572	1.60847	1.36209	9	1.20832	0.887101	Hydrophobic	TM2
0	86	N	1.04363	1.08571	1.06467	16	0.449136	0.421855	Amide	TM2
0	86	P	1.22	1.54349	1.38175	18	0.393374	0.284693	Proline	TM2
0	86	Q	1.00808	1.08437	1.04622	13	0.428403	0.409475	Amide	TM2
0	86	R	0.772969	0.93159	0.85228	18	0.480208	0.56344	(+)	TM2
0	86	S	1.10785	1.23441	1.17113	16	0.690409	0.589523	Nucleophilic	TM2
0	86	T	0.858036	1.10213	0.980082	13	0.4506	0.459757	Nucleophilic	TM2
0	86	W	1.2006	1.43947	1.32004	14	0.462114	0.350076	Aromatic	TM2
0	86	Y	1.054	1.10273	1.07836	14	0.494172	0.458261	Aromatic	TM2
0	87	A	1.41752	2.62458	2.02105	5	0.78242	0.387136	Small	TM2
0	87	C	2.09539	2.17553	2.13546	8	1.28963	0.603911	Nucleophilic	TM2
0	87	D	0.975502	1.18747	1.08148	16	0.757799	0.700702	(-)	TM2
0	87	E	0.688214	1.01557	0.851891	6	0.551353	0.647211	(-)	TM2
0	87	F	1.36131	1.48175	1.42153	23	0.653648	0.45982	Aromatic	TM2
0	87	G	0.987824	1.17438	1.0811	7	0.446467	0.412974	Small	TM2
0	87	H	1.46644	1.7615	1.61397	19	0.710613	0.440289	(+)	TM2
0	87	I	1.8242	2.74971	2.28696	5	1.3872	0.606569	Hydrophobic	TM2
0	87	K	0.901569	1.20327	1.05242	13	0.386889	0.367618	(+)	TM2
0	87	L	3.29462	4.98996	4.14229	14	4.564	1.10181	Hydrophobic	TM2
0	87	M	2.50704	2.86765	2.68734	12	1.52912	0.569009	Hydrophobic	TM2
0	87	N	1.2299	1.26322	1.24656	18	0.508009	0.407528	Amide	TM2
0	87	P	1.38059	1.43907	1.40983	16	0.678492	0.481257	Proline	TM2
0	87	Q	1.3649	1.49144	1.42817	16	0.655116	0.45871	Amide	TM2
0	87	R	1.18298	1.3759	1.27944	10	0.707284	0.552808	(+)	TM2
0	87	S	1.23649	1.3687	1.3026	20	0.559634	0.42963	Nucleophilic	TM2
0	87	T	2.76095	2.80055	2.78075	7	1.82492	0.656271	Nucleophilic	TM2
0	87	W	1.66238	1.66305	1.66271	10	0.685726	0.412413	Aromatic	TM2
0	87	Y	1.11225	1.37398	1.24312	17	0.562149	0.45221	Aromatic	TM2
0	88	A	1.15712	1.26916	1.21314	15	0.741321	0.611077	Small	TM2
0	88	C	1.34815	1.36408	1.35611	19	0.572169	0.421918	Nucleophilic	TM2
0	88	D	1.16414	1.25095	1.20755	11	0.613127	0.507746	(-)	TM2
0	88	E	1.31271	1.31675	1.31473	18	0.610312	0.46421	(-)	TM2
0	88	F	1.13781	1.38381	1.26081	16	0.722026	0.57267	Aromatic	TM2
0	88	G	1.19931	1.58127	1.39029	10	0.521185	0.374875	Small	TM2
0	88	H	1.2545	1.34841	1.30145	20	0.718144	0.551801	(+)	TM2
0	88	I	1.10597	1.5696	1.33778	15	0.812864	0.60762	Hydrophobic	TM2
0	88	K	1.12363	1.13708	1.13035	22	0.406769	0.359861	(+)	TM2
0	88	L	1.06586	1.15735	1.1116	17	0.533073	0.479554	Hydrophobic	TM2
0	88	M	0.805755	1.36971	1.08773	13	0.809939	0.744611	Hydrophobic	TM2
0	88	N	1.05834	1.13687	1.0976	30	0.528897	0.481865	Amide	TM2
0	88	Q	1.22043	1.28792	1.25418	16	0.492609	0.392775	Amide	TM2
0	88	R	1.32864	1.35096	1.3398	12	0.482651	0.36024	(+)	TM2
0	88	S	1.55199	1.76722	1.65961	15	1.03079	0.621107	Nucleophilic	TM2
0	88	T	1.47966	2.13466	1.80716	18	1.49868	0.8293	Nucleophilic	TM2
0	88	V	1.29567	1.51911	1.40739	15	0.535633	0.380586	Hydrophobic	TM2
0	88	W	1.25682	1.47255	1.36468	18	0.683623	0.500939	Aromatic	TM2
0	88	Y	1.01615	1.30988	1.16302	20	0.573433	0.493056	Aromatic	TM2
0	89	A	1.88611	2.06882	1.97747	13	1.55558	0.786655	Small	TM2
0	89	C	1.2277	1.57477	1.40123	27	0.873508	0.623385	Nucleophilic	TM2
0	89	D	1.82849	2.05427	1.94138	15	1.72713	0.889641	(-)	TM2
0	89	E	1.22361	1.23911	1.23136	15	0.463474	0.376392	(-)	TM2
0	89	G	1.98616	2.10778	2.04697	13	1.19198	0.582315	Small	TM2
0	89	H	1.40908	1.4624	1.43574	12	0.365081	0.254282	(+)	TM2
0	89	I	1.78438	1.90238	1.84338	9	1.73619	0.941849	Hydrophobic	TM2
0	89	K	1.21586	1.2633	1.23958	22	0.582503	0.469919	(+)	TM2
0	89	L	1.85141	2.55576	2.20358	15	1.7943	0.814266	Hydrophobic	TM2
0	89	M	2.04618	2.28642	2.1663	7	1.02978	0.475362	Hydrophobic	TM2
0	89	N	0.980181	1.12072	1.05045	12	0.560083	0.533185	Amide	TM2
0	89	P	1.35903	1.74129	1.55016	9	0.73891	0.476668	Proline	TM2
0	89	Q	1.44938	1.92251	1.68595	14	0.647167	0.38386	Amide	TM2
0	89	R	1.45714	1.9753	1.71622	10	0.550609	0.320826	(+)	TM2
0	89	S	1.08058	1.34872	1.21465	13	0.9596	0.790021	Nucleophilic	TM2
0	89	T	1.34586	1.93944	1.64265	5	0.84461	0.514175	Nucleophilic	TM2
0	89	V	1.90591	2.13503	2.02047	18	1.30109	0.643956	Hydrophobic	TM2
0	89	W	1.61599	2.62377	2.11988	9	1.21441	0.572867	Aromatic	TM2
0	89	Y	1.06289	1.35043	1.20666	17	0.962536	0.797687	Aromatic	TM2
0	90	A	1.33123	1.94374	1.63749	13	1.11732	0.68234	Small	TM2
0	90	C	2.13746	2.88453	2.511	5	0.551744	0.219731	Nucleophilic	TM2
0	90	D	1.31721	1.40822	1.36271	15	0.650323	0.477228	(-)	TM2
0	90	E	1.52051	1.77416	1.64734	10	0.865712	0.525522	(-)	TM2
0	90	F	1.57489	1.9934	1.78414	8	0.980062	0.549318	Aromatic	TM2
0	90	H	1.63682	1.92398	1.7804	15	1.08262	0.608075	(+)	TM2
0	90	I	0.987665	1.31163	1.14965	7	0.618792	0.538245	Hydrophobic	TM2
0	90	K	0.85482	1.74904	1.30193	11	1.576	1.21051	(+)	TM2
0	90	L	1.34434	1.4893	1.41682	10	0.190145	0.134206	Hydrophobic	TM2
0	90	M	1.75174	2.65986	2.2058	8	2.14284	0.971458	Hydrophobic	TM2
0	90	N	1.80858	2.39801	2.10329	9	1.33949	0.636851	Amide	TM2
0	90	P	1.06558	1.14867	1.10712	7	0.495988	0.447997	Proline	TM2
0	90	Q	1.58703	1.98853	1.78778	8	1.17354	0.656422	Amide	TM2
0	90	R	0.958178	1.03443	0.996303	11	0.592013	0.59421	(+)	TM2
0	90	S	2.32495	2.85856	2.59175	8	2.00252	0.772653	Nucleophilic	TM2
0	90	T	1.7911	1.8338	1.81245	11	0.558265	0.308017	Nucleophilic	TM2
0	90	V	1.0355	1.05782	1.04666	16	0.490793	0.468912	Hydrophobic	TM2
0	90	W	1.82417	2.40285	2.11351	15	1.1542	0.546104	Aromatic	TM2
0	90	Y	1.11638	1.49051	1.30344	15	0.799921	0.613698	Aromatic	TM2
0	91	C	1.71691	1.95388	1.8354	10	0.785932	0.428208	Nucleophilic	TM2
0	91	D	1.19208	1.35255	1.27231	8	0.427738	0.33619	(-)	TM2
0	91	E	1.85015	1.99054	1.92035	13	1.53223	0.79789	(-)	TM2
0	91	F	1.64061	1.90915	1.77488	9	0.534405	0.301093	Aromatic	TM2
0	91	G	1.99614	2.21482	2.10548	16	0.759014	0.360495	Small	TM2
0	91	H	1.18821	1.45114	1.31968	11	0.663466	0.502749	(+)	TM2
0	91	I	1.62827	1.89372	1.76099	9	1.07904	0.612745	Hydrophobic	TM2
0	91	K	0.98762	1.09388	1.04075	18	0.505536	0.485742	(+)	TM2
0	91	L	2.01074	2.94045	2.4756	10	2.35039	0.949424	Hydrophobic	TM2
0	91	M	2.56512	2.99703	2.78108	12	1.9555	0.703145	Hydrophobic	TM2
0	91	N	0.701195	0.746674	0.723935	14	0.394674	0.545178	Amide	TM2
0	91	P	1.11006	1.11414	1.1121	12	0.559995	0.503548	Proline	TM2
0	91	Q	1.6792	1.87079	1.77499	11	0.954166	0.537561	Amide	TM2
0	91	R	0.980131	0.98282	0.981476	15	0.560773	0.571357	(+)	TM2
0	91	S	1.80477	1.94864	1.8767	11	0.928129	0.494553	Nucleophilic	TM2
0	91	T	1.55805	1.7316	1.64483	18	0.848164	0.515656	Nucleophilic	TM2
0	91	V	1.58765	2.04781	1.81773	18	1.11894	0.61557	Hydrophobic	TM2
0	91	W	1.14322	1.26276	1.20299	18	0.592061	0.492157	Aromatic	TM2
0	91	Y	1.23621	1.29864	1.26742	13	0.677263	0.534362	Aromatic	TM2
0	92	C	1.27706	2.12949	1.70328	13	1.12516	0.660585	Nucleophilic	TM2
0	92	D	1.13969	1.16302	1.15136	19	0.552795	0.480124	(-)	TM2
0	92	E	1.46521	2.14762	1.80642	13	1.23092	0.681417	(-)	TM2
0	92	F	1.62312	1.77979	1.70145	9	0.7577	0.445325	Aromatic	TM2
0	92	G	2.08473	2.29553	2.19013	19	1.54518	0.70552	Small	TM2
0	92	H	2.23661	2.28976	2.26319	3	0.325124	0.143658	(+)	TM2
0	92	I	2.08096	2.54318	2.31207	18	1.01953	0.44096	Hydrophobic	TM2
0	92	K	2.46882	3.43799	2.95341	8	1.37794	0.466561	(+)	TM2
0	92	L	2.09582	3.16288	2.62935	9	0.979311	0.372453	Hydrophobic	TM2
0	92	M	1.72397	2.42364	2.07381	13	1.11122	0.535834	Hydrophobic	TM2
0	92	N	1.37763	1.56517	1.4714	7	0.760631	0.516945	Amide	TM2
0	92	P	0.956235	1.29009	1.12316	12	0.584077	0.520028	Proline	TM2
0	92	Q	2.11671	2.61081	2.36376	10	1.5967	0.675491	Amide	TM2
0	92	R	1.54861	1.90226	1.72543	13	0.510675	0.295969	(+)	TM2
0	92	S	2.5072	2.63702	2.57211	13	1.69429	0.658715	Nucleophilic	TM2
0	92	T	2.34198	2.54731	2.44465	11	1.51871	0.62124	Nucleophilic	TM2
0	92	V	1.34418	1.57509	1.45963	12	0.658358	0.451043	Hydrophobic	TM2
0	92	W	1.43261	1.59058	1.5116	6	0.797518	0.5276	Aromatic	TM2
0	92	Y	1.96558	2.20181	2.08369	11	1.11606	0.535616	Aromatic	TM2
0	93	A	1.47606	1.74079	1.60843	14	0.91786	0.570657	Small	TM2
0	93	C	1.33588	1.66264	1.49926	14	0.863562	0.575992	Nucleophilic	TM2
0	93	D	1.76613	1.78004	1.77309	17	1.00144	0.564799	(-)	TM2
0	93	E	1.17748	1.23265	1.20506	14	0.453101	0.375997	(-)	TM2
0	93	F	1.64073	1.7946	1.71767	14	0.784253	0.456581	Aromatic	TM2
0	93	G	1.47967	1.72941	1.60454	14	0.777331	0.484457	Small	TM2
0	93	I	0.935206	1.15915	1.04718	8	0.660625	0.630861	Hydrophobic	TM2
0	93	K	1.35522	1.63463	1.49493	13	0.720842	0.482193	(+)	TM2
0	93	L	1.30137	1.80571	1.55354	12	0.923857	0.594678	Hydrophobic	TM2
0	93	M	1.62292	1.6663	1.64461	14	1.35909	0.826389	Hydrophobic	TM2
0	93	N	1.93991	2.57192	2.25591	10	0.7264	0.321998	Amide	TM2
0	93	P	1.21099	1.37058	1.29078	9	0.595369	0.461246	Proline	TM2
0	93	Q	1.22386	1.41354	1.3187	16	0.914626	0.693581	Amide	TM2
0	93	R	1.06409	1.42616	1.24512	9	0.662358	0.531962	(+)	TM2
0	93	S	1.37822	1.63424	1.50623	11	0.922283	0.612313	Nucleophilic	TM2
0	93	T	1.75735	1.85847	1.80791	15	0.699647	0.386992	Nucleophilic	TM2
0	93	V	1.35564	1.89945	1.62754	12	1.31361	0.807112	Hydrophobic	TM2
0	93	W	1.65781	2.85004	2.25393	11	2.38443	1.0579	Aromatic	TM2
0	93	Y	1.36415	1.65384	1.509	14	0.593147	0.393073	Aromatic	TM2
0	94	A	1.78456	1.90069	1.84262	17	0.849551	0.461055	Small	TM2
0	94	C	1.47762	1.86601	1.67181	8	0.853857	0.510737	Nucleophilic	TM2
0	94	D	1.37853	1.39524	1.38689	10	0.694138	0.500501	(-)	TM2
0	94	E	1.65957	2.09646	1.87801	9	0.958704	0.510489	(-)	TM2
0	94	F	1.33422	1.65228	1.49325	16	0.576002	0.385737	Aromatic	TM2
0	94	G	1.53941	3.16699	2.3532	9	1.5321	0.651071	Small	TM2
0	94	H	1.69085	1.78908	1.73997	17	0.625091	0.359255	(+)	TM2
0	94	K	1.1329	1.45994	1.29642	16	1.17222	0.904197	(+)	TM2
0	94	L	2.07315	2.21579	2.14447	13	0.991425	0.462317	Hydrophobic	TM2
0	94	M	1.42544	1.68406	1.55475	15	0.823499	0.529667	Hydrophobic	TM2
0	94	N	1.98455	2.12919	2.05687	9	1.02617	0.498898	Amide	TM2
0	94	P	0.932688	1.01374	0.973212	7	0.454341	0.466846	Proline	TM2
0	94	Q	1.44796	1.52401	1.48598	12	0.912707	0.614211	Amide	TM2
0	94	R	1.47742	1.9017	1.68956	11	1.25783	0.74447	(+)	TM2
0	94	S	1.29272	1.40897	1.35084	12	0.901738	0.667537	Nucleophilic	TM2
0	94	T	1.33401	1.57717	1.45559	13	0.941333	0.646702	Nucleophilic	TM2
0	94	V	1.45364	1.94278	1.69821	11	0.972906	0.572901	Hydrophobic	TM2
0	94	W	1.72526	1.97712	1.85119	8	1.29534	0.699733	Aromatic	TM2
0	94	Y	1.25279	1.86519	1.55899	16	0.758176	0.486326	Aromatic	TM2
0	95	A	1.58955	1.60833	1.59894	14	0.793441	0.49623	Small	TM2
0	95	C	1.15574	1.33029	1.24301	12	0.699511	0.562754	Nucleophilic	TM2
0	95	D	1.24989	1.26589	1.25789	8	0.473694	0.376577	(-)	TM2
0	95	E	1.67947	1.8395	1.75949	24	1.1596	0.659055	(-)	TM2
0	95	F	1.72241	2.12208	1.92225	7	0.657235	0.34191	Aromatic	TM2
0	95	G	0.670226	1.12919	0.899707	7	0.67905	0.754746	Small	TM2
0	95	H	1.78626	2.03674	1.9115	12	1.14582	0.599436	(+)	TM2
0	95	I	2.32422	2.38662	2.35542	18	1.06812	0.453473	Hydrophobic	TM2
0	95	K	1.11859	1.16421	1.1414	13	0.554234	0.485574	(+)	TM2
0	95	M	2.20183	3.0846	2.64321	13	2.84104	1.07484	Hydrophobic	TM2
0	95	N	1.1443	1.38279	1.26354	8	0.729244	0.577143	Amide	TM2
0	95	P	0.970127	1.14252	1.05632	18	0.562141	0.532168	Proline	TM2
0	95	Q	2.64788	2.68837	2.66813	10	1.57241	0.589332	Amide	TM2
0	95	R	1.10387	1.21376	1.15881	6	0.48293	0.416745	(+)	TM2
0	95	S	2.67814	3.36577	3.02195	8	1.27081	0.420524	Nucleophilic	TM2
0	95	T	1.25381	2.03276	1.64329	9	0.872257	0.5308	Nucleophilic	TM2
0	95	V	1.08587	2.2876	1.68673	15	1.06156	0.629356	Hydrophobic	TM2
0	95	W	2.022	2.62453	2.32326	11	1.5662	0.674139	Aromatic	TM2
0	95	Y	1.43719	1.48451	1.46085	7	0.517641	0.354343	Aromatic	TM2
0	96	A	2.52609	2.60627	2.56618	12	1.55727	0.606843	Small	TM2
0	96	C	2.00709	2.31165	2.15937	7	1.07655	0.498547	Nucleophilic	TM2
0	96	D	1.61872	3.20386	2.41129	13	2.47994	1.02847	(-)	TM2
0	96	E	1.59322	2.24655	1.91988	8	0.92099	0.479712	(-)	TM2
0	96	F	2.22504	2.67431	2.44967	6	1.16247	0.47454	Aromatic	TM2
0	96	G	1.84051	2.52108	2.18079	8	0.652185	0.299058	Small	TM2
0	96	H	2.42853	2.43306	2.43079	12	1.70977	0.70338	(+)	TM2
0	96	I	1.69705	2.01435	1.8557	7	0.878505	0.473408	Hydrophobic	TM2
0	96	K	2.02731	3.62858	2.82794	10	1.89523	0.670179	(+)	TM2
0	96	L	1.84014	1.92566	1.8829	10	0.710003	0.37708	Hydrophobic	TM2
0	96	N	1.08378	1.65919	1.37148	7	1.45425	1.06035	Amide	TM2
0	96	P	1.75713	2.19813	1.97763	12	1.16583	0.589507	Proline	TM2
0	96	Q	3.35951	4.41661	3.88806	5	1.71387	0.440803	Amide	TM2
0	96	R	1.91419	2.05074	1.98247	11	0.813778	0.410487	(+)	TM2
0	96	S	2.08812	2.22245	2.15528	12	0.816378	0.37878	Nucleophilic	TM2
0	96	T	1.21251	1.44428	1.3284	4	0.737436	0.555132	Nucleophilic	TM2
0	96	V	2.00717	2.44031	2.22374	13	1.19131	0.535724	Hydrophobic	TM2
0	96	W	1.83347	2.14533	1.9894	4	0.501979	0.252327	Aromatic	TM2
0	96	Y	1.82031	2.36141	2.09086	20	1.16343	0.556436	Aromatic	TM2
0	97	A	1.13431	1.51316	1.32374	9	1.01698	0.768263	Small	EC1
0	97	C	1.62594	1.92051	1.77322	15	0.642081	0.362099	Nucleophilic	EC1
0	97	D	1.24074	1.51753	1.37913	13	1.05607	0.765747	(-)	EC1
0	97	E	1.4459	1.49002	1.46796	11	0.829529	0.565091	(-)	EC1
0	97	F	1.08759	1.27104	1.17932	8	0.548478	0.465081	Aromatic	EC1
0	97	G	1.30109	1.93249	1.61679	8	0.738166	0.456561	Small	EC1
0	97	H	1.01428	1.34036	1.17732	14	0.838855	0.712512	(+)	EC1
0	97	I	1.03561	1.19926	1.11744	13	0.619644	0.554523	Hydrophobic	EC1
0	97	L	1.26882	1.74341	1.50612	14	0.725568	0.481748	Hydrophobic	EC1
0	97	M	1.17884	1.35923	1.26903	14	0.67756	0.533919	Hydrophobic	EC1
0	97	N	1.9338	2.1259	2.02985	16	0.985936	0.48572	Amide	EC1
0	97	P	1.62105	2.2663	1.94368	19	1.14766	0.59046	Proline	EC1
0	97	Q	3.3076	3.57322	3.44041	14	2.25227	0.654652	Amide	EC1
0	97	R	1.85962	2.00418	1.9319	12	1.00592	0.520689	(+)	EC1
0	97	S	3.10806	3.25474	3.1814	15	3.43166	1.07866	Nucleophilic	EC1
0	97	T	2.08064	2.38913	2.23488	17	0.741027	0.331573	Nucleophilic	EC1
0	97	V	1.51529	1.86914	1.69222	8	0.702781	0.415302	Hydrophobic	EC1
0	97	W	0.919006	3.00418	1.96159	11	2.84835	1.45206	Aromatic	EC1
0	97	Y	1.42935	1.65196	1.54066	19	0.67091	0.43547	Aromatic	EC1
0	98	A	3.04242	3.3535	3.19796	8	1.74448	0.545498	Small	EC1
0	98	C	0.941337	1.30478	1.12306	8	0.810491	0.721682	Nucleophilic	EC1
0	98	D	2.38609	2.83391	2.61	8	0.96906	0.371287	(-)	EC1
0	98	E	1.41886	1.65366	1.53626	15	0.830162	0.540379	(-)	EC1
0	98	F	2.10967	2.30866	2.20917	16	1.58662	0.718199	Aromatic	EC1
0	98	G	1.69902	2.52426	2.11164	13	2.04912	0.970394	Small	EC1
0	98	H	1.72527	1.84143	1.78335	8	1.20941	0.678165	(+)	EC1
0	98	I	1.76218	3.00377	2.38298	11	1.83482	0.769971	Hydrophobic	EC1
0	98	K	1.47695	1.85448	1.66572	6	0.909856	0.546225	(+)	EC1
0	98	L	2.266	2.58296	2.42448	12	1.2286	0.506747	Hydrophobic	EC1
0	98	N	1.94911	2.31211	2.13061	17	1.53791	0.721819	Amide	EC1
0	98	P	1.8546	2.01621	1.9354	15	1.11998	0.578682	Proline	EC1
0	98	Q	1.97951	2.04066	2.01008	5	1.32377	0.658565	Amide	EC1
0	98	R	1.90451	2.14047	2.02249	9	0.981454	0.485269	(+)	EC1
0	98	S	1.63898	1.64704	1.64301	14	1.06234	0.646584	Nucleophilic	EC1
0	98	T	1.24112	1.51982	1.38047	9	1.04772	0.758959	Nucleophilic	EC1
0	98	V	1.8789	1.92364	1.90127	10	1.04921	0.551847	Hydrophobic	EC1
0	98	W	2.02597	2.3527	2.18933	14	0.907274	0.414406	Aromatic	EC1
0	98	Y	2.00552	2.52953	2.26752	12	1.79572	0.79193	Aromatic	EC1
0	99	A	0.597708	0.644309	0.621008	7	0.378071	0.608802	Small	EC1
0	99	C	1.32666	1.35869	1.34267	26	0.663109	0.493872	Nucleophilic	EC1
0	99	D	0.802618	0.933268	0.867943	13	0.482347	0.555736	(-)	EC1
0	99	E	1.94022	2.74032	2.34027	14	2.83726	1.21237	(-)	EC1
0	99	F	1.17045	1.55639	1.36342	16	0.719448	0.527679	Aromatic	EC1
0	99	G	1.26135	1.49022	1.37578	5	0.279475	0.203138	Small	EC1
0	99	H	1.52148	1.57708	1.54928	11	1.00853	0.650969	(+)	EC1
0	99	I	0.966068	1.04879	1.00743	12	0.636601	0.631908	Hydrophobic	EC1
0	99	K	0.843629	0.847836	0.845733	13	0.465388	0.550278	(+)	EC1
0	99	L	1.53227	1.58283	1.55755	14	0.763006	0.489876	Hydrophobic	EC1
0	99	M	0.906142	1.32232	1.11423	11	0.74778	0.671117	Hydrophobic	EC1
0	99	N	1.92612	2.48124	2.20368	9	1.35363	0.614257	Amide	EC1
0	99	P	1.22301	1.45791	1.34046	11	0.945594	0.705425	Proline	EC1
0	99	Q	1.0467	1.13297	1.08984	14	0.491413	0.450905	Amide	EC1
0	99	R	0.89767	1.00618	0.951923	11	0.513955	0.539913	(+)	EC1
0	99	S	0.823038	1.02707	0.925053	11	0.429516	0.464314	Nucleophilic	EC1
0	99	T	1.29493	1.39796	1.34644	12	0.730277	0.542376	Nucleophilic	EC1
0	99	V	0.704592	0.752986	0.728789	9	0.513834	0.705052	Hydrophobic	EC1
0	99	Y	0.890061	0.982059	0.93606	12	0.478086	0.510743	Aromatic	EC1
0	100	A	1.72701	1.73766	1.73234	16	0.999099	0.576735	Small	EC1
0	100	C	1.52615	1.6495	1.58782	11	0.747012	0.470462	Nucleophilic	EC1
0	100	D	1.81848	2.38357	2.10103	8	0.971072	0.46219	(-)	EC1
0	100	E	2.08288	2.5214	2.30214	14	2.14812	0.933097	(-)	EC1
0	100	F	1.65971	1.8122	1.73595	11	0.732102	0.42173	Aromatic	EC1
0	100	G	2.50171	2.55236	2.52704	11	1.35841	0.537551	Small	EC1
0	100	H	1.50861	2.40817	1.95839	15	2.14473	1.09515	(+)	EC1
0	100	I	1.431	1.58798	1.50949	16	0.522726	0.346293	Hydrophobic	EC1
0	100	K	2.18914	2.30437	2.24675	9	1.62494	0.723241	(+)	EC1
0	100	L	1.44683	1.49335	1.47009	15	0.608587	0.41398	Hydrophobic	EC1
0	100	M	1.46177	1.66278	1.56227	11	0.59964	0.383825	Hydrophobic	EC1
0	100	N	2.34012	2.57399	2.45706	12	1.20949	0.492252	Amide	EC1
0	100	P	2.62002	3.42084	3.02043	9	0.917543	0.303778	Proline	EC1
0	100	Q	2.01363	2.05963	2.03663	14	1.09897	0.539601	Amide	EC1
0	100	R	1.86984	3.47093	2.67038	8	2.05077	0.76797	(+)	EC1
0	100	S	1.61438	2.31253	1.96346	14	1.12567	0.573312	Nucleophilic	EC1
0	100	V	1.68854	1.75554	1.72204	8	0.891824	0.517887	Hydrophobic	EC1
0	100	W	1.05066	1.0898	1.07023	6	0.764757	0.714572	Aromatic	EC1
0	100	Y	1.44831	1.80917	1.62874	10	1.10625	0.679207	Aromatic	EC1
0	101	A	1.17988	1.41819	1.29904	10	0.778719	0.599458	Small	EC1
0	101	C	0.546198	0.826035	0.686117	7	0.662429	0.965476	Nucleophilic	EC1
0	101	D	1.24871	1.36029	1.3045	8	0.341759	0.261985	(-)	EC1
0	101	E	0.903858	1.25534	1.0796	12	0.61542	0.570045	(-)	EC1
0	101	G	2.15758	2.8602	2.50889	7	1.8188	0.724944	Small	EC1
0	101	H	1.77398	1.94336	1.85867	7	0.592947	0.319017	(+)	EC1
0	101	I	1.96588	1.96904	1.96746	17	1.71796	0.873188	Hydrophobic	EC1
0	101	K	1.26556	1.64385	1.4547	5	0.552702	0.379942	(+)	EC1
0	101	L	2.24073	3.10661	2.67367	13	1.5659	0.585673	Hydrophobic	EC1
0	101	M	1.34294	2.14748	1.74521	12	1.47341	0.844261	Hydrophobic	EC1
0	101	N	0.935649	1.19124	1.06345	8	0.971584	0.913619	Amide	EC1
0	101	P	1.17968	1.197	1.18834	13	0.60509	0.50919	Proline	EC1
0	101	Q	1.16348	1.4534	1.30844	15	0.628648	0.480457	Amide	EC1
0	101	R	1.10606	1.25797	1.18202	9	0.279197	0.236204	(+)	EC1
0	101	S	1.18594	1.61732	1.40163	11	0.553987	0.395243	Nucleophilic	EC1
0	101	T	1.12363	1.40621	1.26492	19	0.521407	0.412205	Nucleophilic	EC1
0	101	V	1.92269	1.93619	1.92944	18	1.08068	0.560101	Hydrophobic	EC1
0	101	W	1.41864	2.08635	1.75249	15	0.925852	0.528305	Aromatic	EC1
0	101	Y	1.79668	2.11311	1.9549	13	0.853077	0.43638	Aromatic	EC1
0	102	A	1.29665	1.52391	1.41028	14	0.613047	0.434699	Small	TM3
0	102	C	1.21296	1.24015	1.22655	11	0.37974	0.309599	Nucleophilic	TM3
0	102	D	1.30162	1.48937	1.3955	12	0.550186	0.394259	(-)	TM3
0	102	E	1.42049	1.53844	1.47947	7	0.568019	0.383935	(-)	TM3
0	102	F	1.43091	1.55132	1.49112	9	0.718316	0.481731	Aromatic	TM3
0	102	H	0.643164	0.655156	0.64916	5	0.427615	0.658721	(+)	TM3
0	102	I	1.00559	1.24064	1.12312	11	0.421613	0.375395	Hydrophobic	TM3
0	102	K	1.70072	1.83252	1.76662	7	0.797979	0.451697	(+)	TM3
0	102	L	1.15695	1.22128	1.18912	15	0.480593	0.40416	Hydrophobic	TM3
0	102	M	0.693706	0.825393	0.75955	6	0.424644	0.559073	Hydrophobic	TM3
0	102	N	1.60124	1.79943	1.70034	10	0.685974	0.403434	Amide	TM3
0	102	P	0.935021	1.55355	1.24429	12	0.860626	0.691662	Proline	TM3
0	102	Q	1.47303	1.607	1.54001	10	0.826806	0.536882	Amide	TM3
0	102	R	1.92146	2.06766	1.99456	10	1.43841	0.721169	(+)	TM3
0	102	S	1.24488	1.92753	1.58621	11	0.640656	0.403891	Nucleophilic	TM3
0	102	T	1.35916	1.61216	1.48566	17	0.966304	0.650422	Nucleophilic	TM3
0	102	V	1.20731	1.31323	1.26027	14	0.810786	0.643342	Hydrophobic	TM3
0	102	W	1.05998	1.12541	1.09269	9	0.582916	0.533467	Aromatic	TM3
0	102	Y	0.836172	1.01863	0.9274	9	0.556119	0.599654	Aromatic	TM3
0	103	A	1.86264	1.90621	1.88443	11	0.81257	0.431203	Small	TM3
0	103	C	1.7255	1.79205	1.75877	19	0.642015	0.365036	Nucleophilic	TM3
0	103	D	1.48537	1.65671	1.57104	13	1.30451	0.830348	(-)	TM3
0	103	E	1.66831	1.69801	1.68316	19	1.04897	0.623216	(-)	TM3
0	103	F	1.77441	1.97644	1.87543	15	0.72343	0.385741	Aromatic	TM3
0	103	G	0.859437	0.999146	0.929292	7	0.680414	0.732185	Small	TM3
0	103	H	1.10512	1.23629	1.1707	6	0.815441	0.69654	(+)	TM3
0	103	I	1.29681	1.34091	1.31886	6	0.937118	0.71055	Hydrophobic	TM3
0	103	K	1.13627	1.15477	1.14552	9	0.961947	0.839747	(+)	TM3
0	103	L	1.56508	1.93868	1.75188	11	0.858303	0.489932	Hydrophobic	TM3
0	103	M	1.67427	2.14009	1.90718	9	0.855873	0.448763	Hydrophobic	TM3
0	103	P	1.72376	2.16104	1.9424	11	1.15308	0.593637	Proline	TM3
0	103	Q	1.85447	1.86721	1.86084	10	0.945659	0.508191	Amide	TM3
0	103	R	2.24997	2.43786	2.34392	11	2.66359	1.13638	(+)	TM3
0	103	S	1.9885	2.03635	2.01243	13	1.19211	0.592375	Nucleophilic	TM3
0	103	T	1.70321	1.81322	1.75822	10	1.02046	0.580394	Nucleophilic	TM3
0	103	V	1.43739	1.71455	1.57597	16	0.903637	0.573384	Hydrophobic	TM3
0	103	W	1.2459	1.30299	1.27444	13	0.694367	0.54484	Aromatic	TM3
0	103	Y	1.70855	2.29794	2.00325	14	0.830863	0.414757	Aromatic	TM3
0	104	A	1.37221	1.80707	1.58964	6	0.610123	0.383812	Small	TM3
0	104	C	1.4715	1.76444	1.61797	13	0.636998	0.393702	Nucleophilic	TM3
0	104	D	1.55657	1.55847	1.55752	10	0.493176	0.316642	(-)	TM3
0	104	E	1.77956	2.19756	1.98856	13	0.658061	0.330923	(-)	TM3
0	104	G	1.55936	2.17618	1.86777	17	1.61565	0.865014	Small	TM3
0	104	H	1.24223	1.35467	1.29845	11	0.726133	0.559231	(+)	TM3
0	104	I	1.21716	1.54663	1.3819	16	0.568639	0.411492	Hydrophobic	TM3
0	104	K	1.42658	1.86271	1.64464	12	0.744554	0.452714	(+)	TM3
0	104	L	1.37036	1.59314	1.48175	9	0.430015	0.290207	Hydrophobic	TM3
0	104	M	1.16526	1.68649	1.42588	19	0.827424	0.580292	Hydrophobic	TM3
0	104	N	0.498226	0.661956	0.580091	3	0.454464	0.783437	Amide	TM3
0	104	P	0.800382	1.27616	1.03827	5	0.801519	0.771976	Proline	TM3
0	104	Q	1.40841	1.85082	1.62962	14	0.956596	0.587006	Amide	TM3
0	104	R	1.65897	2.17172	1.91534	18	0.929362	0.48522	(+)	TM3
0	104	S	0.986557	1.20614	1.09635	12	0.655231	0.59765	Nucleophilic	TM3
0	104	T	1.23291	1.383	1.30796	10	0.567163	0.433625	Nucleophilic	TM3
0	104	V	1.39994	1.51657	1.45826	17	0.624318	0.428126	Hydrophobic	TM3
0	104	W	0.790326	1.34081	1.06557	8	0.83092	0.77979	Aromatic	TM3
0	104	Y	1.6054	1.89779	1.7516	13	1.19079	0.679829	Aromatic	TM3
0	105	A	1.52071	1.99229	1.7565	8	0.643359	0.366273	Small	TM3
0	105	C	1.23671	1.25059	1.24365	18	0.451553	0.363087	Nucleophilic	TM3
0	105	D	0.954525	0.966349	0.960437	10	0.48288	0.502771	(-)	TM3
0	105	E	0.889294	1.10524	0.997267	12	0.498501	0.499867	(-)	TM3
0	105	F	1.055	1.27321	1.16411	4	0.795247	0.683139	Aromatic	TM3
0	105	G	1.9739	2.05153	2.01272	10	0.8741	0.434289	Small	TM3
0	105	H	1.23225	2.65176	1.94201	10	2.02908	1.04484	(+)	TM3
0	105	I	1.40694	1.92212	1.66453	16	1.01731	0.611166	Hydrophobic	TM3
0	105	K	1.17238	1.31685	1.24462	21	0.672542	0.540361	(+)	TM3
0	105	L	1.72538	1.98819	1.85678	12	1.04392	0.562217	Hydrophobic	TM3
0	105	M	1.57661	1.95485	1.76573	9	1.3066	0.739978	Hydrophobic	TM3
0	105	N	0.626408	1.04303	0.834722	7	0.451746	0.541194	Amide	TM3
0	105	P	1.09249	1.3091	1.20079	6	0.486981	0.405549	Proline	TM3
0	105	Q	0.994947	1.12888	1.06191	9	0.525155	0.494537	Amide	TM3
0	105	R	1.0413	1.23454	1.13792	15	0.589062	0.517663	(+)	TM3
0	105	S	1.15768	1.89088	1.52428	10	1.61141	1.05716	Nucleophilic	TM3
0	105	T	1.04222	1.0641	1.05316	14	0.707508	0.671796	Nucleophilic	TM3
0	105	V	1.55629	1.82883	1.69256	10	0.938754	0.554636	Hydrophobic	TM3
0	105	Y	1.75788	2.31568	2.03678	13	1.35682	0.666158	Aromatic	TM3
0	106	A	2.22798	2.77853	2.50326	16	3.5567	1.42083	Small	TM3
0	106	D	1.06665	1.07307	1.06986	7	0.413878	0.386853	(-)	TM3
0	106	E	1.45214	1.50713	1.47964	11	0.697238	0.471223	(-)	TM3
0	106	F	1.3951	1.61973	1.50742	8	0.44772	0.297012	Aromatic	TM3
0	106	G	1.74811	1.80086	1.77448	15	1.57507	0.887622	Small	TM3
0	106	H	1.52283	1.554	1.53841	5	0.578616	0.376112	(+)	TM3
0	106	I	1.1041	1.47372	1.28891	10	0.333489	0.258737	Hydrophobic	TM3
0	106	K	0.943525	1.10373	1.02363	10	0.42257	0.412817	(+)	TM3
0	106	L	1.38016	1.55897	1.46957	4	0.981434	0.66784	Hydrophobic	TM3
0	106	M	1.13197	1.4065	1.26923	8	0.623816	0.49149	Hydrophobic	TM3
0	106	N	1.11865	1.1904	1.15452	7	0.500554	0.433558	Amide	TM3
0	106	P	0.741006	0.862985	0.801995	18	0.448835	0.559648	Proline	TM3
0	106	Q	1.01997	1.39398	1.20698	8	0.639442	0.529789	Amide	TM3
0	106	R	0.980992	1.17008	1.07553	9	0.370042	0.344055	(+)	TM3
0	106	S	1.14078	1.2098	1.17529	15	0.543752	0.462654	Nucleophilic	TM3
0	106	T	0.892554	1.12506	1.00881	8	0.627256	0.62178	Nucleophilic	TM3
0	106	V	1.31556	1.83409	1.57482	9	0.554245	0.351941	Hydrophobic	TM3
0	106	W	1.60911	1.86936	1.73924	11	0.729007	0.419153	Aromatic	TM3
0	106	Y	0.933747	1.01644	0.975091	4	0.482107	0.494422	Aromatic	TM3
0	107	A	0.822813	1.30074	1.06178	18	0.67475	0.635492	Small	TM3
0	107	C	1.34963	1.73023	1.53993	22	0.612627	0.397828	Nucleophilic	TM3
0	107	D	1.5828	1.67109	1.62694	13	0.603274	0.370802	(-)	TM3
0	107	F	1.61654	1.80599	1.71127	22	0.872241	0.509706	Aromatic	TM3
0	107	G	1.74787	3.36883	2.55835	12	3.23441	1.26426	Small	TM3
0	107	H	1.18083	1.59273	1.38678	17	0.917415	0.661542	(+)	TM3
0	107	I	1.59798	1.73148	1.66473	20	1.38839	0.834	Hydrophobic	TM3
0	107	K	1.68664	1.75163	1.71913	13	0.903186	0.525373	(+)	TM3
0	107	L	0.988109	1.24497	1.11654	14	0.681801	0.610637	Hydrophobic	TM3
0	107	M	1.32503	1.61544	1.47024	10	0.723137	0.491851	Hydrophobic	TM3
0	107	N	0.978084	1.04149	1.00979	23	0.703948	0.697125	Amide	TM3
0	107	P	0.966166	1.14031	1.05324	22	0.501499	0.47615	Proline	TM3
[truncated: 29,213 more rows]
