# Supplementary material for: Structural and functional characterization of G protein–coupled receptors with deep mutational scanning
Source: eLife. 2020 Oct 21;9:e54895. doi: 10.7554/eLife.54895 (PMC7707821; doi:10.7554/eLife.54895)
Supplement: Supplementary file 3. — A table containing positions in the β2AR with their mutational tolerance, rank order, and an annotation for known positions in the receptor. [file elife-54895-supp3.xls]

## Sheet: SupplementaryTable3
Condition	Pos	Tolerance	Rank	Category
0	2	2.2211	399	NA
0	3	2.21741	397	NA
0	4	1.9879	337	NA
0	5	1.88777	285	NA
0	6	1.9705	329	NA
0	7	2.15557	388	NA
0	8	2.05204	366	NA
0	9	2.18501	392	NA
0	10	1.6416	155	NA
0	11	1.94026	314	NA
0	12	1.69331	180	NA
0	13	2.01073	350	NA
0	14	2.05314	368	NA
0	15	2.12512	385	NA
0	16	1.92229	304	NA
0	17	2.04974	362	NA
0	18	1.77359	222	NA
0	19	1.87671	279	NA
0	20	2.05022	363	NA
0	21	2.99822	412	NA
0	22	2.00074	341	NA
0	23	1.93185	312	NA
0	24	1.99862	340	NA
0	25	2.14564	387	NA
0	26	2.05161	365	NA
0	27	2.30375	406	NA
0	28	2.2439	403	NA
0	29	2.25561	404	NA
0	30	2.02589	354	NA
0	31	1.92684	307	NA
0	32	1.74793	209	NA
0	33	1.82187	246	NA
0	34	1.8667	273	NA
0	35	1.83708	255	NA
0	36	1.65734	164	NA
0	37	1.60831	136	NA
0	38	1.7264	198	NA
0	39	1.70346	185	NA
0	40	1.63429	152	NA
0	41	1.87311	276	NA
0	42	1.60571	135	NA
0	43	1.89164	286	NA
0	44	2.31	407	NA
0	45	1.72468	197	NA
0	46	1.8786	281	NA
0	47	1.76404	216	NA
0	48	1.6692	171	NA
0	49	1.85175	261	NA
0	50	2.08186	375	NA
0	51	1.20734	4	H2O Network
0	52	1.70502	187	NA
0	53	1.77978	229	NA
0	54	1.38493	51	NA
0	55	1.57753	128	NA
0	56	1.83504	252	NA
0	57	1.48697	96	NA
0	58	1.68058	175	NA
0	59	2.05067	364	NA
0	60	1.47282	88	NA
0	61	1.86316	270	NA
0	62	2.36472	408	NA
0	63	1.36375	42	NA
0	64	1.31074	25	NA
0	65	1.61383	141	NA
0	66	1.47799	92	NA
0	67	1.90642	292	NA
0	68	1.77927	228	H2O Network
0	69	1.41545	62	NA
0	70	1.66844	170	Cholesterol
0	71	1.38262	48	NA
0	72	1.4114	59	NA
0	73	1.82032	245	NA
0	74	1.43828	70	NA
0	75	1.25856	10	NA
0	76	1.3985	54	NA
0	77	1.58002	131	NA
0	78	1.32447	29	NA
0	79	1.21181	5	H2O Network
0	80	1.57098	120	NA
0	81	1.56828	116	NA
0	82	1.45594	79	NA
0	83	1.3382	33	NA
0	84	1.61263	140	NA
0	85	1.71152	192	NA
0	86	1.24201	8	NA
0	87	1.72256	196	NA
0	88	1.30553	23	NA
0	89	1.66811	169	NA
0	90	1.66629	167	NA
0	91	1.61519	142	NA
0	92	1.97578	331	NA
0	93	1.57702	126	NA
0	94	1.65694	163	NA
0	95	1.73767	203	NA
0	96	2.19431	396	NA
0	97	1.77719	227	NA
0	98	2.02762	355	NA
0	99	1.23724	7	NA
0	100	1.96328	326	NA
0	101	1.55913	113	NA
0	102	1.33273	32	NA
0	103	1.67199	172	NA
0	104	1.45774	80	NA
0	105	1.42897	67	NA
0	106	1.3493	36	Disulfide Bonds
0	107	1.57281	123	NA
0	108	1.37877	46	NA
0	109	1.57375	124	Orthosteric Site
0	110	1.62534	147	NA
0	111	1.46406	84	NA
0	112	1.59558	134	NA
0	113	1.3057	24	Orthosteric Site
0	114	1.29843	19	Orthosteric Site
0	115	1.60837	137	NA
0	116	1.62308	145	NA
0	117	1.35816	38	NA
0	118	1.39922	55	NA
0	119	1.36082	40	NA
0	120	1.45813	81	NA
0	121	1.33869	34	PIF
0	122	1.84975	259	NA
0	123	1.96115	324	NA
0	124	1.70385	186	H2O Network
0	125	1.7483	211	NA
0	126	1.52307	107	NA
0	127	1.40172	57	NA
0	128	1.37463	45	NA
0	129	1.4904	98	NA
0	130	1.79587	237	DRY Motif
0	131	1.57778	129	DRY Motif
0	132	1.57207	121	DRY Motif
0	133	1.92913	310	NA
0	134	2.17948	391	G-Alpha Interface
0	135	1.4785	93	G-Alpha Interface
0	136	1.81619	242	G-Alpha Interface
0	137	2.02763	356	NA
0	138	1.45082	77	G-Alpha Interface
0	139	1.48953	97	G-Alpha Interface
0	140	1.8116	241	G-Alpha Interface
0	141	1.48281	95	G-Alpha Interface
0	142	1.90965	295	G-Alpha Interface
0	143	2.11024	380	G-Alpha Interface
0	144	1.92769	308	NA
0	145	1.65428	162	NA
0	146	1.52466	109	NA
0	147	1.46663	86	NA
0	148	2.00424	344	NA
0	149	1.70999	189	NA
0	150	1.42924	68	NA
0	151	1.69143	179	Cholesterol
0	152	1.80069	239	NA
0	153	1.42054	63	NA
0	154	1.47427	90	Cholesterol
0	155	1.68242	176	NA
0	156	1.78348	231	NA
0	157	1.50651	105	NA
0	158	1.32417	28	Cholesterol
0	159	1.4638	83	NA
0	160	1.50618	104	NA
0	161	1.32573	30	NA
0	162	1.77439	224	NA
0	163	1.44634	73	NA
0	164	1.71345	195	NA
0	165	1.31098	26	NA
0	166	1.71144	191	NA
0	167	1.44158	71	NA
0	168	1.30477	21	NA
0	169	1.4143	60	NA
0	170	1.89342	288	NA
0	171	1.66659	168	NA
0	172	1.4933	100	NA
0	173	1.38809	52	NA
0	174	1.62073	144	NA
0	175	1.49181	99	NA
0	176	1.55077	112	NA
0	177	1.65241	160	NA
0	178	1.65243	161	NA
0	179	1.85936	267	NA
0	180	1.73979	205	NA
0	181	1.44938	75	NA
0	182	1.75579	214	NA
0	183	1.55952	114	NA
0	184	1.26467	12	Disulfide Bonds
0	185	1.38144	47	NA
0	186	1.76812	219	NA
0	187	1.91277	297	NA
0	188	1.85419	263	NA
0	189	1.82338	248	NA
0	190	1.2683	14	Disulfide Bonds
0	191	1.49785	103	Disulfide Bonds
0	192	1.44819	74	Orthosteric Site
0	193	1.33066	31	Orthosteric Site
0	194	1.63149	150	NA
0	195	1.96393	327	NA
0	196	1.53794	110	NA
0	197	1.82282	247	NA
0	198	1.79092	234	NA
0	199	1.35823	39	NA
0	200	1.7031	184	NA
0	201	1.65789	165	NA
0	202	1.86207	268	NA
0	203	1.40096	56	Orthosteric Site
0	204	1.42194	64	NA
0	205	1.62885	149	NA
0	206	1.73865	204	NA
0	207	1.51005	106	Orthosteric Site
0	208	1.28309	16	NA
0	209	1.5492	111	NA
0	210	1.58893	133	NA
0	211	1.08168	1	PIF
0	212	1.81883	243	NA
0	213	1.8503	260	NA
0	214	1.57232	122	NA
0	215	1.29544	17	NA
0	216	1.57863	130	NA
0	217	1.74802	210	NA
0	218	1.73024	200	NA
0	219	1.29589	18	DRY Motif
0	220	2.22455	400	NA
0	221	1.46592	85	NA
0	222	1.37402	44	G-Alpha Interface
0	223	1.85685	265	NA
0	224	1.76807	218	NA
0	225	1.64536	156	G-Alpha Interface
0	226	1.66558	166	G-Alpha Interface
0	227	2.00807	347	NA
0	228	2.02587	353	NA
0	229	1.63408	151	G-Alpha Interface
0	230	1.73209	202	G-Alpha Interface
0	231	1.71092	190	NA
0	232	1.74118	206	G-Alpha Interface
0	233	1.44305	72	G-Alpha Interface
0	234	2.21942	398	NA
0	235	1.79503	235	NA
0	236	1.70275	183	G-Alpha Interface
0	237	1.8074	240	NA
0	238	1.84839	258	NA
0	239	1.47367	89	G-Alpha Interface
0	240	1.62655	148	NA
0	241	1.87874	282	NA
0	242	2.05552	369	NA
0	243	2.1194	384	NA
0	244	2.08945	376	NA
0	245	1.76317	215	NA
0	246	1.72969	199	NA
0	247	1.69414	181	NA
0	248	2.04856	361	NA
0	249	1.9488	319	NA
0	250	1.92032	302	NA
0	251	2.04315	359	NA
0	252	1.89864	290	NA
0	253	1.74861	212	NA
0	254	2.1934	395	NA
0	255	2.1885	394	NA
0	256	1.79083	233	NA
0	257	2.37218	409	NA
0	258	1.8449	257	NA
0	259	1.60882	138	NA
0	260	2.06951	372	NA
0	261	1.91369	298	NA
0	262	2.18765	393	NA
0	263	1.77086	220	NA
0	264	1.74872	213	NA
0	265	1.97753	334	NA
0	266	1.85697	266	NA
0	267	1.71282	193	NA
0	268	2.0479	360	DRY Motif
0	269	1.90122	291	NA
0	270	1.57678	125	NA
0	271	1.40314	58	G-Alpha Interface
0	272	1.94901	320	NA
0	273	1.67865	174	NA
0	274	2.00973	348	G-Alpha Interface
0	275	1.47943	94	G-Alpha Interface
0	276	1.8877	284	NA
0	277	1.77543	225	NA
0	278	1.82836	249	H2O Network
0	279	1.47539	91	NA
0	280	1.42757	66	NA
0	281	1.58241	132	NA
0	282	1.57717	127	PIF
0	283	1.6963	182	NA
0	284	1.44965	76	NA
0	285	1.4601	82	CWxP
0	286	1.18152	2	CWxP
0	287	1.71285	194	NA
0	288	1.2716	15	NA
0	289	1.20495	3	Orthosteric Site
0	290	1.25816	9	Orthosteric Site
0	291	1.45085	78	NA
0	292	1.43022	69	NA
0	293	1.46866	87	Orthosteric Site
0	294	1.38479	50	NA
0	295	1.74365	207	NA
0	296	1.94667	316	NA
0	297	1.74555	208	NA
0	298	1.92423	305	NA
0	299	1.77616	226	NA
0	300	1.94983	321	NA
0	301	1.6474	158	NA
0	302	1.86375	271	NA
0	303	1.36338	41	NA
0	304	1.97695	333	NA
0	305	1.62406	146	NA
0	306	1.56868	117	NA
0	307	1.91629	299	NA
0	308	1.2622	11	NA
0	309	1.67507	173	Orthosteric Site
0	310	1.68512	178	NA
0	311	1.57057	119	H2O Network
0	312	1.37341	43	Orthosteric Site
0	313	1.42558	65	NA
0	314	1.61171	139	NA
0	315	1.22488	6	NA
0	316	1.26798	13	NA
0	317	1.65071	159	NA
0	318	1.4145	61	H2O Network
0	319	1.30508	22	NA
0	320	1.49524	101	NA
0	321	1.38271	49	NA
0	322	1.3519	37	NPxxY
0	323	1.39251	53	NPxxY
0	324	1.64615	157	NA
0	325	1.34678	35	NA
0	326	1.32368	27	NPxxY
0	327	2.16671	390	NA
0	328	1.49594	102	NA
0	329	1.61589	143	NA
0	330	2.15627	389	NA
0	331	1.63757	153	NA
0	332	1.30473	20	NA
0	333	2.22883	401	NA
0	334	1.90768	294	NA
0	335	1.57039	118	NA
0	336	1.52315	108	NA
0	337	1.73044	201	NA
0	338	1.68357	177	NA
0	339	1.56815	115	NA
0	340	1.63934	154	NA
0	341	1.95171	322	NA
0	342	1.94745	317	NA
0	343	1.79848	238	NA
0	344	1.83624	253	NA
0	345	2.01013	349	NA
0	346	1.86638	272	NA
0	347	1.97198	330	NA
0	348	1.92816	309	NA
0	349	2.00228	342	NA
0	350	1.88324	283	NA
0	351	2.28769	405	NA
0	352	1.87677	280	NA
0	353	1.86675	274	NA
0	354	2.06698	371	NA
0	355	1.95262	323	NA
0	356	1.8761	278	NA
0	357	1.83697	254	NA
0	358	1.78951	232	NA
0	359	1.82848	250	NA
0	360	1.94871	318	NA
0	361	1.91011	296	NA
0	362	1.86239	269	NA
0	363	1.94611	315	NA
0	364	2.00672	346	NA
0	365	1.83842	256	NA
0	366	1.96763	328	NA
0	367	1.91715	301	NA
0	368	1.99547	339	NA
0	369	1.77169	221	NA
0	370	2.11579	381	NA
0	371	2.00509	345	NA
0	372	1.98902	338	NA
0	373	1.93714	313	NA
0	374	2.10016	379	NA
0	375	1.89552	289	NA
0	376	1.9247	306	NA
0	377	2.24185	402	NA
0	378	1.97981	336	NA
0	379	2.13828	386	NA
0	380	2.01965	351	NA
0	381	2.03334	358	NA
0	382	2.07428	373	NA
0	383	1.97578	332	NA
0	384	1.70745	188	NA
0	385	2.1165	382	NA
0	386	1.85244	262	NA
0	387	1.92203	303	NA
0	388	1.76439	217	NA
0	389	2.11666	383	NA
0	390	1.79522	236	NA
0	391	1.917	300	NA
0	392	1.90671	293	NA
0	393	2.09295	377	NA
0	394	1.87223	275	NA
0	395	1.89187	287	NA
0	396	1.97949	335	NA
0	397	1.9612	325	NA
0	398	1.85548	264	NA
0	399	1.82929	251	NA
0	400	1.93124	311	NA
0	401	1.81984	244	NA
0	402	2.02153	352	NA
0	403	1.77408	223	NA
0	404	1.7801	230	NA
0	405	2.05757	370	NA
0	406	2.03319	357	NA
0	407	2.05304	367	NA
0	408	1.87311	277	NA
0	409	2.37457	410	NA
0	410	2.00241	343	NA
0	411	2.09321	378	NA
0	412	2.07946	374	NA
0	413	2.74011	411	NA
0.15	2	2.61316	410	NA
0.15	3	2.39945	391	NA
0.15	4	2.12064	306	NA
0.15	5	2.252	357	NA
0.15	6	2.2689	364	NA
0.15	7	2.22747	347	NA
0.15	8	2.4113	395	NA
0.15	9	2.40972	393	NA
0.15	10	1.71497	139	NA
0.15	11	2.30224	370	NA
0.15	12	1.89575	206	NA
0.15	13	1.9588	225	NA
0.15	14	2.1974	340	NA
0.15	15	2.3965	389	NA
0.15	16	2.31963	376	NA
0.15	17	2.11496	302	NA
0.15	18	2.12366	308	NA
0.15	19	2.04293	265	NA
0.15	20	2.1765	328	NA
0.15	21	2.40368	392	NA
0.15	22	2.51142	405	NA
0.15	23	2.19358	337	NA
0.15	24	2.41765	397	NA
0.15	25	2.16832	326	NA
0.15	26	2.44322	400	NA
0.15	27	2.53171	406	NA
0.15	28	2.41155	396	NA
0.15	29	2.49915	403	NA
0.15	30	2.09805	293	NA
0.15	31	2.38311	386	NA
0.15	32	1.9314	218	NA
0.15	33	2.06139	273	NA
0.15	34	2.05702	270	NA
0.15	35	1.9518	223	NA
0.15	36	1.7178	143	NA
0.15	37	1.73879	150	NA
0.15	38	1.83873	186	NA
0.15	39	1.90422	210	NA
0.15	40	1.74483	153	NA
0.15	41	2.07562	282	NA
0.15	42	1.6268	113	NA
0.15	43	1.85812	192	NA
0.15	44	2.55897	409	NA
0.15	45	1.8659	196	NA
0.15	46	2.09051	289	NA
0.15	47	1.7095	138	NA
0.15	48	1.86069	193	NA
0.15	49	2.0795	287	NA
0.15	50	2.22905	348	NA
0.15	51	1.28214	13	H2O Network
0.15	52	1.82313	181	NA
0.15	53	1.72974	148	NA
0.15	54	1.40761	47	NA
0.15	55	1.57015	98	NA
0.15	56	2.01756	252	NA
0.15	57	1.59453	104	NA
0.15	58	1.8275	183	NA
0.15	59	2.15742	322	NA
0.15	60	1.45465	62	NA
0.15	61	2.01678	250	NA
0.15	62	2.64453	411	NA
0.15	63	1.51936	79	NA
0.15	64	1.3686	35	NA
0.15	65	1.75113	156	NA
0.15	66	1.59833	105	NA
0.15	67	2.06024	272	NA
0.15	68	2.05829	271	H2O Network
0.15	69	1.42789	55	NA
0.15	70	1.76903	161	Cholesterol
0.15	71	1.37144	38	NA
0.15	72	1.46299	66	NA
0.15	73	2.10748	297	NA
0.15	74	1.45653	65	NA
0.15	75	1.36616	34	NA
0.15	76	1.41113	49	NA
0.15	77	1.56437	97	NA
0.15	78	1.36342	33	NA
0.15	79	1.24063	11	H2O Network
0.15	80	1.61516	110	NA
0.15	81	1.7567	157	NA
0.15	82	1.45625	63	NA
0.15	83	1.2979	20	NA
0.15	84	1.54892	90	NA
0.15	85	1.7255	146	NA
0.15	86	1.29781	19	NA
0.15	87	1.66543	125	NA
0.15	88	1.21404	7	NA
0.15	89	1.68732	131	NA
0.15	90	1.66901	127	NA
0.15	91	1.68371	130	NA
0.15	92	2.14406	317	NA
0.15	93	1.79706	172	NA
0.15	94	1.96021	228	NA
0.15	95	1.76909	162	NA
0.15	96	2.38107	385	NA
0.15	97	1.90701	212	NA
0.15	98	2.26055	360	NA
0.15	99	1.16344	2	NA
0.15	100	2.11997	305	NA
0.15	101	1.45638	64	NA
0.15	102	1.42104	52	NA
0.15	103	1.81154	176	NA
0.15	104	1.68061	129	NA
0.15	105	1.62819	114	NA
0.15	106	1.30228	23	Disulfide Bonds
0.15	107	1.74976	154	NA
0.15	108	1.47723	69	NA
0.15	109	1.65281	123	Orthosteric Site
0.15	110	1.97693	237	NA
0.15	111	1.51005	76	NA
0.15	112	1.64419	117	NA
0.15	113	1.26324	12	Orthosteric Site
0.15	114	1.29271	17	Orthosteric Site
0.15	115	1.57838	100	NA
0.15	116	1.64532	119	NA
0.15	117	1.39417	45	NA
0.15	118	1.2991	22	NA
0.15	119	1.38496	42	NA
0.15	120	1.39312	44	NA
0.15	121	1.3706	36	PIF
0.15	122	2.1925	336	NA
0.15	123	1.77475	164	NA
0.15	124	1.69216	133	H2O Network
0.15	125	1.80593	175	NA
0.15	126	1.55635	94	NA
0.15	127	1.32018	27	NA
0.15	128	1.45143	59	NA
0.15	129	1.60827	109	NA
0.15	130	2.00218	245	DRY Motif
0.15	131	1.49995	72	DRY Motif
0.15	132	1.63444	115	DRY Motif
0.15	133	1.97508	236	NA
0.15	134	2.24624	354	G-Alpha Interface
0.15	135	1.50584	75	G-Alpha Interface
0.15	136	1.96029	229	G-Alpha Interface
0.15	137	2.30428	371	NA
0.15	138	1.45358	61	G-Alpha Interface
0.15	139	1.57108	99	G-Alpha Interface
0.15	140	2.13849	313	G-Alpha Interface
0.15	141	1.61753	111	G-Alpha Interface
0.15	142	2.07932	286	G-Alpha Interface
0.15	143	2.37147	384	G-Alpha Interface
0.15	144	2.07166	280	NA
0.15	145	1.81544	177	NA
0.15	146	1.5599	96	NA
0.15	147	1.78074	165	NA
0.15	148	2.18855	335	NA
0.15	149	1.9597	227	NA
0.15	150	1.47561	68	NA
0.15	151	1.96685	232	Cholesterol
0.15	152	2.21263	343	NA
0.15	153	1.54472	88	NA
0.15	154	1.48116	70	Cholesterol
0.15	155	1.78848	167	NA
0.15	156	1.9928	242	NA
0.15	157	1.45254	60	NA
0.15	158	1.23912	10	Cholesterol
0.15	159	1.50135	73	NA
0.15	160	1.5532	92	NA
0.15	161	1.32877	30	NA
0.15	162	1.84949	190	NA
0.15	163	1.58572	101	NA
0.15	164	1.73431	149	NA
0.15	165	1.30876	24	NA
0.15	166	1.74027	152	NA
0.15	167	1.52835	83	NA
0.15	168	1.29577	18	NA
0.15	169	1.43091	56	NA
0.15	170	1.89975	208	NA
0.15	171	1.75102	155	NA
0.15	172	1.8239	182	NA
0.15	173	1.42683	54	NA
0.15	174	1.6949	134	NA
0.15	175	1.77019	163	NA
0.15	176	1.64584	120	NA
0.15	177	1.89556	205	NA
0.15	178	1.75675	158	NA
0.15	179	2.08586	288	NA
0.15	180	2.01743	251	NA
0.15	181	1.33735	32	NA
0.15	182	2.06935	279	NA
0.15	183	1.81799	178	NA
0.15	184	1.28633	14	Disulfide Bonds
0.15	185	1.44001	58	NA
0.15	186	2.03122	257	NA
0.15	187	2.03417	259	NA
0.15	188	1.922	215	NA
0.15	189	1.88724	202	NA
0.15	190	1.28726	15	Disulfide Bonds
0.15	191	1.29117	16	Disulfide Bonds
0.15	192	1.71592	141	Orthosteric Site
0.15	193	1.40106	46	Orthosteric Site
0.15	194	1.823	180	NA
0.15	195	1.95925	226	NA
0.15	196	1.66351	124	NA
0.15	197	2.07918	285	NA
0.15	198	2.05498	269	NA
0.15	199	1.41514	50	NA
0.15	200	1.79516	170	NA
0.15	201	1.83879	187	NA
0.15	202	2.02325	255	NA
0.15	203	1.31644	25	Orthosteric Site
0.15	204	1.3875	43	NA
0.15	205	1.87668	199	NA
0.15	206	1.84891	189	NA
0.15	207	1.54654	89	Orthosteric Site
0.15	208	1.29891	21	NA
0.15	209	1.61804	112	NA
0.15	210	1.7232	145	NA
0.15	211	0.980255	1	PIF
0.15	212	1.8608	194	NA
0.15	213	2.0366	260	NA
0.15	214	1.5209	81	NA
0.15	215	1.37648	41	NA
0.15	216	1.70464	136	NA
0.15	217	1.72119	144	NA
0.15	218	1.79538	171	NA
0.15	219	1.333	31	DRY Motif
0.15	220	2.02054	253	NA
0.15	221	1.59279	103	NA
0.15	222	1.4216	53	G-Alpha Interface
0.15	223	1.72671	147	NA
0.15	224	2.03356	258	NA
0.15	225	1.88373	200	G-Alpha Interface
0.15	226	1.59935	106	G-Alpha Interface
0.15	227	2.1741	327	NA
0.15	228	2.33449	377	NA
0.15	229	1.58965	102	G-Alpha Interface
0.15	230	1.96446	231	G-Alpha Interface
0.15	231	2.15462	320	NA
0.15	232	1.86461	195	G-Alpha Interface
0.15	233	1.7157	140	G-Alpha Interface
0.15	234	2.55712	408	NA
0.15	235	1.89071	204	NA
0.15	236	1.83247	184	G-Alpha Interface
0.15	237	1.90649	211	NA
0.15	238	1.99174	241	NA
0.15	239	1.70784	137	G-Alpha Interface
0.15	240	1.78522	166	NA
0.15	241	1.92409	217	NA
0.15	242	2.10358	295	NA
0.15	243	2.23768	349	NA
0.15	244	2.12986	309	NA
0.15	245	2.0542	268	NA
0.15	246	1.95074	222	NA
0.15	247	1.91734	214	NA
0.15	248	2.28823	366	NA
0.15	249	2.23805	350	NA
0.15	250	2.11852	304	NA
0.15	251	2.31869	375	NA
0.15	252	2.13763	312	NA
0.15	253	2.0657	274	NA
0.15	254	2.26128	362	NA
0.15	255	2.3351	378	NA
0.15	256	2.03844	263	NA
0.15	257	2.49892	402	NA
0.15	258	2.19723	339	NA
0.15	259	1.96995	233	NA
0.15	260	2.41035	394	NA
0.15	261	2.17961	330	NA
0.15	262	2.50069	404	NA
0.15	263	1.9886	239	NA
0.15	264	1.86977	197	NA
0.15	265	2.14005	315	NA
0.15	266	1.92273	216	NA
0.15	267	2.02209	254	NA
0.15	268	2.25125	356	DRY Motif
0.15	269	2.10566	296	NA
0.15	270	1.67017	128	NA
0.15	271	1.4101	48	G-Alpha Interface
0.15	272	1.99573	243	NA
0.15	273	1.93469	219	NA
0.15	274	2.11046	299	G-Alpha Interface
0.15	275	1.51458	78	G-Alpha Interface
0.15	276	2.06714	276	NA
0.15	277	1.9415	220	NA
0.15	278	1.9626	230	H2O Network
0.15	279	1.71736	142	NA
0.15	280	1.54956	91	NA
0.15	281	1.64474	118	NA
0.15	282	1.49215	71	PIF
0.15	283	1.83658	185	NA
0.15	284	1.52899	84	NA
0.15	285	1.51972	80	CWxP
0.15	286	1.18462	5	CWxP
0.15	287	1.767	160	NA
0.15	288	1.23217	9	NA
0.15	289	1.22288	8	Orthosteric Site
0.15	290	1.47166	67	Orthosteric Site
0.15	291	1.69589	135	NA
0.15	292	1.55475	93	NA
0.15	293	1.60357	108	Orthosteric Site
0.15	294	1.53973	85	NA
0.15	295	1.88989	203	NA
0.15	296	2.07532	281	NA
0.15	297	1.97013	234	NA
0.15	298	2.15521	321	NA
0.15	299	2.03797	262	NA
0.15	300	1.89683	207	NA
0.15	301	1.87103	198	NA
0.15	302	2.00815	246	NA
0.15	303	1.5259	82	NA
0.15	304	2.07722	283	NA
0.15	305	1.73946	151	NA
0.15	306	1.55822	95	NA
0.15	307	2.09902	294	NA
0.15	308	1.50283	74	NA
0.15	309	1.84114	188	Orthosteric Site
0.15	310	2.00822	247	NA
0.15	311	1.5425	86	H2O Network
0.15	312	1.37083	37	Orthosteric Site
0.15	313	1.51056	77	NA
0.15	314	1.7946	169	NA
0.15	315	1.17888	3	NA
0.15	316	1.21178	6	NA
0.15	317	1.76598	159	NA
0.15	318	1.43855	57	H2O Network
0.15	319	1.31941	26	NA
0.15	320	1.63691	116	NA
0.15	321	1.37635	40	NA
0.15	322	1.32421	28	NPxxY
0.15	323	1.37574	39	NPxxY
0.15	324	1.80232	174	NA
0.15	325	1.32464	29	NA
0.15	326	1.18007	4	NPxxY
0.15	327	1.99855	244	NA
0.15	328	1.68971	132	NA
0.15	329	1.54301	87	NA
0.15	330	2.49843	401	NA
0.15	331	1.8203	179	NA
0.15	332	1.41661	51	NA
0.15	333	2.25696	358	NA
0.15	334	1.94843	221	NA
0.15	335	1.6503	122	NA
0.15	336	1.59983	107	NA
0.15	337	1.79342	168	NA
0.15	338	1.79934	173	NA
0.15	339	1.65017	121	NA
0.15	340	1.85574	191	NA
0.15	341	2.13498	311	NA
0.15	342	2.06825	277	NA
0.15	343	2.01306	249	NA
0.15	344	2.04928	267	NA
0.15	345	2.1807	331	NA
0.15	346	2.24236	353	NA
0.15	347	2.3858	387	NA
0.15	348	2.11662	303	NA
0.15	349	2.24067	351	NA
0.15	350	2.26239	363	NA
0.15	351	2.3642	383	NA
0.15	352	2.31503	373	NA
0.15	353	2.20118	341	NA
0.15	354	2.16199	323	NA
0.15	355	2.21457	344	NA
0.15	356	2.06611	275	NA
0.15	357	2.02793	256	NA
0.15	358	2.0924	290	NA
0.15	359	2.1468	319	NA
0.15	360	1.97283	235	NA
0.15	361	2.27145	365	NA
0.15	362	2.03989	264	NA
0.15	363	2.35607	381	NA
0.15	364	2.35812	382	NA
0.15	365	2.16354	324	NA
0.15	366	2.30559	372	NA
0.15	367	2.25775	359	NA
0.15	368	2.04809	266	NA
0.15	369	1.97993	238	NA
0.15	370	2.24797	355	NA
0.15	371	2.20684	342	NA
0.15	372	1.91413	213	NA
0.15	373	2.31604	374	NA
0.15	374	2.18598	334	NA
0.15	375	2.18219	332	NA
0.15	376	2.16642	325	NA
0.15	377	2.26115	361	NA
0.15	378	2.09594	292	NA
0.15	379	2.4185	398	NA
0.15	380	2.29017	368	NA
0.15	381	2.11411	301	NA
0.15	382	2.18591	333	NA
0.15	383	2.24205	352	NA
0.15	384	1.66715	126	NA
0.15	385	2.2918	369	NA
0.15	386	2.0778	284	NA
0.15	387	2.093	291	NA
0.15	388	2.03674	261	NA
0.15	389	2.22309	346	NA
0.15	390	1.98967	240	NA
0.15	391	2.14216	316	NA
0.15	392	2.11166	300	NA
0.15	393	2.14558	318	NA
0.15	394	2.13877	314	NA
0.15	395	2.12124	307	NA
0.15	396	2.3377	379	NA
0.15	397	2.1787	329	NA
0.15	398	2.00843	248	NA
0.15	399	2.22107	345	NA
0.15	400	2.3426	380	NA
0.15	401	1.90262	209	NA
0.15	402	2.38685	388	NA
0.15	403	1.88699	201	NA
0.15	404	2.10756	298	NA
0.15	405	2.06848	278	NA
0.15	406	2.1962	338	NA
0.15	407	2.42008	399	NA
0.15	408	2.1332	310	NA
0.15	409	2.55256	407	NA
0.15	410	2.28883	367	NA
0.15	411	2.39699	390	NA
0.15	412	1.95553	224	NA
0.15	413	3.31414	412	NA
0.625	2	2.43788	369	NA
0.625	3	2.53166	390	NA
0.625	4	2.25337	311	NA
0.625	5	2.29696	327	NA
0.625	6	2.37539	346	NA
0.625	7	2.68742	403	NA
0.625	8	2.44367	372	NA
0.625	9	2.55763	393	NA
0.625	10	1.90419	185	NA
0.625	11	2.27654	320	NA
0.625	12	2.06761	233	NA
0.625	13	2.14964	261	NA
0.625	14	2.35954	343	NA
0.625	15	2.47901	379	NA
0.625	16	2.31926	333	NA
0.625	17	2.23966	306	NA
0.625	18	2.26123	316	NA
0.625	19	2.20816	286	NA
0.625	20	2.18336	277	NA
0.625	21	2.778	408	NA
0.625	22	2.63016	401	NA
0.625	23	2.23427	302	NA
0.625	24	2.20554	283	NA
0.625	25	2.53434	391	NA
0.625	26	2.85305	410	NA
0.625	27	2.62417	399	NA
0.625	28	2.5981	397	NA
0.625	29	2.69055	404	NA
0.625	30	2.31623	332	NA
0.625	31	2.48141	381	NA
0.625	32	1.93113	188	NA
0.625	33	1.99206	210	NA
0.625	34	1.90256	183	NA
0.625	35	2.04216	223	NA
0.625	36	1.94119	191	NA
0.625	37	2.0365	221	NA
0.625	38	1.63535	105	NA
0.625	39	1.78439	153	NA
0.625	40	1.78752	156	NA
0.625	41	2.10989	245	NA
0.625	42	1.69659	126	NA
0.625	43	1.95597	198	NA
0.625	44	2.51907	388	NA
0.625	45	2.11857	251	NA
0.625	46	2.21352	291	NA
0.625	47	1.74997	142	NA
0.625	48	1.85363	172	NA
0.625	49	1.99768	213	NA
0.625	50	2.16639	268	NA
0.625	51	1.16189	5	H2O Network
0.625	52	1.73917	139	NA
0.625	53	1.77133	151	NA
0.625	54	1.32217	35	NA
0.625	55	1.57995	91	NA
0.625	56	2.11139	247	NA
0.625	57	1.60733	97	NA
0.625	58	1.86157	176	NA
0.625	59	2.4236	364	NA
0.625	60	1.38569	49	NA
0.625	61	2.25434	312	NA
0.625	62	2.43196	367	NA
0.625	63	1.56324	84	NA
0.625	64	1.41538	52	NA
0.625	65	1.79947	158	NA
0.625	66	1.70398	130	NA
0.625	67	2.21892	297	NA
0.625	68	1.85541	173	H2O Network
0.625	69	1.55894	83	NA
0.625	70	1.98506	209	Cholesterol
0.625	71	1.29864	32	NA
0.625	72	1.49861	70	NA
0.625	73	2.16897	270	NA
0.625	74	1.40645	51	NA
0.625	75	1.27415	26	NA
0.625	76	1.34618	41	NA
0.625	77	1.50586	73	NA
0.625	78	1.33371	37	NA
0.625	79	1.21487	15	H2O Network
0.625	80	1.68216	122	NA
0.625	81	1.75591	145	NA
0.625	82	1.43108	55	NA
0.625	83	1.18651	10	NA
0.625	84	1.65331	115	NA
0.625	85	1.71383	134	NA
0.625	86	1.26883	24	NA
0.625	87	1.58979	94	NA
0.625	88	1.23028	17	NA
0.625	89	1.80596	160	NA
0.625	90	1.7851	154	NA
0.625	91	1.70098	129	NA
0.625	92	2.24647	308	NA
0.625	93	1.90712	187	NA
0.625	94	2.11448	249	NA
0.625	95	1.81182	161	NA
0.625	96	2.69792	405	NA
0.625	97	1.95621	199	NA
0.625	98	2.45198	375	NA
0.625	99	1.20681	13	NA
0.625	100	2.16322	267	NA
0.625	101	1.49814	69	NA
0.625	102	1.30602	34	NA
0.625	103	1.97695	206	NA
0.625	104	1.96888	205	NA
0.625	105	1.46322	62	NA
0.625	106	1.25412	21	Disulfide Bonds
0.625	107	1.74119	140	NA
0.625	108	1.47377	66	NA
0.625	109	1.71005	132	Orthosteric Site
0.625	110	2.12084	253	NA
0.625	111	1.57148	86	NA
0.625	112	1.82735	165	NA
0.625	113	1.17165	7	Orthosteric Site
0.625	114	1.27486	27	Orthosteric Site
0.625	115	1.64433	109	NA
0.625	116	1.57332	88	NA
0.625	117	1.39282	50	NA
0.625	118	1.29776	31	NA
0.625	119	1.41608	53	NA
0.625	120	1.44912	60	NA
0.625	121	1.33385	38	PIF
0.625	122	2.23448	303	NA
0.625	123	1.75866	147	NA
0.625	124	1.65372	117	H2O Network
0.625	125	1.77999	152	NA
0.625	126	1.50788	74	NA
0.625	127	1.36398	46	NA
0.625	128	1.38523	48	NA
0.625	129	1.57153	87	NA
0.625	130	1.89196	181	DRY Motif
0.625	131	1.64815	112	DRY Motif
0.625	132	1.64696	110	DRY Motif
0.625	133	2.10237	242	NA
0.625	134	2.2146	292	G-Alpha Interface
0.625	135	1.48007	68	G-Alpha Interface
0.625	136	2.03336	220	G-Alpha Interface
0.625	137	2.33875	340	NA
0.625	138	1.56603	85	G-Alpha Interface
0.625	139	1.64174	108	G-Alpha Interface
0.625	140	2.17423	274	G-Alpha Interface
0.625	141	1.62349	101	G-Alpha Interface
0.625	142	2.02486	217	G-Alpha Interface
0.625	143	2.42423	365	G-Alpha Interface
0.625	144	2.15902	266	NA
0.625	145	1.81473	162	NA
0.625	146	1.5772	90	NA
0.625	147	1.79579	157	NA
0.625	148	2.20576	284	NA
0.625	149	1.99742	212	NA
0.625	150	1.36653	47	NA
0.625	151	2.05354	225	Cholesterol
0.625	152	2.02935	219	NA
0.625	153	1.55149	79	NA
0.625	154	1.49918	71	Cholesterol
0.625	155	1.90394	184	NA
0.625	156	1.95858	200	NA
0.625	157	1.45043	61	NA
0.625	158	1.18621	9	Cholesterol
0.625	159	1.66824	119	NA
0.625	160	1.63926	106	NA
0.625	161	1.25367	20	NA
0.625	162	1.83164	168	NA
0.625	163	1.52819	77	NA
0.625	164	1.70439	131	NA
0.625	165	1.27757	28	NA
0.625	166	1.76607	150	NA
0.625	167	1.50888	75	NA
0.625	168	1.22004	16	NA
0.625	169	1.43805	58	NA
0.625	170	2.11646	250	NA
0.625	171	1.85861	175	NA
0.625	172	1.73453	137	NA
0.625	173	1.47971	67	NA
0.625	174	1.83366	169	NA
0.625	175	1.80421	159	NA
0.625	176	1.74928	141	NA
0.625	177	1.943	193	NA
0.625	178	1.82862	166	NA
0.625	179	2.12403	254	NA
0.625	180	1.94401	195	NA
0.625	181	1.34053	40	NA
0.625	182	1.9376	190	NA
0.625	183	1.99257	211	NA
0.625	184	1.19885	12	Disulfide Bonds
0.625	185	1.47144	65	NA
0.625	186	2.17024	271	NA
0.625	187	2.20071	281	NA
0.625	188	2.0186	216	NA
0.625	189	2.21055	289	NA
0.625	190	1.18924	11	Disulfide Bonds
0.625	191	1.20858	14	Disulfide Bonds
0.625	192	1.82293	164	Orthosteric Site
0.625	193	1.46728	63	Orthosteric Site
0.625	194	2.03743	222	NA
0.625	195	2.0275	218	NA
0.625	196	1.64743	111	NA
0.625	197	2.21177	290	NA
0.625	198	2.21659	294	NA
0.625	199	1.33367	36	NA
0.625	200	1.68828	124	NA
0.625	201	1.94386	194	NA
0.625	202	2.05748	229	NA
0.625	203	1.26604	23	Orthosteric Site
0.625	204	1.30467	33	NA
0.625	205	2.11118	246	NA
0.625	206	1.88708	180	NA
0.625	207	1.42585	54	Orthosteric Site
0.625	208	1.29389	30	NA
0.625	209	1.61388	99	NA
0.625	210	2.05392	226	NA
0.625	211	1.0286	1	PIF
0.625	212	1.83023	167	NA
0.625	213	2.12045	252	NA
0.625	214	1.75769	146	NA
0.625	215	1.28206	29	NA
0.625	216	1.7511	143	NA
0.625	217	1.9457	196	NA
0.625	218	2.05549	227	NA
0.625	219	1.43835	59	DRY Motif
0.625	220	2.56169	395	NA
0.625	221	1.69686	127	NA
0.625	222	1.50152	72	G-Alpha Interface
0.625	223	1.89999	182	NA
0.625	224	2.1802	276	NA
0.625	225	1.94776	197	G-Alpha Interface
0.625	226	1.65349	116	G-Alpha Interface
0.625	227	1.98255	208	NA
0.625	228	2.38207	349	NA
0.625	229	1.55403	81	G-Alpha Interface
0.625	230	2.07396	236	G-Alpha Interface
0.625	231	2.08805	241	NA
0.625	232	2.08752	240	G-Alpha Interface
0.625	233	1.55879	82	G-Alpha Interface
0.625	234	2.78377	409	NA
0.625	235	2.24926	310	NA
0.625	236	1.96026	202	G-Alpha Interface
0.625	237	2.14429	260	NA
0.625	238	1.86275	177	NA
0.625	239	1.94197	192	G-Alpha Interface
0.625	240	2.07208	235	NA
0.625	241	1.99823	214	NA
0.625	242	2.26629	319	NA
0.625	243	2.3551	342	NA
0.625	244	2.44316	371	NA
0.625	245	2.38766	352	NA
0.625	246	2.38887	353	NA
0.625	247	2.15497	264	NA
0.625	248	2.4098	361	NA
0.625	249	2.46299	377	NA
0.625	250	2.69886	406	NA
0.625	251	2.48043	380	NA
0.625	252	2.31948	334	NA
0.625	253	2.22839	299	NA
0.625	254	2.93426	411	NA
0.625	255	2.34546	341	NA
0.625	256	2.07766	238	NA
0.625	257	2.43731	368	NA
0.625	258	2.33142	337	NA
0.625	259	2.31073	331	NA
0.625	260	2.3771	348	NA
0.625	261	2.50819	386	NA
0.625	262	2.64159	402	NA
0.625	263	2.1941	279	NA
0.625	264	1.96571	204	NA
0.625	265	2.26296	317	NA
0.625	266	2.21735	295	NA
0.625	267	2.10444	243	NA
0.625	268	2.15383	263	DRY Motif
0.625	269	2.21019	287	NA
0.625	270	1.65053	113	NA
0.625	271	1.54392	78	G-Alpha Interface
0.625	272	2.0709	234	NA
0.625	273	1.90533	186	NA
0.625	274	1.96512	203	G-Alpha Interface
0.625	275	1.64111	107	G-Alpha Interface
0.625	276	2.01397	215	NA
0.625	277	1.82231	163	NA
0.625	278	1.62461	102	H2O Network
0.625	279	1.55239	80	NA
0.625	280	1.5747	89	NA
0.625	281	1.73611	138	NA
0.625	282	1.43534	57	PIF
0.625	283	1.85808	174	NA
0.625	284	1.5969	95	NA
0.625	285	1.47048	64	CWxP
0.625	286	1.1251	4	CWxP
0.625	287	1.76191	148	NA
0.625	288	1.25675	22	NA
0.625	289	1.16258	6	Orthosteric Site
0.625	290	1.43264	56	Orthosteric Site
0.625	291	1.65929	118	NA
0.625	292	1.67392	120	NA
0.625	293	1.76212	149	Orthosteric Site
0.625	294	1.60841	98	NA
0.625	295	1.87566	178	NA
0.625	296	2.21757	296	NA
0.625	297	2.07414	237	NA
0.625	298	2.19886	280	NA
0.625	299	2.13797	259	NA
0.625	300	2.04383	224	NA
0.625	301	2.18535	278	NA
0.625	302	2.12522	256	NA
0.625	303	1.65057	114	NA
0.625	304	2.2049	282	NA
0.625	305	1.68831	125	NA
0.625	306	1.58849	93	NA
0.625	307	2.25499	313	NA
0.625	308	1.62902	103	NA
0.625	309	2.10751	244	Orthosteric Site
0.625	310	1.95881	201	NA
0.625	311	1.58651	92	H2O Network
0.625	312	1.25111	19	Orthosteric Site
0.625	313	1.52486	76	NA
0.625	314	1.63248	104	NA
0.625	315	1.08913	2	NA
0.625	316	1.23393	18	NA
0.625	317	1.71348	133	NA
0.625	318	1.35481	45	H2O Network
0.625	319	1.17242	8	NA
0.625	320	1.68104	121	NA
0.625	321	1.34984	43	NA
0.625	322	1.35381	44	NPxxY
0.625	323	1.34873	42	NPxxY
0.625	324	1.59925	96	NA
0.625	325	1.33562	39	NA
0.625	326	1.10614	3	NPxxY
0.625	327	1.7344	136	NA
0.625	328	1.75203	144	NA
0.625	329	1.6162	100	NA
0.625	330	2.39704	359	NA
0.625	331	1.85206	171	NA
0.625	332	1.27411	25	NA
0.625	333	2.45147	374	NA
0.625	334	2.24721	309	NA
0.625	335	1.68444	123	NA
0.625	336	1.71589	135	NA
0.625	337	1.93533	189	NA
0.625	338	1.78662	155	NA
0.625	339	1.70087	128	NA
0.625	340	1.88436	179	NA
0.625	341	2.20798	285	NA
0.625	342	2.39408	355	NA
0.625	343	2.32762	336	NA
0.625	344	2.06241	231	NA
0.625	345	2.62441	400	NA
0.625	346	2.24352	307	NA
0.625	347	2.29305	325	NA
0.625	348	2.2905	324	NA
0.625	349	2.39052	354	NA
0.625	350	2.43176	366	NA
0.625	351	2.50005	385	NA
0.625	352	2.22	298	NA
0.625	353	2.39601	358	NA
0.625	354	2.21022	288	NA
0.625	355	2.44924	373	NA
0.625	356	2.28354	323	NA
0.625	357	2.06669	232	NA
0.625	358	2.16756	269	NA
0.625	359	2.1241	255	NA
0.625	360	2.3255	335	NA
0.625	361	2.3382	339	NA
0.625	362	2.23769	305	NA
0.625	363	2.28279	322	NA
0.625	364	2.48149	382	NA
0.625	365	2.07882	239	NA
0.625	366	2.23069	300	NA
0.625	367	2.15759	265	NA
0.625	368	2.05721	228	NA
0.625	369	2.23498	304	NA
0.625	370	2.40991	362	NA
0.625	371	2.30032	328	NA
0.625	372	2.26431	318	NA
0.625	373	2.29367	326	NA
0.625	374	2.33544	338	NA
0.625	375	2.30418	330	NA
0.625	376	2.4119	363	NA
0.625	377	2.37246	345	NA
0.625	378	2.49019	384	NA
0.625	379	2.51016	387	NA
0.625	380	2.62265	398	NA
0.625	381	2.46871	378	NA
0.625	382	2.3685	344	NA
0.625	383	2.48944	383	NA
0.625	384	1.84147	170	NA
0.625	385	2.25894	315	NA
0.625	386	2.17961	275	NA
0.625	387	2.06231	230	NA
0.625	388	2.25708	314	NA
0.625	389	2.45646	376	NA
0.625	390	2.12812	257	NA
0.625	391	2.23412	301	NA
0.625	392	2.13019	258	NA
0.625	393	2.39465	356	NA
0.625	394	2.40244	360	NA
0.625	395	2.15195	262	NA
0.625	396	2.56107	394	NA
0.625	397	2.39548	357	NA
0.625	398	2.11258	248	NA
0.625	399	1.98121	207	NA
0.625	400	2.38418	350	NA
0.625	401	2.17137	272	NA
0.625	402	2.53786	392	NA
0.625	403	2.21597	293	NA
0.625	404	2.17294	273	NA
0.625	405	2.37632	347	NA
0.625	406	2.30296	329	NA
0.625	407	2.56689	396	NA
0.625	408	2.38723	351	NA
0.625	409	2.44272	370	NA
0.625	410	2.53001	389	NA
0.625	411	2.71126	407	NA
0.625	412	2.27918	321	NA
0.625	413	3.13734	412	NA
5	2	1.68272	366	NA
5	3	1.6635	353	NA
5	4	1.70934	385	NA
5	5	1.62812	327	NA
5	6	1.79974	406	NA
5	7	1.7502	400	NA
5	8	1.57401	284	NA
5	9	1.61878	319	NA
5	10	1.38991	146	NA
5	11	1.417	157	NA
5	12	1.39105	148	NA
5	13	1.51027	223	NA
5	14	1.80539	408	NA
5	15	1.71937	391	NA
5	16	1.534	245	NA
5	17	1.63148	329	NA
5	18	1.5632	272	NA
5	19	1.59665	302	NA
5	20	1.67039	358	NA
5	21	1.71502	389	NA
5	22	1.60961	311	NA
5	23	1.54691	261	NA
5	24	1.68905	372	NA
5	25	1.71267	388	NA
5	26	1.69149	375	NA
5	27	1.91706	410	NA
5	28	1.68268	365	NA
5	29	1.79402	405	NA
5	30	1.50593	221	NA
5	31	1.69064	374	NA
5	32	1.39098	147	NA
5	33	1.42726	161	NA
5	34	1.56747	275	NA
5	35	1.59972	305	NA
5	36	1.36797	136	NA
5	37	1.52507	240	NA
5	38	1.26396	96	NA
5	39	1.29239	107	NA
5	40	1.27766	103	NA
5	41	1.46853	183	NA
5	42	1.25754	91	NA
5	43	1.33342	123	NA
5	44	1.43517	167	NA
5	45	1.31839	117	NA
5	46	1.6501	342	NA
5	47	1.59296	298	NA
5	48	1.2376	78	NA
5	49	1.40828	154	NA
5	50	1.35204	132	NA
5	51	0.915495	3	H2O Network
5	52	1.24022	82	NA
5	53	1.35052	131	NA
5	54	1.26625	97	NA
5	55	1.04969	19	NA
5	56	1.45493	177	NA
5	57	1.18239	56	NA
5	58	1.14443	41	NA
5	59	1.58829	294	NA
5	60	1.10047	30	NA
5	61	1.66691	356	NA
5	62	1.51593	231	NA
5	63	1.27411	102	NA
5	64	1.22354	71	NA
5	65	1.18411	57	NA
5	66	1.25757	92	NA
5	67	1.48049	195	NA
5	68	1.37151	138	H2O Network
5	69	1.15891	45	NA
5	70	1.49344	203	Cholesterol
5	71	1.11026	33	NA
5	72	1.3122	115	NA
5	73	1.50555	218	NA
5	74	1.01414	15	NA
5	75	1.0631	22	NA
5	76	1.08749	28	NA
5	77	1.26301	95	NA
5	78	1.16734	48	NA
5	79	1.38052	142	H2O Network
5	80	1.05221	20	NA
5	81	1.06629	24	NA
5	82	1.40417	150	NA
5	83	0.975193	11	NA
5	84	1.2213	69	NA
5	85	1.40719	153	NA
5	86	1.0525	21	NA
5	87	1.23824	80	NA
5	88	0.929423	5	NA
5	89	1.3195	119	NA
5	90	1.46294	180	NA
5	91	1.34193	127	NA
5	92	1.46665	181	NA
5	93	1.57309	281	NA
5	94	1.71652	390	NA
5	95	1.46782	182	NA
5	96	1.5016	213	NA
5	97	1.49479	205	NA
5	98	1.70753	384	NA
5	99	1.04484	17	NA
5	100	1.62452	324	NA
5	101	1.18177	54	NA
5	102	1.06469	23	NA
5	103	1.48673	199	NA
5	104	1.61224	316	NA
5	105	1.20077	64	NA
5	106	0.910157	2	Disulfide Bonds
5	107	1.29329	108	NA
5	108	1.34441	128	NA
5	109	1.65956	348	Orthosteric Site
5	110	1.71175	387	NA
5	111	1.35788	134	NA
5	112	1.12338	36	NA
5	113	0.92001	4	Orthosteric Site
5	114	1.16816	50	Orthosteric Site
5	115	1.29402	109	NA
5	116	1.245	88	NA
5	117	1.11517	34	NA
5	118	1.12278	35	NA
5	119	1.19846	63	NA
5	120	1.16762	49	NA
5	121	1.17659	52	PIF
5	122	1.80525	407	NA
5	123	1.18684	60	NA
5	124	1.20329	65	H2O Network
5	125	1.24157	84	NA
5	126	1.23815	79	NA
5	127	1.30442	114	NA
5	128	1.07024	25	NA
5	129	1.27062	100	NA
5	130	1.27994	104	DRY Motif
5	131	1.09222	29	DRY Motif
5	132	1.28249	106	DRY Motif
5	133	1.3821	143	NA
5	134	1.51642	232	G-Alpha Interface
5	135	1.04821	18	G-Alpha Interface
5	136	1.56429	273	G-Alpha Interface
5	137	1.49396	204	NA
5	138	1.55593	266	G-Alpha Interface
5	139	1.39787	149	G-Alpha Interface
5	140	1.65958	349	G-Alpha Interface
5	141	1.68214	364	G-Alpha Interface
5	142	1.5204	235	G-Alpha Interface
5	143	1.52167	236	G-Alpha Interface
5	144	1.59946	304	NA
5	145	1.49774	207	NA
5	146	1.24423	87	NA
5	147	1.47272	187	NA
5	148	1.58677	292	NA
5	149	1.53056	243	NA
5	150	1.21481	68	NA
5	151	1.50177	215	Cholesterol
5	152	1.4811	196	NA
5	153	1.23434	76	NA
5	154	1.14842	42	Cholesterol
5	155	1.32258	121	NA
5	156	1.35484	133	NA
5	157	1.2302	72	NA
5	158	0.950393	7	Cholesterol
5	159	1.20909	67	NA
5	160	1.42812	163	NA
5	161	0.943508	6	NA
5	162	1.2361	77	NA
5	163	1.25765	93	NA
5	164	1.47163	185	NA
5	165	1.00331	14	NA
5	166	1.4557	178	NA
5	167	1.43595	168	NA
5	168	1.07421	26	NA
5	169	1.29584	111	NA
5	170	1.59621	300	NA
5	171	1.44202	171	NA
5	172	1.40477	151	NA
5	173	1.24134	83	NA
5	174	1.33897	126	NA
5	175	1.37474	139	NA
5	176	1.40579	152	NA
5	177	1.51389	228	NA
5	178	1.41763	158	NA
5	179	1.57688	286	NA
5	180	1.47295	188	NA
5	181	1.18214	55	NA
5	182	1.4796	193	NA
5	183	1.48501	198	NA
5	184	1.15839	44	Disulfide Bonds
5	185	1.18553	58	NA
5	186	1.69183	376	NA
5	187	1.49044	200	NA
5	188	1.47971	194	NA
5	189	1.54011	251	NA
5	190	1.03194	16	Disulfide Bonds
5	191	0.952661	8	Disulfide Bonds
5	192	1.94236	411	Orthosteric Site
5	193	1.73861	397	Orthosteric Site
5	194	1.78557	403	NA
5	195	1.61066	314	NA
5	196	1.34979	130	NA
5	197	1.51148	224	NA
5	198	1.63253	330	NA
5	199	1.23264	74	NA
5	200	1.79381	404	NA
5	201	1.70964	386	NA
5	202	1.59592	299	NA
5	203	1.08108	27	Orthosteric Site
5	204	1.19681	62	NA
5	205	1.4266	160	NA
5	206	1.50161	214	NA
5	207	1.16648	46	Orthosteric Site
5	208	1.2235	70	NA
5	209	1.53426	246	NA
5	210	1.57907	288	NA
5	211	0.983664	13	PIF
5	212	1.42367	159	NA
5	213	1.40889	155	NA
5	214	1.42768	162	NA
5	215	1.32025	120	NA
5	216	1.32594	122	NA
5	217	1.6217	321	NA
5	218	1.4488	175	NA
5	219	1.50196	216	DRY Motif
5	220	1.57888	287	NA
5	221	1.6393	334	NA
5	222	1.31672	116	G-Alpha Interface
5	223	1.64625	341	NA
5	224	1.70505	381	NA
5	225	1.65275	344	G-Alpha Interface
5	226	1.12358	37	G-Alpha Interface
5	227	1.3345	124	NA
5	228	1.54442	259	NA
5	229	1.3188	118	G-Alpha Interface
5	230	1.44095	169	G-Alpha Interface
5	231	1.47957	192	NA
5	232	1.60968	312	G-Alpha Interface
5	233	1.54878	262	G-Alpha Interface
5	234	1.50153	211	NA
5	235	1.60449	309	NA
5	236	1.62305	323	G-Alpha Interface
5	237	1.59128	297	NA
5	238	1.50588	220	NA
5	239	1.65914	347	G-Alpha Interface
5	240	1.59655	301	NA
5	241	1.6659	354	NA
5	242	1.65113	343	NA
5	243	1.54193	255	NA
5	244	1.64335	337	NA
5	245	1.60426	308	NA
5	246	1.62793	326	NA
5	247	1.5619	270	NA
5	248	1.68527	370	NA
5	249	1.51856	234	NA
5	250	1.5498	263	NA
5	251	1.65341	345	NA
5	252	1.5666	274	NA
5	253	1.7685	402	NA
5	254	1.53497	247	NA
5	255	1.64545	340	NA
5	256	1.64537	339	NA
5	257	1.65412	346	NA
5	258	1.57235	280	NA
5	259	1.71987	393	NA
5	260	1.71981	392	NA
5	261	1.6899	373	NA
5	262	1.68485	369	NA
5	263	1.69254	377	NA
5	264	1.53305	244	NA
5	265	1.61239	317	NA
5	266	1.53005	242	NA
5	267	1.54019	252	NA
5	268	1.47595	190	DRY Motif
5	269	1.51382	227	NA
5	270	1.4925	201	NA
5	271	1.54208	256	G-Alpha Interface
5	272	1.43256	165	NA
5	273	1.55949	269	NA
5	274	1.43053	164	G-Alpha Interface
5	275	1.1666	47	G-Alpha Interface
5	276	1.27255	101	NA
5	277	1.33877	125	NA
5	278	1.2316	73	H2O Network
5	279	1.3635	135	NA
5	280	1.47747	191	NA
5	281	1.51195	225	NA
5	282	1.10774	32	PIF
5	283	1.26163	94	NA
5	284	1.26922	99	NA
5	285	1.15795	43	CWxP
5	286	0.968578	9	CWxP
5	287	1.18092	53	NA
5	288	0.909751	1	NA
5	289	1.10352	31	Orthosteric Site
5	290	1.38663	145	Orthosteric Site
5	291	1.243	86	NA
5	292	1.49287	202	NA
5	293	1.62013	320	Orthosteric Site
5	294	1.50576	219	NA
5	295	1.52369	237	NA
5	296	1.74349	398	NA
5	297	1.64159	336	NA
5	298	1.4968	206	NA
5	299	1.44131	170	NA
5	300	1.50311	217	NA
5	301	1.4455	174	NA
5	302	1.58867	296	NA
5	303	1.49916	208	NA
5	304	1.50836	222	NA
5	305	1.34614	129	NA
5	306	1.20822	66	NA
5	307	1.44468	172	NA
5	308	1.75673	401	NA
5	309	1.61193	315	Orthosteric Site
5	310	1.43485	166	NA
5	311	1.13887	40	H2O Network
5	312	0.970491	10	Orthosteric Site
5	313	1.1698	51	NA
5	314	1.28128	105	NA
5	315	0.980019	12	NA
5	316	1.19207	61	NA
5	317	1.18662	59	NA
5	318	1.376	140	H2O Network
5	319	1.12995	38	NA
5	320	1.37983	141	NA
5	321	1.25253	89	NA
5	322	1.2686	98	NPxxY
5	323	1.13772	39	NPxxY
5	324	1.4817	197	NA
5	325	1.29474	110	NA
5	326	1.25696	90	NPxxY
5	327	1.51517	230	NA
5	328	1.63343	331	NA
5	329	1.41507	156	NA
5	330	1.46969	184	NA
5	331	1.30135	113	NA
5	332	1.24015	81	NA
5	333	1.44469	173	NA
5	334	1.62918	328	NA
5	335	1.24264	85	NA
5	336	1.29962	112	NA
5	337	1.45745	179	NA
5	338	1.36925	137	NA
5	339	1.38562	144	NA
5	340	1.23432	75	NA
5	341	1.67162	360	NA
5	342	1.47454	189	NA
5	343	1.54618	260	NA
5	344	1.5416	253	NA
5	345	1.50015	209	NA
5	346	1.6845	368	NA
5	347	1.70266	380	NA
5	348	1.60562	310	NA
5	349	1.55186	265	NA
5	350	1.85423	409	NA
5	351	1.73273	395	NA
5	352	1.57122	279	NA
5	353	1.51806	233	NA
5	354	1.64029	335	NA
5	355	1.54384	257	NA
5	356	1.47261	186	NA
5	357	1.53945	250	NA
5	358	1.56824	277	NA
5	359	1.55066	264	NA
5	360	1.645	338	NA
5	361	1.73512	396	NA
5	362	1.5885	295	NA
5	363	1.56771	276	NA
5	364	1.67777	361	NA
5	365	1.56997	278	NA
5	366	1.58427	289	NA
5	367	1.67115	359	NA
5	368	1.60119	306	NA
5	369	1.55826	268	NA
5	370	1.70658	383	NA
5	371	1.52426	238	NA
5	372	1.50157	212	NA
5	373	1.50147	210	NA
5	374	1.6027	307	NA
5	375	1.62286	322	NA
5	376	1.63576	333	NA
5	377	1.57609	285	NA
5	378	1.53538	248	NA
5	379	1.61515	318	NA
5	380	1.70513	382	NA
5	381	1.68352	367	NA
5	382	1.62727	325	NA
5	383	1.67959	363	NA
5	384	1.58601	291	NA
5	385	1.72608	394	NA
5	386	1.45192	176	NA
5	387	1.57317	282	NA
5	388	1.53732	249	NA
5	389	1.57377	283	NA
5	390	1.52491	239	NA
5	391	1.59899	303	NA
5	392	1.67874	362	NA
5	393	1.54428	258	NA
5	394	1.66642	355	NA
5	395	1.5573	267	NA
5	396	1.66872	357	NA
5	397	1.63569	332	NA
5	398	1.70188	379	NA
5	399	1.66212	352	NA
5	400	1.58537	290	NA
5	401	1.66138	351	NA
5	402	1.512	226	NA
5	403	1.51461	229	NA
5	404	1.52519	241	NA
5	405	1.54183	254	NA
5	406	1.61026	313	NA
5	407	1.66055	350	NA
5	408	1.58695	293	NA
5	409	1.74547	399	NA
5	410	1.56257	271	NA
5	411	1.69627	378	NA
5	412	1.96965	412	NA
5	413	1.68548	371	NA
